# Supplementary material for: Thermoneutrality-Induced Macrophage Accumulation in Brown Adipose Tissue Does Not Impair the Tissue’s Competence for Cold-Induced Thermogenic Recruitment
Source: Front Endocrinol (Lausanne). 2020 Oct 30;11:568682. doi: 10.3389/fendo.2020.568682 (PMC7662517; doi:10.3389/fendo.2020.568682)
Supplement: Supplementary file 2 [file Table_1.xlsx]

## Sheet: 2401 genes
2401 commonly upregulated genes
ENSMUSG00000000078
ENSMUSG00000000204
ENSMUSG00000000244
ENSMUSG00000000248
ENSMUSG00000000290
ENSMUSG00000000303
ENSMUSG00000000318
ENSMUSG00000000386
ENSMUSG00000000486
ENSMUSG00000000555
ENSMUSG00000000567
ENSMUSG00000000627
ENSMUSG00000000673
ENSMUSG00000000682
ENSMUSG00000000693
ENSMUSG00000000730
ENSMUSG00000000732
ENSMUSG00000000817
ENSMUSG00000000861
ENSMUSG00000000957
ENSMUSG00000000958
ENSMUSG00000000982
ENSMUSG00000001020
ENSMUSG00000001021
ENSMUSG00000001025
ENSMUSG00000001027
ENSMUSG00000001034
ENSMUSG00000001039
ENSMUSG00000001119
ENSMUSG00000001128
ENSMUSG00000001131
ENSMUSG00000001228
ENSMUSG00000001270
ENSMUSG00000001281
ENSMUSG00000001333
ENSMUSG00000001403
ENSMUSG00000001435
ENSMUSG00000001473
ENSMUSG00000001493
ENSMUSG00000001517
ENSMUSG00000001525
ENSMUSG00000001555
ENSMUSG00000001588
ENSMUSG00000001604
ENSMUSG00000001750
ENSMUSG00000001865
ENSMUSG00000001986
ENSMUSG00000002006
ENSMUSG00000002055
ENSMUSG00000002100
ENSMUSG00000002111
ENSMUSG00000002204
ENSMUSG00000002233
ENSMUSG00000002257
ENSMUSG00000002297
ENSMUSG00000002307
ENSMUSG00000002458
ENSMUSG00000002477
ENSMUSG00000002500
ENSMUSG00000002602
ENSMUSG00000002603
ENSMUSG00000002668
ENSMUSG00000002699
ENSMUSG00000002808
ENSMUSG00000002835
ENSMUSG00000002870
ENSMUSG00000002897
ENSMUSG00000003038
ENSMUSG00000003062
ENSMUSG00000003206
ENSMUSG00000003283
ENSMUSG00000003348
ENSMUSG00000003355
ENSMUSG00000003363
ENSMUSG00000003484
ENSMUSG00000003644
ENSMUSG00000003665
ENSMUSG00000003746
ENSMUSG00000003779
ENSMUSG00000003812
ENSMUSG00000003814
ENSMUSG00000003873
ENSMUSG00000003882
ENSMUSG00000004098
ENSMUSG00000004099
ENSMUSG00000004110
ENSMUSG00000004266
ENSMUSG00000004317
ENSMUSG00000004359
ENSMUSG00000004446
ENSMUSG00000004530
ENSMUSG00000004665
ENSMUSG00000004677
ENSMUSG00000004698
ENSMUSG00000004707
ENSMUSG00000004709
ENSMUSG00000004730
ENSMUSG00000004791
ENSMUSG00000004933
ENSMUSG00000004952
ENSMUSG00000005054
ENSMUSG00000005087
ENSMUSG00000005103
ENSMUSG00000005124
ENSMUSG00000005142
ENSMUSG00000005233
ENSMUSG00000005267
ENSMUSG00000005339
ENSMUSG00000005410
ENSMUSG00000005413
ENSMUSG00000005447
ENSMUSG00000005465
ENSMUSG00000005470
ENSMUSG00000005481
ENSMUSG00000005628
ENSMUSG00000005667
ENSMUSG00000005696
ENSMUSG00000005732
ENSMUSG00000005800
ENSMUSG00000005824
ENSMUSG00000005958
ENSMUSG00000005968
ENSMUSG00000005973
ENSMUSG00000006014
ENSMUSG00000006057
ENSMUSG00000006219
ENSMUSG00000006221
ENSMUSG00000006304
ENSMUSG00000006360
ENSMUSG00000006390
ENSMUSG00000006398
ENSMUSG00000006403
ENSMUSG00000006411
ENSMUSG00000006517
ENSMUSG00000006519
ENSMUSG00000006542
ENSMUSG00000006585
ENSMUSG00000006589
ENSMUSG00000006678
ENSMUSG00000006731
ENSMUSG00000006732
ENSMUSG00000006764
ENSMUSG00000006782
ENSMUSG00000007033
ENSMUSG00000007035
ENSMUSG00000007041
ENSMUSG00000007080
ENSMUSG00000007107
ENSMUSG00000007653
ENSMUSG00000008136
ENSMUSG00000008318
ENSMUSG00000008475
ENSMUSG00000008496
ENSMUSG00000009185
ENSMUSG00000009281
ENSMUSG00000009292
ENSMUSG00000009378
ENSMUSG00000009566
ENSMUSG00000009585
ENSMUSG00000009628
ENSMUSG00000009654
ENSMUSG00000009687
ENSMUSG00000009731
ENSMUSG00000009772
ENSMUSG00000010064
ENSMUSG00000010067
ENSMUSG00000010142
ENSMUSG00000010307
ENSMUSG00000010342
ENSMUSG00000010461
ENSMUSG00000010663
ENSMUSG00000010803
ENSMUSG00000010830
ENSMUSG00000011008
ENSMUSG00000011179
ENSMUSG00000011256
ENSMUSG00000011884
ENSMUSG00000012443
ENSMUSG00000012519
ENSMUSG00000013089
ENSMUSG00000013584
ENSMUSG00000013698
ENSMUSG00000013707
ENSMUSG00000013936
ENSMUSG00000014158
ENSMUSG00000014164
ENSMUSG00000014543
ENSMUSG00000014599
ENSMUSG00000014686
ENSMUSG00000015027
ENSMUSG00000015112
ENSMUSG00000015143
ENSMUSG00000015312
ENSMUSG00000015340
ENSMUSG00000015355
ENSMUSG00000015396
ENSMUSG00000015653
ENSMUSG00000015745
ENSMUSG00000015766
ENSMUSG00000015829
ENSMUSG00000015854
ENSMUSG00000015880
ENSMUSG00000015947
ENSMUSG00000015950
ENSMUSG00000015968
ENSMUSG00000016024
ENSMUSG00000016206
ENSMUSG00000016239
ENSMUSG00000016262
ENSMUSG00000016529
ENSMUSG00000017057
ENSMUSG00000017144
ENSMUSG00000017146
ENSMUSG00000017417
ENSMUSG00000017499
ENSMUSG00000017550
ENSMUSG00000017631
ENSMUSG00000017639
ENSMUSG00000017652
ENSMUSG00000017677
ENSMUSG00000017697
ENSMUSG00000017716
ENSMUSG00000017760
ENSMUSG00000017765
ENSMUSG00000017781
ENSMUSG00000017830
ENSMUSG00000017897
ENSMUSG00000017929
ENSMUSG00000018008
ENSMUSG00000018168
ENSMUSG00000018239
ENSMUSG00000018293
ENSMUSG00000018398
ENSMUSG00000018459
ENSMUSG00000018500
ENSMUSG00000018507
ENSMUSG00000018654
ENSMUSG00000018752
ENSMUSG00000018774
ENSMUSG00000018819
ENSMUSG00000018822
ENSMUSG00000018849
ENSMUSG00000018893
ENSMUSG00000018920
ENSMUSG00000018924
ENSMUSG00000018927
ENSMUSG00000018930
ENSMUSG00000018965
ENSMUSG00000019088
ENSMUSG00000019122
ENSMUSG00000019214
ENSMUSG00000019302
ENSMUSG00000019539
ENSMUSG00000019773
ENSMUSG00000019787
ENSMUSG00000019796
ENSMUSG00000019810
ENSMUSG00000019823
ENSMUSG00000019832
ENSMUSG00000019843
ENSMUSG00000019845
ENSMUSG00000019850
ENSMUSG00000019852
ENSMUSG00000019866
ENSMUSG00000019874
ENSMUSG00000019876
ENSMUSG00000019913
ENSMUSG00000019942
ENSMUSG00000019943
ENSMUSG00000019961
ENSMUSG00000019979
ENSMUSG00000019987
ENSMUSG00000019997
ENSMUSG00000020017
ENSMUSG00000020053
ENSMUSG00000020067
ENSMUSG00000020100
ENSMUSG00000020101
ENSMUSG00000020120
ENSMUSG00000020143
ENSMUSG00000020150
ENSMUSG00000020152
ENSMUSG00000020189
ENSMUSG00000020216
ENSMUSG00000020241
ENSMUSG00000020256
ENSMUSG00000020272
ENSMUSG00000020275
ENSMUSG00000020312
ENSMUSG00000020330
ENSMUSG00000020333
ENSMUSG00000020334
ENSMUSG00000020340
ENSMUSG00000020377
ENSMUSG00000020388
ENSMUSG00000020395
ENSMUSG00000020399
ENSMUSG00000020407
ENSMUSG00000020422
ENSMUSG00000020437
ENSMUSG00000020467
ENSMUSG00000020475
ENSMUSG00000020493
ENSMUSG00000020573
ENSMUSG00000020592
ENSMUSG00000020635
ENSMUSG00000020649
ENSMUSG00000020672
ENSMUSG00000020689
ENSMUSG00000020709
ENSMUSG00000020722
ENSMUSG00000020733
ENSMUSG00000020736
ENSMUSG00000020737
ENSMUSG00000020773
ENSMUSG00000020778
ENSMUSG00000020808
ENSMUSG00000020814
ENSMUSG00000020865
ENSMUSG00000020897
ENSMUSG00000020901
ENSMUSG00000020914
ENSMUSG00000020974
ENSMUSG00000021054
ENSMUSG00000021068
ENSMUSG00000021087
ENSMUSG00000021091
ENSMUSG00000021123
ENSMUSG00000021175
ENSMUSG00000021176
ENSMUSG00000021190
ENSMUSG00000021198
ENSMUSG00000021211
ENSMUSG00000021213
ENSMUSG00000021250
ENSMUSG00000021253
ENSMUSG00000021260
ENSMUSG00000021262
ENSMUSG00000021280
ENSMUSG00000021281
ENSMUSG00000021306
ENSMUSG00000021313
ENSMUSG00000021322
ENSMUSG00000021360
ENSMUSG00000021365
ENSMUSG00000021384
ENSMUSG00000021391
ENSMUSG00000021403
ENSMUSG00000021423
ENSMUSG00000021451
ENSMUSG00000021457
ENSMUSG00000021477
ENSMUSG00000021483
ENSMUSG00000021485
ENSMUSG00000021493
ENSMUSG00000021569
ENSMUSG00000021591
ENSMUSG00000021596
ENSMUSG00000021614
ENSMUSG00000021624
ENSMUSG00000021640
ENSMUSG00000021665
ENSMUSG00000021670
ENSMUSG00000021676
ENSMUSG00000021684
ENSMUSG00000021697
ENSMUSG00000021701
ENSMUSG00000021702
ENSMUSG00000021720
ENSMUSG00000021725
ENSMUSG00000021728
ENSMUSG00000021768
ENSMUSG00000021798
ENSMUSG00000021822
ENSMUSG00000021838
ENSMUSG00000021879
ENSMUSG00000021880
ENSMUSG00000021886
ENSMUSG00000021898
ENSMUSG00000021928
ENSMUSG00000021948
ENSMUSG00000021965
ENSMUSG00000021998
ENSMUSG00000022010
ENSMUSG00000022014
ENSMUSG00000022015
ENSMUSG00000022021
ENSMUSG00000022033
ENSMUSG00000022034
ENSMUSG00000022037
ENSMUSG00000022070
ENSMUSG00000022090
ENSMUSG00000022102
ENSMUSG00000022123
ENSMUSG00000022126
ENSMUSG00000022146
ENSMUSG00000022148
ENSMUSG00000022150
ENSMUSG00000022180
ENSMUSG00000022206
ENSMUSG00000022221
ENSMUSG00000022237
ENSMUSG00000022240
ENSMUSG00000022246
ENSMUSG00000022303
ENSMUSG00000022322
ENSMUSG00000022346
ENSMUSG00000022360
ENSMUSG00000022367
ENSMUSG00000022372
ENSMUSG00000022385
ENSMUSG00000022408
ENSMUSG00000022422
ENSMUSG00000022436
ENSMUSG00000022438
ENSMUSG00000022439
ENSMUSG00000022443
ENSMUSG00000022456
ENSMUSG00000022488
ENSMUSG00000022489
ENSMUSG00000022500
ENSMUSG00000022514
ENSMUSG00000022525
ENSMUSG00000022534
ENSMUSG00000022548
ENSMUSG00000022565
ENSMUSG00000022575
ENSMUSG00000022584
ENSMUSG00000022636
ENSMUSG00000022665
ENSMUSG00000022667
ENSMUSG00000022673
ENSMUSG00000022769
ENSMUSG00000022816
ENSMUSG00000022817
ENSMUSG00000022831
ENSMUSG00000022876
ENSMUSG00000022892
ENSMUSG00000022894
ENSMUSG00000022901
ENSMUSG00000022912
ENSMUSG00000022945
ENSMUSG00000022952
ENSMUSG00000022965
ENSMUSG00000022978
ENSMUSG00000023004
ENSMUSG00000023015
ENSMUSG00000023031
ENSMUSG00000023045
ENSMUSG00000023064
ENSMUSG00000023092
ENSMUSG00000023132
ENSMUSG00000023169
ENSMUSG00000023186
ENSMUSG00000023274
ENSMUSG00000023277
ENSMUSG00000023341
ENSMUSG00000023349
ENSMUSG00000023367
ENSMUSG00000023505
ENSMUSG00000023805
ENSMUSG00000023827
ENSMUSG00000023873
ENSMUSG00000023885
ENSMUSG00000023905
ENSMUSG00000023919
ENSMUSG00000023930
ENSMUSG00000023940
ENSMUSG00000023945
ENSMUSG00000023947
ENSMUSG00000023982
ENSMUSG00000023992
ENSMUSG00000024013
ENSMUSG00000024030
ENSMUSG00000024048
ENSMUSG00000024052
ENSMUSG00000024053
ENSMUSG00000024056
ENSMUSG00000024059
ENSMUSG00000024084
ENSMUSG00000024085
ENSMUSG00000024087
ENSMUSG00000024165
ENSMUSG00000024177
ENSMUSG00000024222
ENSMUSG00000024235
ENSMUSG00000024253
ENSMUSG00000024270
ENSMUSG00000024277
ENSMUSG00000024300
ENSMUSG00000024331
ENSMUSG00000024338
ENSMUSG00000024371
ENSMUSG00000024381
ENSMUSG00000024397
ENSMUSG00000024399
ENSMUSG00000024401
ENSMUSG00000024411
ENSMUSG00000024424
ENSMUSG00000024486
ENSMUSG00000024501
ENSMUSG00000024511
ENSMUSG00000024521
ENSMUSG00000024529
ENSMUSG00000024590
ENSMUSG00000024613
ENSMUSG00000024617
ENSMUSG00000024621
ENSMUSG00000024640
ENSMUSG00000024644
ENSMUSG00000024659
ENSMUSG00000024660
ENSMUSG00000024663
ENSMUSG00000024664
ENSMUSG00000024670
ENSMUSG00000024672
ENSMUSG00000024675
ENSMUSG00000024677
ENSMUSG00000024679
ENSMUSG00000024691
ENSMUSG00000024696
ENSMUSG00000024737
ENSMUSG00000024742
ENSMUSG00000024770
ENSMUSG00000024776
ENSMUSG00000024781
ENSMUSG00000024791
ENSMUSG00000024795
ENSMUSG00000024818
ENSMUSG00000024827
ENSMUSG00000024854
ENSMUSG00000024885
ENSMUSG00000024897
ENSMUSG00000024900
ENSMUSG00000024912
ENSMUSG00000024965
ENSMUSG00000024986
ENSMUSG00000024989
ENSMUSG00000025001
ENSMUSG00000025007
ENSMUSG00000025017
ENSMUSG00000025044
ENSMUSG00000025058
ENSMUSG00000025130
ENSMUSG00000025132
ENSMUSG00000025150
ENSMUSG00000025154
ENSMUSG00000025161
ENSMUSG00000025171
ENSMUSG00000025172
ENSMUSG00000025185
ENSMUSG00000025192
ENSMUSG00000025212
ENSMUSG00000025232
ENSMUSG00000025268
ENSMUSG00000025272
ENSMUSG00000025289
ENSMUSG00000025314
ENSMUSG00000025324
ENSMUSG00000025330
ENSMUSG00000025351
ENSMUSG00000025395
ENSMUSG00000025402
ENSMUSG00000025429
ENSMUSG00000025453
ENSMUSG00000025473
ENSMUSG00000025492
ENSMUSG00000025498
ENSMUSG00000025534
ENSMUSG00000025574
ENSMUSG00000025582
ENSMUSG00000025630
ENSMUSG00000025647
ENSMUSG00000025648
ENSMUSG00000025701
ENSMUSG00000025742
ENSMUSG00000025743
ENSMUSG00000025746
ENSMUSG00000025747
ENSMUSG00000025754
ENSMUSG00000025758
ENSMUSG00000025779
ENSMUSG00000025792
ENSMUSG00000025804
ENSMUSG00000025823
ENSMUSG00000025854
ENSMUSG00000025856
ENSMUSG00000025877
ENSMUSG00000025887
ENSMUSG00000025888
ENSMUSG00000025900
ENSMUSG00000025912
ENSMUSG00000025932
ENSMUSG00000025955
ENSMUSG00000026012
ENSMUSG00000026023
ENSMUSG00000026029
ENSMUSG00000026039
ENSMUSG00000026042
ENSMUSG00000026065
ENSMUSG00000026068
ENSMUSG00000026069
ENSMUSG00000026072
ENSMUSG00000026100
ENSMUSG00000026103
ENSMUSG00000026134
ENSMUSG00000026141
ENSMUSG00000026177
ENSMUSG00000026196
ENSMUSG00000026204
ENSMUSG00000026223
ENSMUSG00000026228
ENSMUSG00000026249
ENSMUSG00000026271
ENSMUSG00000026274
ENSMUSG00000026285
ENSMUSG00000026288
ENSMUSG00000026305
ENSMUSG00000026315
ENSMUSG00000026317
ENSMUSG00000026321
ENSMUSG00000026335
ENSMUSG00000026341
ENSMUSG00000026355
ENSMUSG00000026357
ENSMUSG00000026358
ENSMUSG00000026389
ENSMUSG00000026395
ENSMUSG00000026407
ENSMUSG00000026421
ENSMUSG00000026429
ENSMUSG00000026430
ENSMUSG00000026458
ENSMUSG00000026475
ENSMUSG00000026479
ENSMUSG00000026480
ENSMUSG00000026532
ENSMUSG00000026536
ENSMUSG00000026547
ENSMUSG00000026548
ENSMUSG00000026564
ENSMUSG00000026574
ENSMUSG00000026579
ENSMUSG00000026580
ENSMUSG00000026581
ENSMUSG00000026586
ENSMUSG00000026600
ENSMUSG00000026605
ENSMUSG00000026622
ENSMUSG00000026627
ENSMUSG00000026628
ENSMUSG00000026637
ENSMUSG00000026646
ENSMUSG00000026656
ENSMUSG00000026657
ENSMUSG00000026669
ENSMUSG00000026676
ENSMUSG00000026683
ENSMUSG00000026688
ENSMUSG00000026697
ENSMUSG00000026708
ENSMUSG00000026712
ENSMUSG00000026728
ENSMUSG00000026737
ENSMUSG00000026749
ENSMUSG00000026778
ENSMUSG00000026779
ENSMUSG00000026786
ENSMUSG00000026796
ENSMUSG00000026822
ENSMUSG00000026829
ENSMUSG00000026832
ENSMUSG00000026833
ENSMUSG00000026866
ENSMUSG00000026872
ENSMUSG00000026875
ENSMUSG00000026893
ENSMUSG00000026928
ENSMUSG00000026946
ENSMUSG00000026956
ENSMUSG00000026971
ENSMUSG00000026972
ENSMUSG00000026979
ENSMUSG00000026980
ENSMUSG00000026981
ENSMUSG00000026994
ENSMUSG00000027009
ENSMUSG00000027010
ENSMUSG00000027018
ENSMUSG00000027022
ENSMUSG00000027035
ENSMUSG00000027073
ENSMUSG00000027082
ENSMUSG00000027087
ENSMUSG00000027115
ENSMUSG00000027160
ENSMUSG00000027173
ENSMUSG00000027199
ENSMUSG00000027208
ENSMUSG00000027230
ENSMUSG00000027253
ENSMUSG00000027254
ENSMUSG00000027293
ENSMUSG00000027306
ENSMUSG00000027316
ENSMUSG00000027322
ENSMUSG00000027323
ENSMUSG00000027326
ENSMUSG00000027331
ENSMUSG00000027338
ENSMUSG00000027339
ENSMUSG00000027342
ENSMUSG00000027347
ENSMUSG00000027351
ENSMUSG00000027379
ENSMUSG00000027381
ENSMUSG00000027398
ENSMUSG00000027422
ENSMUSG00000027423
ENSMUSG00000027435
ENSMUSG00000027454
ENSMUSG00000027459
ENSMUSG00000027460
ENSMUSG00000027469
ENSMUSG00000027490
ENSMUSG00000027496
ENSMUSG00000027499
ENSMUSG00000027506
ENSMUSG00000027514
ENSMUSG00000027536
ENSMUSG00000027544
ENSMUSG00000027560
ENSMUSG00000027639
ENSMUSG00000027641
ENSMUSG00000027654
ENSMUSG00000027656
ENSMUSG00000027698
ENSMUSG00000027699
ENSMUSG00000027712
ENSMUSG00000027715
ENSMUSG00000027737
ENSMUSG00000027752
ENSMUSG00000027762
ENSMUSG00000027775
ENSMUSG00000027797
ENSMUSG00000027832
ENSMUSG00000027843
ENSMUSG00000027848
ENSMUSG00000027861
ENSMUSG00000027863
ENSMUSG00000027864
ENSMUSG00000027883
ENSMUSG00000027938
ENSMUSG00000027940
ENSMUSG00000027962
ENSMUSG00000027994
ENSMUSG00000027995
ENSMUSG00000028019
ENSMUSG00000028028
ENSMUSG00000028036
ENSMUSG00000028044
ENSMUSG00000028059
ENSMUSG00000028063
ENSMUSG00000028068
ENSMUSG00000028111
ENSMUSG00000028116
ENSMUSG00000028121
ENSMUSG00000028159
ENSMUSG00000028175
ENSMUSG00000028212
ENSMUSG00000028238
ENSMUSG00000028270
ENSMUSG00000028312
ENSMUSG00000028327
ENSMUSG00000028333
ENSMUSG00000028334
ENSMUSG00000028337
ENSMUSG00000028339
ENSMUSG00000028362
ENSMUSG00000028364
ENSMUSG00000028373
ENSMUSG00000028378
ENSMUSG00000028381
ENSMUSG00000028385
ENSMUSG00000028396
ENSMUSG00000028438
ENSMUSG00000028459
ENSMUSG00000028463
ENSMUSG00000028464
ENSMUSG00000028465
ENSMUSG00000028480
ENSMUSG00000028497
ENSMUSG00000028541
ENSMUSG00000028555
ENSMUSG00000028581
ENSMUSG00000028583
ENSMUSG00000028587
ENSMUSG00000028597
ENSMUSG00000028599
ENSMUSG00000028613
ENSMUSG00000028633
ENSMUSG00000028641
ENSMUSG00000028645
ENSMUSG00000028656
ENSMUSG00000028678
ENSMUSG00000028687
ENSMUSG00000028702
ENSMUSG00000028713
ENSMUSG00000028718
ENSMUSG00000028832
ENSMUSG00000028834
ENSMUSG00000028840
ENSMUSG00000028843
ENSMUSG00000028848
ENSMUSG00000028849
ENSMUSG00000028859
ENSMUSG00000028864
ENSMUSG00000028873
ENSMUSG00000028874
ENSMUSG00000028885
ENSMUSG00000028926
ENSMUSG00000028927
ENSMUSG00000028931
ENSMUSG00000028937
ENSMUSG00000028995
ENSMUSG00000029059
ENSMUSG00000029070
ENSMUSG00000029082
ENSMUSG00000029092
ENSMUSG00000029096
ENSMUSG00000029108
ENSMUSG00000029126
ENSMUSG00000029158
ENSMUSG00000029161
ENSMUSG00000029163
ENSMUSG00000029174
ENSMUSG00000029189
ENSMUSG00000029204
ENSMUSG00000029206
ENSMUSG00000029217
ENSMUSG00000029233
ENSMUSG00000029234
ENSMUSG00000029254
ENSMUSG00000029299
ENSMUSG00000029304
ENSMUSG00000029322
ENSMUSG00000029335
ENSMUSG00000029338
ENSMUSG00000029363
ENSMUSG00000029366
ENSMUSG00000029371
ENSMUSG00000029372
ENSMUSG00000029373
ENSMUSG00000029380
ENSMUSG00000029413
ENSMUSG00000029414
ENSMUSG00000029468
ENSMUSG00000029484
ENSMUSG00000029516
ENSMUSG00000029552
ENSMUSG00000029553
ENSMUSG00000029560
ENSMUSG00000029561
ENSMUSG00000029570
ENSMUSG00000029580
ENSMUSG00000029581
ENSMUSG00000029605
ENSMUSG00000029616
ENSMUSG00000029622
ENSMUSG00000029659
ENSMUSG00000029661
ENSMUSG00000029664
ENSMUSG00000029683
ENSMUSG00000029685
ENSMUSG00000029761
ENSMUSG00000029762
ENSMUSG00000029771
ENSMUSG00000029790
ENSMUSG00000029798
ENSMUSG00000029810
ENSMUSG00000029816
ENSMUSG00000029821
ENSMUSG00000029822
ENSMUSG00000029910
ENSMUSG00000029915
ENSMUSG00000029919
ENSMUSG00000029923
ENSMUSG00000029925
ENSMUSG00000029994
ENSMUSG00000030047
ENSMUSG00000030064
ENSMUSG00000030074
ENSMUSG00000030091
ENSMUSG00000030107
ENSMUSG00000030108
ENSMUSG00000030114
ENSMUSG00000030117
ENSMUSG00000030142
ENSMUSG00000030144
ENSMUSG00000030147
ENSMUSG00000030148
ENSMUSG00000030149
ENSMUSG00000030156
ENSMUSG00000030165
ENSMUSG00000030167
ENSMUSG00000030187
ENSMUSG00000030208
ENSMUSG00000030220
ENSMUSG00000030223
ENSMUSG00000030254
ENSMUSG00000030263
ENSMUSG00000030268
ENSMUSG00000030322
ENSMUSG00000030342
ENSMUSG00000030346
ENSMUSG00000030361
ENSMUSG00000030365
ENSMUSG00000030399
ENSMUSG00000030403
ENSMUSG00000030447
ENSMUSG00000030470
ENSMUSG00000030471
ENSMUSG00000030493
ENSMUSG00000030523
ENSMUSG00000030536
ENSMUSG00000030560
ENSMUSG00000030562
ENSMUSG00000030577
ENSMUSG00000030579
ENSMUSG00000030589
ENSMUSG00000030605
ENSMUSG00000030641
ENSMUSG00000030657
ENSMUSG00000030659
ENSMUSG00000030672
ENSMUSG00000030677
ENSMUSG00000030707
ENSMUSG00000030722
ENSMUSG00000030726
ENSMUSG00000030745
ENSMUSG00000030748
ENSMUSG00000030759
ENSMUSG00000030760
ENSMUSG00000030774
ENSMUSG00000030785
ENSMUSG00000030786
ENSMUSG00000030789
ENSMUSG00000030790
ENSMUSG00000030793
ENSMUSG00000030798
ENSMUSG00000030830
ENSMUSG00000030839
ENSMUSG00000030844
ENSMUSG00000030867
ENSMUSG00000030878
ENSMUSG00000030921
ENSMUSG00000030996
ENSMUSG00000031004
ENSMUSG00000031015
ENSMUSG00000031070
ENSMUSG00000031093
ENSMUSG00000031097
ENSMUSG00000031101
ENSMUSG00000031103
ENSMUSG00000031112
ENSMUSG00000031129
ENSMUSG00000031133
ENSMUSG00000031137
ENSMUSG00000031146
ENSMUSG00000031165
ENSMUSG00000031167
ENSMUSG00000031207
ENSMUSG00000031209
ENSMUSG00000031253
ENSMUSG00000031262
ENSMUSG00000031264
ENSMUSG00000031266
ENSMUSG00000031283
ENSMUSG00000031289
ENSMUSG00000031304
ENSMUSG00000031328
ENSMUSG00000031355
ENSMUSG00000031367
ENSMUSG00000031375
ENSMUSG00000031380
ENSMUSG00000031387
ENSMUSG00000031438
ENSMUSG00000031443
ENSMUSG00000031444
ENSMUSG00000031451
ENSMUSG00000031453
ENSMUSG00000031461
ENSMUSG00000031465
ENSMUSG00000031486
ENSMUSG00000031504
ENSMUSG00000031506
ENSMUSG00000031519
ENSMUSG00000031527
ENSMUSG00000031539
ENSMUSG00000031543
ENSMUSG00000031557
ENSMUSG00000031562
ENSMUSG00000031591
ENSMUSG00000031604
ENSMUSG00000031608
ENSMUSG00000031609
ENSMUSG00000031613
ENSMUSG00000031629
ENSMUSG00000031636
ENSMUSG00000031659
ENSMUSG00000031662
ENSMUSG00000031709
ENSMUSG00000031722
ENSMUSG00000031760
ENSMUSG00000031799
ENSMUSG00000031821
ENSMUSG00000031824
ENSMUSG00000031827
ENSMUSG00000031833
ENSMUSG00000031838
ENSMUSG00000031875
ENSMUSG00000031880
ENSMUSG00000031885
ENSMUSG00000031906
ENSMUSG00000031907
ENSMUSG00000031934
ENSMUSG00000031971
ENSMUSG00000032011
ENSMUSG00000032020
ENSMUSG00000032024
ENSMUSG00000032046
ENSMUSG00000032060
ENSMUSG00000032076
ENSMUSG00000032085
ENSMUSG00000032089
ENSMUSG00000032113
ENSMUSG00000032122
ENSMUSG00000032193
ENSMUSG00000032202
ENSMUSG00000032218
ENSMUSG00000032220
ENSMUSG00000032231
ENSMUSG00000032254
ENSMUSG00000032322
ENSMUSG00000032332
ENSMUSG00000032344
ENSMUSG00000032359
ENSMUSG00000032366
ENSMUSG00000032369
ENSMUSG00000032372
ENSMUSG00000032373
ENSMUSG00000032374
ENSMUSG00000032400
ENSMUSG00000032417
ENSMUSG00000032436
ENSMUSG00000032446
ENSMUSG00000032487
ENSMUSG00000032495
ENSMUSG00000032548
ENSMUSG00000032562
ENSMUSG00000032584
ENSMUSG00000032586
ENSMUSG00000032643
ENSMUSG00000032661
ENSMUSG00000032690
ENSMUSG00000032691
ENSMUSG00000032698
ENSMUSG00000032725
ENSMUSG00000032750
ENSMUSG00000032776
ENSMUSG00000032815
ENSMUSG00000032816
ENSMUSG00000032845
ENSMUSG00000032846
ENSMUSG00000032870
ENSMUSG00000032890
ENSMUSG00000032915
ENSMUSG00000032925
ENSMUSG00000032939
ENSMUSG00000033031
ENSMUSG00000033033
ENSMUSG00000033044
ENSMUSG00000033066
ENSMUSG00000033161
ENSMUSG00000033192
ENSMUSG00000033213
ENSMUSG00000033220
ENSMUSG00000033355
ENSMUSG00000033386
ENSMUSG00000033450
ENSMUSG00000033467
ENSMUSG00000033538
ENSMUSG00000033576
ENSMUSG00000033581
ENSMUSG00000033589
ENSMUSG00000033595
ENSMUSG00000033685
ENSMUSG00000033721
ENSMUSG00000033740
ENSMUSG00000033777
ENSMUSG00000033825
ENSMUSG00000033826
ENSMUSG00000033847
ENSMUSG00000033880
ENSMUSG00000033882
ENSMUSG00000033949
ENSMUSG00000033952
ENSMUSG00000033970
ENSMUSG00000034023
ENSMUSG00000034041
ENSMUSG00000034116
ENSMUSG00000034127
ENSMUSG00000034156
ENSMUSG00000034205
ENSMUSG00000034206
ENSMUSG00000034220
ENSMUSG00000034226
ENSMUSG00000034266
ENSMUSG00000034271
ENSMUSG00000034311
ENSMUSG00000034317
ENSMUSG00000034329
ENSMUSG00000034330
ENSMUSG00000034349
ENSMUSG00000034353
ENSMUSG00000034361
ENSMUSG00000034390
ENSMUSG00000034422
ENSMUSG00000034438
ENSMUSG00000034457
ENSMUSG00000034459
ENSMUSG00000034591
ENSMUSG00000034595
ENSMUSG00000034613
ENSMUSG00000034641
ENSMUSG00000034648
ENSMUSG00000034652
ENSMUSG00000034663
ENSMUSG00000034708
ENSMUSG00000034765
ENSMUSG00000034773
ENSMUSG00000034780
ENSMUSG00000034792
ENSMUSG00000034807
ENSMUSG00000034839
ENSMUSG00000034854
ENSMUSG00000034855
ENSMUSG00000034883
ENSMUSG00000034906
ENSMUSG00000034947
ENSMUSG00000034959
ENSMUSG00000034993
ENSMUSG00000035004
ENSMUSG00000035045
ENSMUSG00000035062
ENSMUSG00000035158
ENSMUSG00000035184
ENSMUSG00000035186
ENSMUSG00000035199
ENSMUSG00000035208
ENSMUSG00000035212
ENSMUSG00000035232
ENSMUSG00000035273
ENSMUSG00000035274
ENSMUSG00000035296
ENSMUSG00000035299
ENSMUSG00000035352
ENSMUSG00000035365
ENSMUSG00000035372
ENSMUSG00000035373
ENSMUSG00000035385
ENSMUSG00000035413
ENSMUSG00000035439
ENSMUSG00000035448
ENSMUSG00000035455
ENSMUSG00000035459
ENSMUSG00000035493
ENSMUSG00000035561
ENSMUSG00000035678
ENSMUSG00000035683
ENSMUSG00000035692
ENSMUSG00000035697
ENSMUSG00000035704
ENSMUSG00000035711
ENSMUSG00000035778
ENSMUSG00000035891
ENSMUSG00000035914
ENSMUSG00000035929
ENSMUSG00000036053
ENSMUSG00000036067
ENSMUSG00000036086
ENSMUSG00000036103
ENSMUSG00000036136
ENSMUSG00000036155
ENSMUSG00000036172
ENSMUSG00000036223
ENSMUSG00000036249
ENSMUSG00000036353
ENSMUSG00000036356
ENSMUSG00000036362
ENSMUSG00000036381
ENSMUSG00000036390
ENSMUSG00000036438
ENSMUSG00000036469
ENSMUSG00000036526
ENSMUSG00000036545
ENSMUSG00000036553
ENSMUSG00000036565
ENSMUSG00000036585
ENSMUSG00000036587
ENSMUSG00000036606
ENSMUSG00000036611
ENSMUSG00000036622
ENSMUSG00000036655
ENSMUSG00000036672
ENSMUSG00000036718
ENSMUSG00000036743
ENSMUSG00000036766
ENSMUSG00000036768
ENSMUSG00000036769
ENSMUSG00000036777
ENSMUSG00000036853
ENSMUSG00000036875
ENSMUSG00000036887
ENSMUSG00000036894
ENSMUSG00000036896
ENSMUSG00000036902
ENSMUSG00000036905
ENSMUSG00000036908
ENSMUSG00000036918
ENSMUSG00000036931
ENSMUSG00000036943
ENSMUSG00000036944
ENSMUSG00000036960
ENSMUSG00000036964
ENSMUSG00000036985
ENSMUSG00000036992
ENSMUSG00000037035
ENSMUSG00000037060
ENSMUSG00000037086
ENSMUSG00000037148
ENSMUSG00000037185
ENSMUSG00000037217
ENSMUSG00000037224
ENSMUSG00000037280
ENSMUSG00000037306
ENSMUSG00000037313
ENSMUSG00000037318
ENSMUSG00000037337
ENSMUSG00000037341
ENSMUSG00000037347
ENSMUSG00000037370
ENSMUSG00000037379
ENSMUSG00000037405
ENSMUSG00000037411
ENSMUSG00000037419
ENSMUSG00000037466
ENSMUSG00000037474
ENSMUSG00000037509
ENSMUSG00000037544
ENSMUSG00000037568
ENSMUSG00000037572
ENSMUSG00000037580
ENSMUSG00000037636
ENSMUSG00000037649
ENSMUSG00000037725
ENSMUSG00000037731
ENSMUSG00000037735
ENSMUSG00000037816
ENSMUSG00000037846
ENSMUSG00000037849
ENSMUSG00000037855
ENSMUSG00000037860
ENSMUSG00000037868
ENSMUSG00000037902
ENSMUSG00000037913
ENSMUSG00000037921
ENSMUSG00000037946
ENSMUSG00000037994
ENSMUSG00000038005
ENSMUSG00000038034
ENSMUSG00000038059
ENSMUSG00000038147
ENSMUSG00000038151
ENSMUSG00000038168
ENSMUSG00000038179
ENSMUSG00000038239
ENSMUSG00000038331
ENSMUSG00000038352
ENSMUSG00000038370
ENSMUSG00000038379
ENSMUSG00000038403
ENSMUSG00000038456
ENSMUSG00000038508
ENSMUSG00000038524
ENSMUSG00000038578
ENSMUSG00000038608
ENSMUSG00000038612
ENSMUSG00000038618
ENSMUSG00000038623
ENSMUSG00000038633
ENSMUSG00000038642
ENSMUSG00000038644
ENSMUSG00000038650
ENSMUSG00000038670
ENSMUSG00000038702
ENSMUSG00000038712
ENSMUSG00000038732
ENSMUSG00000038775
ENSMUSG00000038843
ENSMUSG00000038910
ENSMUSG00000038943
ENSMUSG00000039005
ENSMUSG00000039055
ENSMUSG00000039062
ENSMUSG00000039116
ENSMUSG00000039145
ENSMUSG00000039153
ENSMUSG00000039158
ENSMUSG00000039187
ENSMUSG00000039191
ENSMUSG00000039193
ENSMUSG00000039206
ENSMUSG00000039208
ENSMUSG00000039217
ENSMUSG00000039232
ENSMUSG00000039234
ENSMUSG00000039294
ENSMUSG00000039396
ENSMUSG00000039405
ENSMUSG00000039457
ENSMUSG00000039497
ENSMUSG00000039518
ENSMUSG00000039529
ENSMUSG00000039578
ENSMUSG00000039621
ENSMUSG00000039646
ENSMUSG00000039699
ENSMUSG00000039747
ENSMUSG00000039748
ENSMUSG00000039774
ENSMUSG00000039782
ENSMUSG00000039783
ENSMUSG00000039809
ENSMUSG00000039853
ENSMUSG00000039883
ENSMUSG00000039934
ENSMUSG00000039936
ENSMUSG00000039959
ENSMUSG00000039981
ENSMUSG00000040007
ENSMUSG00000040010
ENSMUSG00000040026
ENSMUSG00000040035
ENSMUSG00000040061
ENSMUSG00000040084
ENSMUSG00000040133
ENSMUSG00000040152
ENSMUSG00000040204
ENSMUSG00000040212
ENSMUSG00000040229
ENSMUSG00000040249
ENSMUSG00000040322
ENSMUSG00000040329
ENSMUSG00000040339
ENSMUSG00000040345
ENSMUSG00000040350
ENSMUSG00000040479
ENSMUSG00000040522
ENSMUSG00000040528
ENSMUSG00000040552
ENSMUSG00000040594
ENSMUSG00000040613
ENSMUSG00000040616
ENSMUSG00000040659
ENSMUSG00000040675
ENSMUSG00000040690
ENSMUSG00000040694
ENSMUSG00000040711
ENSMUSG00000040722
ENSMUSG00000040747
ENSMUSG00000040751
ENSMUSG00000040809
ENSMUSG00000040836
ENSMUSG00000040855
ENSMUSG00000040907
ENSMUSG00000040964
ENSMUSG00000041064
ENSMUSG00000041084
ENSMUSG00000041112
ENSMUSG00000041219
ENSMUSG00000041245
ENSMUSG00000041272
ENSMUSG00000041313
ENSMUSG00000041324
ENSMUSG00000041390
ENSMUSG00000041406
ENSMUSG00000041431
ENSMUSG00000041476
ENSMUSG00000041481
ENSMUSG00000041498
ENSMUSG00000041515
ENSMUSG00000041552
ENSMUSG00000041642
ENSMUSG00000041649
ENSMUSG00000041695
ENSMUSG00000041707
ENSMUSG00000041734
ENSMUSG00000041737
ENSMUSG00000041779
ENSMUSG00000041809
ENSMUSG00000041827
ENSMUSG00000041836
ENSMUSG00000041845
ENSMUSG00000041859
ENSMUSG00000041889
ENSMUSG00000041920
ENSMUSG00000041957
ENSMUSG00000041959
ENSMUSG00000042029
ENSMUSG00000042129
ENSMUSG00000042156
ENSMUSG00000042182
ENSMUSG00000042190
ENSMUSG00000042225
ENSMUSG00000042228
ENSMUSG00000042254
ENSMUSG00000042256
ENSMUSG00000042265
ENSMUSG00000042286
ENSMUSG00000042292
ENSMUSG00000042331
ENSMUSG00000042333
ENSMUSG00000042349
ENSMUSG00000042351
ENSMUSG00000042379
ENSMUSG00000042401
ENSMUSG00000042404
ENSMUSG00000042489
ENSMUSG00000042498
ENSMUSG00000042607
ENSMUSG00000042622
ENSMUSG00000042684
ENSMUSG00000042717
ENSMUSG00000042724
ENSMUSG00000042734
ENSMUSG00000042751
ENSMUSG00000042817
ENSMUSG00000042834
ENSMUSG00000042842
ENSMUSG00000042895
ENSMUSG00000043004
ENSMUSG00000043017
ENSMUSG00000043091
ENSMUSG00000043157
ENSMUSG00000043263
ENSMUSG00000043336
ENSMUSG00000043421
ENSMUSG00000043557
ENSMUSG00000043587
ENSMUSG00000043613
ENSMUSG00000043671
ENSMUSG00000043740
ENSMUSG00000043832
ENSMUSG00000043895
ENSMUSG00000043939
ENSMUSG00000044042
ENSMUSG00000044086
ENSMUSG00000044103
ENSMUSG00000044162
ENSMUSG00000044201
ENSMUSG00000044258
ENSMUSG00000044350
ENSMUSG00000044469
ENSMUSG00000044551
ENSMUSG00000044583
ENSMUSG00000044646
ENSMUSG00000044702
ENSMUSG00000044703
ENSMUSG00000044734
ENSMUSG00000044768
ENSMUSG00000044770
ENSMUSG00000044811
ENSMUSG00000044827
ENSMUSG00000044867
ENSMUSG00000044948
ENSMUSG00000044951
ENSMUSG00000044966
ENSMUSG00000045031
ENSMUSG00000045065
ENSMUSG00000045136
ENSMUSG00000045165
ENSMUSG00000045273
ENSMUSG00000045287
ENSMUSG00000045306
ENSMUSG00000045312
ENSMUSG00000045322
ENSMUSG00000045328
ENSMUSG00000045382
ENSMUSG00000045404
ENSMUSG00000045569
ENSMUSG00000045658
ENSMUSG00000045664
ENSMUSG00000045667
ENSMUSG00000045679
ENSMUSG00000045751
ENSMUSG00000045763
ENSMUSG00000045838
ENSMUSG00000045903
ENSMUSG00000045932
ENSMUSG00000045934
ENSMUSG00000046006
ENSMUSG00000046080
ENSMUSG00000046167
ENSMUSG00000046169
ENSMUSG00000046179
ENSMUSG00000046186
ENSMUSG00000046223
ENSMUSG00000046245
ENSMUSG00000046295
ENSMUSG00000046318
ENSMUSG00000046323
ENSMUSG00000046402
ENSMUSG00000046410
ENSMUSG00000046432
ENSMUSG00000046523
ENSMUSG00000046561
ENSMUSG00000046591
ENSMUSG00000046688
ENSMUSG00000046711
ENSMUSG00000046718
ENSMUSG00000046722
ENSMUSG00000046727
ENSMUSG00000046805
ENSMUSG00000046818
ENSMUSG00000046841
ENSMUSG00000046961
ENSMUSG00000047139
ENSMUSG00000047180
ENSMUSG00000047342
ENSMUSG00000047343
ENSMUSG00000047407
ENSMUSG00000047414
ENSMUSG00000047415
ENSMUSG00000047419
ENSMUSG00000047462
ENSMUSG00000047534
ENSMUSG00000047557
ENSMUSG00000047592
ENSMUSG00000047746
ENSMUSG00000047798
ENSMUSG00000047878
ENSMUSG00000047881
ENSMUSG00000047945
ENSMUSG00000048080
ENSMUSG00000048120
ENSMUSG00000048126
ENSMUSG00000048163
ENSMUSG00000048216
ENSMUSG00000048251
ENSMUSG00000048327
ENSMUSG00000048388
ENSMUSG00000048416
ENSMUSG00000048497
ENSMUSG00000048498
ENSMUSG00000048521
ENSMUSG00000048534
ENSMUSG00000048572
ENSMUSG00000048612
ENSMUSG00000048621
ENSMUSG00000048677
ENSMUSG00000048779
ENSMUSG00000048807
ENSMUSG00000048865
ENSMUSG00000048922
ENSMUSG00000049001
ENSMUSG00000049037
ENSMUSG00000049103
ENSMUSG00000049109
ENSMUSG00000049112
ENSMUSG00000049130
ENSMUSG00000049134
ENSMUSG00000049526
ENSMUSG00000049539
ENSMUSG00000049598
ENSMUSG00000049625
ENSMUSG00000049643
ENSMUSG00000049687
ENSMUSG00000049723
ENSMUSG00000049744
ENSMUSG00000049775
ENSMUSG00000049848
ENSMUSG00000049866
ENSMUSG00000049871
ENSMUSG00000049872
ENSMUSG00000049904
ENSMUSG00000049907
ENSMUSG00000049932
ENSMUSG00000049939
ENSMUSG00000049988
ENSMUSG00000050022
ENSMUSG00000050107
ENSMUSG00000050315
ENSMUSG00000050335
ENSMUSG00000050350
ENSMUSG00000050379
ENSMUSG00000050410
ENSMUSG00000050493
ENSMUSG00000050578
ENSMUSG00000050587
ENSMUSG00000050592
ENSMUSG00000050708
ENSMUSG00000050721
ENSMUSG00000050921
ENSMUSG00000050931
ENSMUSG00000050936
ENSMUSG00000050967
ENSMUSG00000050989
ENSMUSG00000051048
ENSMUSG00000051074
ENSMUSG00000051212
ENSMUSG00000051220
ENSMUSG00000051225
ENSMUSG00000051278
ENSMUSG00000051314
ENSMUSG00000051344
ENSMUSG00000051354
ENSMUSG00000051378
ENSMUSG00000051435
ENSMUSG00000051439
ENSMUSG00000051444
ENSMUSG00000051457
ENSMUSG00000051498
ENSMUSG00000051506
ENSMUSG00000051517
ENSMUSG00000051627
ENSMUSG00000051650
ENSMUSG00000051735
ENSMUSG00000051748
ENSMUSG00000051855
ENSMUSG00000051951
ENSMUSG00000051969
ENSMUSG00000051998
ENSMUSG00000052013
ENSMUSG00000052087
ENSMUSG00000052125
ENSMUSG00000052142
ENSMUSG00000052160
ENSMUSG00000052212
ENSMUSG00000052270
ENSMUSG00000052298
ENSMUSG00000052336
ENSMUSG00000052384
ENSMUSG00000052397
ENSMUSG00000052477
ENSMUSG00000052565
ENSMUSG00000052681
ENSMUSG00000052684
ENSMUSG00000052688
ENSMUSG00000052749
ENSMUSG00000052760
ENSMUSG00000052776
ENSMUSG00000052821
ENSMUSG00000052889
ENSMUSG00000052942
ENSMUSG00000052949
ENSMUSG00000053040
ENSMUSG00000053044
ENSMUSG00000053049
ENSMUSG00000053063
ENSMUSG00000053093
ENSMUSG00000053101
ENSMUSG00000053113
ENSMUSG00000053158
ENSMUSG00000053192
ENSMUSG00000053279
ENSMUSG00000053318
ENSMUSG00000053398
ENSMUSG00000053475
ENSMUSG00000053519
ENSMUSG00000053553
ENSMUSG00000053581
ENSMUSG00000053687
ENSMUSG00000053746
ENSMUSG00000054115
ENSMUSG00000054196
ENSMUSG00000054203
ENSMUSG00000054293
ENSMUSG00000054342
ENSMUSG00000054400
ENSMUSG00000054408
ENSMUSG00000054428
ENSMUSG00000054510
ENSMUSG00000054520
ENSMUSG00000054545
ENSMUSG00000054556
ENSMUSG00000054640
ENSMUSG00000054675
ENSMUSG00000054702
ENSMUSG00000054717
ENSMUSG00000054871
ENSMUSG00000054944
ENSMUSG00000054951
ENSMUSG00000055069
ENSMUSG00000055184
ENSMUSG00000055413
ENSMUSG00000055435
ENSMUSG00000055447
ENSMUSG00000055489
ENSMUSG00000055541
ENSMUSG00000055612
ENSMUSG00000055745
ENSMUSG00000055805
ENSMUSG00000055994
ENSMUSG00000056054
ENSMUSG00000056069
ENSMUSG00000056071
ENSMUSG00000056124
ENSMUSG00000056130
ENSMUSG00000056145
ENSMUSG00000056201
ENSMUSG00000056220
ENSMUSG00000056290
ENSMUSG00000056328
ENSMUSG00000056394
ENSMUSG00000056413
ENSMUSG00000056498
ENSMUSG00000056515
ENSMUSG00000056529
ENSMUSG00000056708
ENSMUSG00000056737
ENSMUSG00000056758
ENSMUSG00000056832
ENSMUSG00000056888
ENSMUSG00000056900
ENSMUSG00000057003
ENSMUSG00000057058
ENSMUSG00000057191
ENSMUSG00000057329
ENSMUSG00000057335
ENSMUSG00000057346
ENSMUSG00000057506
ENSMUSG00000057561
ENSMUSG00000057596
ENSMUSG00000057604
ENSMUSG00000057719
ENSMUSG00000057766
ENSMUSG00000057895
ENSMUSG00000057948
ENSMUSG00000057967
ENSMUSG00000058056
ENSMUSG00000058099
ENSMUSG00000058126
ENSMUSG00000058163
ENSMUSG00000058290
ENSMUSG00000058385
ENSMUSG00000058427
ENSMUSG00000058470
ENSMUSG00000058624
ENSMUSG00000058672
ENSMUSG00000058715
ENSMUSG00000058743
ENSMUSG00000058773
ENSMUSG00000058794
ENSMUSG00000058799
ENSMUSG00000058818
ENSMUSG00000058835
ENSMUSG00000058914
ENSMUSG00000059060
ENSMUSG00000059089
ENSMUSG00000059201
ENSMUSG00000059326
ENSMUSG00000059456
ENSMUSG00000059479
ENSMUSG00000059498
ENSMUSG00000059588
ENSMUSG00000059741
ENSMUSG00000059791
ENSMUSG00000059901
ENSMUSG00000059923
ENSMUSG00000059994
ENSMUSG00000060044
ENSMUSG00000060063
ENSMUSG00000060090
ENSMUSG00000060093
ENSMUSG00000060131
ENSMUSG00000060147
ENSMUSG00000060216
ENSMUSG00000060244
ENSMUSG00000060509
ENSMUSG00000060519
ENSMUSG00000060550
ENSMUSG00000060594
ENSMUSG00000060600
ENSMUSG00000060639
ENSMUSG00000060791
ENSMUSG00000060802
ENSMUSG00000060950
ENSMUSG00000061119
ENSMUSG00000061132
ENSMUSG00000061175
ENSMUSG00000061288
ENSMUSG00000061371
ENSMUSG00000061414
ENSMUSG00000061533
ENSMUSG00000061535
ENSMUSG00000061577
ENSMUSG00000061615
ENSMUSG00000061666
ENSMUSG00000061723
ENSMUSG00000061878
ENSMUSG00000061991
ENSMUSG00000062007
ENSMUSG00000062077
ENSMUSG00000062082
ENSMUSG00000062127
ENSMUSG00000062248
ENSMUSG00000062345
ENSMUSG00000062380
ENSMUSG00000062488
ENSMUSG00000062510
ENSMUSG00000062585
ENSMUSG00000062593
ENSMUSG00000062609
ENSMUSG00000062661
ENSMUSG00000062727
ENSMUSG00000062753
ENSMUSG00000062825
ENSMUSG00000062939
ENSMUSG00000062991
ENSMUSG00000063018
ENSMUSG00000063021
ENSMUSG00000063142
ENSMUSG00000063160
ENSMUSG00000063193
ENSMUSG00000063245
ENSMUSG00000063383
ENSMUSG00000063415
ENSMUSG00000063430
ENSMUSG00000063445
ENSMUSG00000063458
ENSMUSG00000063506
ENSMUSG00000063632
ENSMUSG00000064043
ENSMUSG00000064065
ENSMUSG00000064080
ENSMUSG00000064168
ENSMUSG00000064179
ENSMUSG00000064267
ENSMUSG00000064288
ENSMUSG00000064417
ENSMUSG00000064797
ENSMUSG00000064899
ENSMUSG00000064923
ENSMUSG00000064936
ENSMUSG00000064968
ENSMUSG00000065422
ENSMUSG00000065471
ENSMUSG00000065475
ENSMUSG00000065735
ENSMUSG00000065820
ENSMUSG00000065822
ENSMUSG00000065870
ENSMUSG00000065905
ENSMUSG00000065922
ENSMUSG00000066057
ENSMUSG00000066361
ENSMUSG00000066456
ENSMUSG00000066510
ENSMUSG00000066677
ENSMUSG00000066684
ENSMUSG00000066705
ENSMUSG00000066800
ENSMUSG00000066861
ENSMUSG00000067149
ENSMUSG00000067212
ENSMUSG00000067297
ENSMUSG00000067377
ENSMUSG00000067455
ENSMUSG00000067610
ENSMUSG00000067649
ENSMUSG00000067786
ENSMUSG00000067916
ENSMUSG00000068101
ENSMUSG00000068129
ENSMUSG00000068196
ENSMUSG00000068227
ENSMUSG00000068245
ENSMUSG00000068246
ENSMUSG00000068335
ENSMUSG00000068566
ENSMUSG00000068697
ENSMUSG00000068699
ENSMUSG00000068744
ENSMUSG00000069265
ENSMUSG00000069266
ENSMUSG00000069267
ENSMUSG00000069268
ENSMUSG00000069270
ENSMUSG00000069274
ENSMUSG00000069300
ENSMUSG00000069301
ENSMUSG00000069302
ENSMUSG00000069305
ENSMUSG00000069308
ENSMUSG00000069309
ENSMUSG00000069310
ENSMUSG00000069372
ENSMUSG00000069515
ENSMUSG00000069516
ENSMUSG00000069607
ENSMUSG00000069662
ENSMUSG00000069792
ENSMUSG00000069793
ENSMUSG00000069830
ENSMUSG00000069833
ENSMUSG00000069893
ENSMUSG00000069910
ENSMUSG00000069920
ENSMUSG00000070000
ENSMUSG00000070031
ENSMUSG00000070034
ENSMUSG00000070323
ENSMUSG00000070348
ENSMUSG00000070354
ENSMUSG00000070369
ENSMUSG00000070385
ENSMUSG00000070390
ENSMUSG00000070605
ENSMUSG00000070691
ENSMUSG00000070732
ENSMUSG00000070867
ENSMUSG00000070868
ENSMUSG00000071001
ENSMUSG00000071068
ENSMUSG00000071076
ENSMUSG00000071078
ENSMUSG00000071203
ENSMUSG00000071317
ENSMUSG00000071379
ENSMUSG00000071516
ENSMUSG00000071540
ENSMUSG00000071547
ENSMUSG00000071713
ENSMUSG00000071714
ENSMUSG00000071715
ENSMUSG00000071716
ENSMUSG00000071724
ENSMUSG00000071847
ENSMUSG00000072082
ENSMUSG00000072109
ENSMUSG00000072214
ENSMUSG00000072235
ENSMUSG00000072437
ENSMUSG00000072596
ENSMUSG00000072620
ENSMUSG00000072774
ENSMUSG00000072812
ENSMUSG00000072844
ENSMUSG00000072875
ENSMUSG00000072980
ENSMUSG00000073242
ENSMUSG00000073274
ENSMUSG00000073374
ENSMUSG00000073375
ENSMUSG00000073409
ENSMUSG00000073411
ENSMUSG00000073412
ENSMUSG00000073421
ENSMUSG00000073482
ENSMUSG00000073489
ENSMUSG00000073490
ENSMUSG00000073491
ENSMUSG00000073492
ENSMUSG00000073514
ENSMUSG00000073538
ENSMUSG00000073555
ENSMUSG00000073565
ENSMUSG00000073678
ENSMUSG00000073771
ENSMUSG00000073795
ENSMUSG00000073802
ENSMUSG00000073982
ENSMUSG00000074001
ENSMUSG00000074063
ENSMUSG00000074141
ENSMUSG00000074151
ENSMUSG00000074220
ENSMUSG00000074277
ENSMUSG00000074345
ENSMUSG00000074361
ENSMUSG00000074403
ENSMUSG00000074417
ENSMUSG00000074419
ENSMUSG00000074476
ENSMUSG00000074497
ENSMUSG00000074505
ENSMUSG00000074570
ENSMUSG00000074578
[truncated: 402 more rows]

## Sheet: ORA_results
p-value	q-value	term_goid	term_category	term_level	term_name	members_input_overlap	members_input_overlap_geneids	size	effective_size
1.23492e-49	1.66962e-46	GO:0002684	b	4	positive regulation of immune system process	21898; 105855; 623121; 54725; 66824; 101488212; 230979; 56792; 100340; 68119; 16822; 68891; 102657; 332579; 70450; 234311; 210757; 70839; 11820; 234779; 50723; 71481; 71660; 71693; 279572; 12047; 268973; 170743; 170744; 629871; 171285; 630146; 77777; 12262; 14456; 434341; 237877; 74048; 74131; 12394; 238377; 238447; 100689; 239081; 102639543; 214763; 50931; 83433; 629845; 240754; 11486; 404711; 1…	ENSMUSG00000099974; ENSMUSG00000033721; ENSMUSG00000051998; ENSMUSG00000059498; ENSMUSG00000067377; ENSMUSG00000003873; ENSMUSG00000028028; ENSMUSG00000026656; ENSMUSG00000031101; ENSMUSG00000026536; ENSMUSG00000027544; ENSMUSG00000089669; ENSMUSG00000042190; ENSMUSG00000076695; ENSMUSG00000022303; ENSMUSG00000016529; ENSMUSG00000036887; ENSMUSG00000045322; ENSMUSG00000018500; ENSMUSG00000090231;…	1074	1058
3.58332e-47	2.42233e-44	GO:0006954	b	4	inflammatory response	21898; 13051; 54598; 66824; 56792; 100340; 11801; 232174; 84112; 69146; 66190; 109901; 69769; 102657; 17951; 70450; 11820; 71660; 279572; 268857; 268973; 170743; 170744; 72461; 394436; 171285; 74603; 74748; 239081; 12655; 239849; 11486; 11501; 11513; 11541; 11629; 109934; 11689; 11690; 11815; 12182; 12229; 12267; 12273; 12362; 12363; 12475; 12484; 12487; 12505; 12511; 12702; 12759; 12768; 12771; …	ENSMUSG00000040249; ENSMUSG00000059498; ENSMUSG00000031264; ENSMUSG00000026656; ENSMUSG00000039145; ENSMUSG00000055994; ENSMUSG00000042190; ENSMUSG00000016529; ENSMUSG00000017631; ENSMUSG00000018500; ENSMUSG00000015854; ENSMUSG00000037405; ENSMUSG00000045322; ENSMUSG00000061119; ENSMUSG00000042228; ENSMUSG00000042286; ENSMUSG00000053113; ENSMUSG00000035373; ENSMUSG00000004698; ENSMUSG00000001131;…	687	685
2.85173e-41	1.28518e-38	GO:0001817	b	4	regulation of cytokine production	21898; 105855; 54725; 13051; 66824; 66889; 230979; 56807; 232414; 69146; 69550; 102657; 17951; 332579; 234311; 11820; 234779; 50723; 268857; 170743; 170744; 171285; 77777; 14456; 55991; 74048; 74131; 170740; 23845; 12394; 100689; 12481; 140497; 214763; 50931; 11501; 11513; 11541; 11746; 11815; 11829; 11846; 12010; 12189; 12229; 12267; 12273; 12362; 12363; 12475; 12484; 12487; 12511; 12522; 12523;…	ENSMUSG00000040249; ENSMUSG00000059498; ENSMUSG00000067377; ENSMUSG00000031264; ENSMUSG00000026656; ENSMUSG00000031101; ENSMUSG00000042190; ENSMUSG00000016529; ENSMUSG00000018500; ENSMUSG00000045322; ENSMUSG00000027843; ENSMUSG00000004266; ENSMUSG00000017146; ENSMUSG00000026395; ENSMUSG00000058914; ENSMUSG00000069830; ENSMUSG00000074361; ENSMUSG00000020275; ENSMUSG00000006014; ENSMUSG00000015340;…	652	651
1.18992e-40	4.02192e-38	GO:0016477	b	4	cell migration	16419; 105855; 230098; 218581; 13051; 66824; 230979; 56792; 67141; 67263; 68169; 100952; 68588; 68743; 68792; 68891; 66102; 69550; 332397; 70415; 70839; 11820; 104943; 71660; 71805; 71877; 399558; 277360; 72404; 269016; 72461; 270120; 270152; 50490; 14456; 237542; 73710; 74012; 74048; 74117; 74194; 94352; 192662; 74748; 74762; 140570; 140580; 107895; 12550; 108101; 76709; 75458; 67220; 233571; 12…	ENSMUSG00000033721; ENSMUSG00000040249; ENSMUSG00000032939; ENSMUSG00000027460; ENSMUSG00000003873; ENSMUSG00000048251; ENSMUSG00000031380; ENSMUSG00000028480; ENSMUSG00000039145; ENSMUSG00000015829; ENSMUSG00000027544; ENSMUSG00000021665; ENSMUSG00000025856; ENSMUSG00000021262; ENSMUSG00000042190; ENSMUSG00000074785; ENSMUSG00000057719; ENSMUSG00000031465; ENSMUSG00000025351; ENSMUSG00000030562;…	1427	1426
2.03239e-39	5.10537e-37	GO:0050776	b	4	regulation of immune response	21898; 105855; 623121; 54725; 66824; 230979; 56792; 100340; 67742; 68119; 16822; 232413; 68891; 208154; 69550; 102657; 332579; 70450; 234311; 210757; 234779; 50723; 71481; 71693; 279572; 268857; 12047; 268973; 170743; 170744; 629871; 171285; 77777; 12262; 434341; 237877; 74048; 74131; 238447; 100689; 74748; 239081; 102639543; 214763; 50931; 629845; 240754; 11486; 404711; 11501; 11513; 11541; 1099…	ENSMUSG00000099974; ENSMUSG00000033721; ENSMUSG00000051998; ENSMUSG00000059498; ENSMUSG00000067377; ENSMUSG00000003873; ENSMUSG00000028028; ENSMUSG00000026656; ENSMUSG00000031101; ENSMUSG00000027639; ENSMUSG00000027544; ENSMUSG00000015355; ENSMUSG00000042190; ENSMUSG00000076695; ENSMUSG00000016529; ENSMUSG00000036887; ENSMUSG00000045322; ENSMUSG00000017631; ENSMUSG00000030577; ENSMUSG00000018500;…	893	878
2.2657e-39	5.10537e-37	GO:0048584	b	4	positive regulation of response to stimulus	21898; 105855; 623121; 54722; 54725; 218581; 13051; 66713; 66824; 230979; 56792; 67397; 100340; 330177; 68119; 16822; 84112; 68891; 233046; 102657; 215114; 332579; 234311; 234396; 100504518; 210757; 110075; 70839; 11820; 234779; 104943; 50723; 71481; 71660; 71693; 279572; 71805; 11983; 12047; 268973; 269016; 170743; 170744; 170799; 72607; 215653; 12125; 629871; 171285; 77777; 94176; 50490; 12262;…	ENSMUSG00000033721; ENSMUSG00000059498; ENSMUSG00000003873; ENSMUSG00000028028; ENSMUSG00000053192; ENSMUSG00000030117; ENSMUSG00000042190; ENSMUSG00000027381; ENSMUSG00000042349; ENSMUSG00000030447; ENSMUSG00000016529; ENSMUSG00000030562; ENSMUSG00000030560; ENSMUSG00000037405; ENSMUSG00000045322; ENSMUSG00000027843; ENSMUSG00000017146; ENSMUSG00000048779; ENSMUSG00000074361; ENSMUSG00000045136;…	2333	2319
3.1735e-38	6.12938e-36	GO:0046649	b	4	lymphocyte activation	21898; 105855; 229499; 328833; 66824; 230979; 67742; 16411; 232174; 208154; 69769; 102545; 102657; 70450; 234396; 210757; 234779; 11891; 50723; 277360; 268857; 12047; 629871; 171285; 77777; 94176; 270152; 14456; 237877; 74048; 74131; 12393; 12394; 238447; 74732; 74734; 74748; 12481; 75345; 75974; 214763; 50931; 629845; 240754; 11486; 404711; 11501; 11629; 11846; 12010; 12028; 12043; 12142; 12182;…	ENSMUSG00000099974; ENSMUSG00000033721; ENSMUSG00000051998; ENSMUSG00000003873; ENSMUSG00000031264; ENSMUSG00000046295; ENSMUSG00000026656; ENSMUSG00000031101; ENSMUSG00000027544; ENSMUSG00000038151; ENSMUSG00000036587; ENSMUSG00000000861; ENSMUSG00000076695; ENSMUSG00000016529; ENSMUSG00000029204; ENSMUSG00000010142; ENSMUSG00000030577; ENSMUSG00000018168; ENSMUSG00000037405; ENSMUSG00000021948;…	845	831
1.53631e-35	2.59636e-33	GO:0048522	b	4	positive regulation of cellular process	98496; 225872; 21898; 229841; 105855; 98878; 54722; 66197; 54725; 230098; 218581; 13051; 66573; 66713; 54598; 66824; 67052; 101488212; 230979; 56792; 67141; 67177; 67397; 67399; 100182; 67557; 56807; 67628; 231633; 16765; 76843; 11308; 104156; 330177; 68040; 68119; 16822; 68169; 100952; 232174; 232414; 68588; 68612; 68743; 68792; 68891; 66102; 69146; 233046; 69263; 66190; 109901; 69585; 69745; 69…	ENSMUSG00000033721; ENSMUSG00000059498; ENSMUSG00000003873; ENSMUSG00000028028; ENSMUSG00000029516; ENSMUSG00000026532; ENSMUSG00000053192; ENSMUSG00000058624; ENSMUSG00000030117; ENSMUSG00000042190; ENSMUSG00000027381; ENSMUSG00000042349; ENSMUSG00000030447; ENSMUSG00000016529; ENSMUSG00000030562; ENSMUSG00000030560; ENSMUSG00000041272; ENSMUSG00000037405; ENSMUSG00000045322; ENSMUSG00000027843;…	5487	5471
3.04522e-35	4.5746e-33	GO:0002274	b	4	myeloid leukocyte activation	21898; 13051; 66824; 56792; 16822; 84112; 68891; 70450; 11820; 170741; 170743; 170744; 171285; 77777; 94176; 74481; 74732; 74734; 11541; 11629; 109934; 11745; 12229; 12362; 12493; 12506; 12523; 12759; 12772; 12802; 24088; 14125; 14127; 14130; 14131; 14159; 14191; 14289; 15368; 16153; 16165; 16173; 16174; 16190; 81897; 16409; 16414; 16476; 16803; 16835; 246256; 17082; 17096; 246746; 17394; 17474; …	ENSMUSG00000059498; ENSMUSG00000031264; ENSMUSG00000026656; ENSMUSG00000015355; ENSMUSG00000016529; ENSMUSG00000029204; ENSMUSG00000017631; ENSMUSG00000018500; ENSMUSG00000021948; ENSMUSG00000045322; ENSMUSG00000039699; ENSMUSG00000059089; ENSMUSG00000034652; ENSMUSG00000040528; ENSMUSG00000030579; ENSMUSG00000042228; ENSMUSG00000000982; ENSMUSG00000040152; ENSMUSG00000052212; ENSMUSG00000033467;…	207	206
7.13312e-34	9.64398e-32	GO:0080134	b	4	regulation of response to stress	21898; 623121; 54725; 13051; 66713; 54598; 66824; 56792; 67141; 67397; 100340; 330177; 84112; 235505; 69769; 69885; 102657; 233781; 102871; 70415; 332579; 234311; 234396; 11820; 71481; 104271; 279572; 71805; 268857; 268973; 269016; 170743; 170744; 72607; 215653; 171285; 77777; 434341; 237877; 74041; 74603; 74748; 74777; 239081; 75317; 102639543; 239849; 214763; 72828; 11486; 11501; 11513; 11541; …	ENSMUSG00000040249; ENSMUSG00000032939; ENSMUSG00000059498; ENSMUSG00000067377; ENSMUSG00000003873; ENSMUSG00000028028; ENSMUSG00000046295; ENSMUSG00000026656; ENSMUSG00000015829; ENSMUSG00000025856; ENSMUSG00000042349; ENSMUSG00000057719; ENSMUSG00000019997; ENSMUSG00000045322; ENSMUSG00000029616; ENSMUSG00000018500; ENSMUSG00000050989; ENSMUSG00000056054; ENSMUSG00000021948; ENSMUSG00000031264;…	1306	1303
1.71248e-33	2.10479e-31	GO:0007010	b	4	cytoskeleton organization	76478; 16419; 229841; 105855; 66311; 66442; 66468; 66713; 66824; 67052; 56792; 67141; 67399; 264134; 16765; 11308; 67951; 231830; 232201; 68743; 68802; 233199; 69550; 50874; 69885; 70218; 70385; 215114; 71409; 104252; 268396; 71819; 71877; 71924; 277360; 268697; 72119; 432572; 241431; 170643; 72754; 80986; 105988; 171580; 100048534; 94176; 50490; 237436; 73710; 17754; 74117; 74194; 66985; 192662;…	ENSMUSG00000040249; ENSMUSG00000069910; ENSMUSG00000028678; ENSMUSG00000013936; ENSMUSG00000018965; ENSMUSG00000022831; ENSMUSG00000029516; ENSMUSG00000027469; ENSMUSG00000045031; ENSMUSG00000045328; ENSMUSG00000033949; ENSMUSG00000025856; ENSMUSG00000058624; ENSMUSG00000021262; ENSMUSG00000030447; ENSMUSG00000004665; ENSMUSG00000022565; ENSMUSG00000029204; ENSMUSG00000036438; ENSMUSG00000030562;…	1337	1337
5.60374e-32	6.31355e-30	GO:0050865	b	4	regulation of cell activation	21898; 105855; 66824; 230979; 56792; 67742; 100952; 232174; 68891; 208154; 69769; 102657; 70450; 234396; 11820; 50723; 629871; 171285; 77777; 14456; 237877; 74048; 74131; 12394; 238447; 74748; 75345; 214763; 50931; 629845; 72828; 240754; 11486; 404711; 11501; 11541; 11629; 109934; 11846; 12043; 12142; 12182; 12229; 12399; 12400; 110785; 12483; 12484; 12487; 12493; 12504; 12505; 12511; 12519; 1252…	ENSMUSG00000033721; ENSMUSG00000051998; ENSMUSG00000031264; ENSMUSG00000046295; ENSMUSG00000026656; ENSMUSG00000031101; ENSMUSG00000027544; ENSMUSG00000038151; ENSMUSG00000025856; ENSMUSG00000076695; ENSMUSG00000016529; ENSMUSG00000019997; ENSMUSG00000017631; ENSMUSG00000019987; ENSMUSG00000018500; ENSMUSG00000018168; ENSMUSG00000021948; ENSMUSG00000045322; ENSMUSG00000027843; ENSMUSG00000004266;…	694	680
7.71213e-32	8.02061e-30	GO:0032101	b	4	regulation of response to external stimulus	21898; 105855; 13051; 54598; 66824; 56792; 67263; 100340; 84112; 235505; 69769; 102657; 233781; 234311; 70839; 11820; 71660; 268857; 12140; 171285; 14456; 73710; 74603; 74748; 239849; 214763; 72828; 11486; 11501; 11513; 11541; 11601; 11629; 109934; 11690; 11747; 11815; 11846; 12182; 12229; 12267; 12273; 12306; 12317; 12362; 12484; 12487; 12493; 12505; 12511; 12523; 12527; 12702; 12767; 12768; 127…	ENSMUSG00000040249; ENSMUSG00000059498; ENSMUSG00000067377; ENSMUSG00000031264; ENSMUSG00000051212; ENSMUSG00000026656; ENSMUSG00000039145; ENSMUSG00000015829; ENSMUSG00000025856; ENSMUSG00000042190; ENSMUSG00000016529; ENSMUSG00000031465; ENSMUSG00000036585; ENSMUSG00000017631; ENSMUSG00000018500; ENSMUSG00000021948; ENSMUSG00000045322; ENSMUSG00000027843; ENSMUSG00000057967; ENSMUSG00000053113;…	750	749
1.78334e-31	1.7222e-29	GO:0071310	b	4	cellular response to organic substance	240327; 98496; 16419; 225872; 21898; 623121; 98878; 66141; 54722; 112419; 13051; 230514; 66713; 54598; 66824; 56792; 67972; 104174; 60504; 100952; 232174; 226101; 66102; 68939; 232975; 235505; 69585; 70839; 11820; 667214; 667370; 104252; 71660; 11951; 399558; 268697; 432555; 74249; 72461; 433294; 394436; 171285; 236900; 433766; 50490; 14456; 237542; 12289; 12292; 106572; 434341; 74041; 74048; 237…	ENSMUSG00000003873; ENSMUSG00000059089; ENSMUSG00000030536; ENSMUSG00000059326; ENSMUSG00000030117; ENSMUSG00000030447; ENSMUSG00000016529; ENSMUSG00000031465; ENSMUSG00000045322; ENSMUSG00000030562; ENSMUSG00000037405; ENSMUSG00000022831; ENSMUSG00000027843; ENSMUSG00000040907; ENSMUSG00000030844; ENSMUSG00000068227; ENSMUSG00000018774; ENSMUSG00000017146; ENSMUSG00000004698; ENSMUSG00000048779;…	2376	2358
3.86504e-30	3.48369e-28	GO:0034097	b	4	response to cytokine	240327; 98496; 21898; 623121; 66107; 66141; 54722; 112419; 13051; 66713; 66824; 56792; 104174; 60504; 66102; 69550; 70789; 667214; 667370; 104252; 432555; 74249; 14456; 434341; 74041; 74117; 74186; 74732; 102639543; 76074; 50931; 83433; 240328; 240690; 11465; 11629; 11687; 11829; 11846; 667373; 12043; 12189; 12229; 12332; 12362; 12363; 12370; 12475; 12484; 12504; 12505; 12631; 12702; 12721; 12767…	ENSMUSG00000026712; ENSMUSG00000031264; ENSMUSG00000059326; ENSMUSG00000021262; ENSMUSG00000022303; ENSMUSG00000037405; ENSMUSG00000022831; ENSMUSG00000004266; ENSMUSG00000051650; ENSMUSG00000022367; ENSMUSG00000068227; ENSMUSG00000053113; ENSMUSG00000028581; ENSMUSG00000017146; ENSMUSG00000060509; ENSMUSG00000026395; ENSMUSG00000028927; ENSMUSG00000038612; ENSMUSG00000039232; ENSMUSG00000020275;…	926	925
5.7248e-29	4.83746e-27	GO:0042110	b	4	T cell activation	105855; 328833; 66824; 230979; 16411; 232174; 208154; 69769; 102657; 234396; 210757; 11891; 50723; 277360; 268857; 12047; 171285; 94176; 270152; 74048; 74131; 12393; 12394; 74732; 74734; 12481; 214763; 240754; 11486; 11501; 11629; 11846; 12010; 12028; 12043; 12142; 12399; 12400; 12484; 12487; 12504; 12505; 12506; 12511; 12519; 12522; 12524; 12721; 12767; 12772; 209488; 13024; 13813; 14087; 14127;…	ENSMUSG00000099974; ENSMUSG00000051998; ENSMUSG00000003873; ENSMUSG00000048251; ENSMUSG00000046295; ENSMUSG00000028633; ENSMUSG00000031101; ENSMUSG00000038151; ENSMUSG00000036587; ENSMUSG00000000861; ENSMUSG00000029204; ENSMUSG00000037405; ENSMUSG00000027843; ENSMUSG00000004266; ENSMUSG00000031103; ENSMUSG00000034652; ENSMUSG00000019843; ENSMUSG00000052142; ENSMUSG00000026395; ENSMUSG00000039232;…	496	495
8.37059e-29	6.65708e-27	GO:0002694	b	4	regulation of leukocyte activation	21898; 105855; 66824; 230979; 56792; 67742; 232174; 68891; 208154; 69769; 102657; 70450; 234396; 11820; 50723; 629871; 171285; 77777; 14456; 237877; 74048; 74131; 12394; 238447; 74748; 75345; 214763; 50931; 629845; 240754; 11486; 404711; 11501; 11541; 11629; 109934; 11846; 12043; 12142; 12182; 12229; 12399; 12400; 110785; 12483; 12484; 12487; 12493; 12504; 12505; 12511; 12519; 12522; 12523; 12524…	ENSMUSG00000033721; ENSMUSG00000051998; ENSMUSG00000031264; ENSMUSG00000046295; ENSMUSG00000026656; ENSMUSG00000031101; ENSMUSG00000027544; ENSMUSG00000038151; ENSMUSG00000076695; ENSMUSG00000016529; ENSMUSG00000017631; ENSMUSG00000019987; ENSMUSG00000018500; ENSMUSG00000018168; ENSMUSG00000045322; ENSMUSG00000027843; ENSMUSG00000004266; ENSMUSG00000076617; ENSMUSG00000034652; ENSMUSG00000076612;…	653	639
1.95643e-28	1.4695e-26	GO:0002521	b	4	leukocyte differentiation	65963; 105855; 101488212; 232174; 235505; 102545; 234396; 210757; 70809; 11820; 234779; 277360; 12047; 170741; 215653; 630146; 94176; 12262; 14456; 74048; 74131; 12393; 12394; 74481; 74511; 238377; 74734; 74748; 75974; 83433; 72828; 11486; 11501; 12010; 12028; 12043; 12142; 12229; 12306; 12370; 12399; 12400; 12484; 12487; 12504; 12505; 12522; 12768; 12772; 12977; 12978; 13024; 24088; 13813; 14087…	ENSMUSG00000099974; ENSMUSG00000038151; ENSMUSG00000003873; ENSMUSG00000031264; ENSMUSG00000046295; ENSMUSG00000031101; ENSMUSG00000025854; ENSMUSG00000032446; ENSMUSG00000000861; ENSMUSG00000029204; ENSMUSG00000045322; ENSMUSG00000018168; ENSMUSG00000039883; ENSMUSG00000022831; ENSMUSG00000027843; ENSMUSG00000004266; ENSMUSG00000023367; ENSMUSG00000039699; ENSMUSG00000004698; ENSMUSG00000076617;…	571	571
4.03805e-28	2.87339e-26	GO:2000145	b	4	regulation of cell motility	105855; 230098; 13051; 66824; 230979; 56792; 67141; 67263; 100952; 68792; 66102; 69550; 70415; 70839; 11820; 104943; 71660; 399558; 277360; 72404; 269016; 72461; 50490; 14456; 237542; 74012; 74048; 74117; 74194; 192662; 74748; 73420; 140559; 140570; 107895; 12550; 108101; 76709; 233571; 12798; 240641; 11486; 67451; 11501; 11541; 11601; 11602; 11629; 109934; 114715; 11745; 11747; 11815; 11853; 118…	ENSMUSG00000040249; ENSMUSG00000027460; ENSMUSG00000028063; ENSMUSG00000028480; ENSMUSG00000039145; ENSMUSG00000025856; ENSMUSG00000021262; ENSMUSG00000042190; ENSMUSG00000074785; ENSMUSG00000057719; ENSMUSG00000031465; ENSMUSG00000025351; ENSMUSG00000030562; ENSMUSG00000018500; ENSMUSG00000037405; ENSMUSG00000027843; ENSMUSG00000026697; ENSMUSG00000061119; ENSMUSG00000022367; ENSMUSG00000041498;…	930	929
1.4218e-27	9.61134e-26	GO:0060326	b	4	cell chemotaxis	105855; 13051; 56792; 66102; 71660; 277360; 270152; 14456; 74748; 75458; 11501; 668218; 11629; 12182; 12267; 12273; 12317; 12721; 12767; 12768; 12771; 12772; 12774; 12802; 12977; 12986; 14068; 14127; 14131; 14164; 14172; 14205; 14289; 14747; 14825; 15200; 15234; 15945; 16172; 16176; 16181; 16409; 16414; 16803; 16854; 16952; 17096; 17700; 17925; 18600; 18654; 18753; 18761; 18787; 19141; 19229; 192…	ENSMUSG00000033721; ENSMUSG00000059498; ENSMUSG00000039145; ENSMUSG00000042190; ENSMUSG00000021948; ENSMUSG00000057967; ENSMUSG00000054400; ENSMUSG00000060509; ENSMUSG00000074361; ENSMUSG00000058427; ENSMUSG00000021190; ENSMUSG00000004677; ENSMUSG00000027398; ENSMUSG00000042228; ENSMUSG00000009185; ENSMUSG00000000982; ENSMUSG00000022488; ENSMUSG00000040152; ENSMUSG00000014599; ENSMUSG00000056071;…	311	311
1.78928e-27	1.15196e-25	GO:0051270	b	4	regulation of cellular component movement	105855; 230098; 13051; 66824; 230979; 56792; 67141; 67263; 16765; 100952; 68792; 66102; 69550; 70415; 70839; 11820; 104943; 71660; 399558; 277360; 72404; 269016; 72461; 50490; 14456; 237542; 73710; 74012; 74048; 74117; 74194; 192662; 74748; 73420; 140559; 140570; 107895; 12550; 108101; 76709; 233571; 12798; 240641; 109711; 11486; 67451; 11501; 11541; 11601; 11602; 11629; 109934; 114715; 11745; 11…	ENSMUSG00000040249; ENSMUSG00000027460; ENSMUSG00000028063; ENSMUSG00000028480; ENSMUSG00000039145; ENSMUSG00000025856; ENSMUSG00000021262; ENSMUSG00000042190; ENSMUSG00000074785; ENSMUSG00000057719; ENSMUSG00000031465; ENSMUSG00000025351; ENSMUSG00000030562; ENSMUSG00000018500; ENSMUSG00000037405; ENSMUSG00000027843; ENSMUSG00000026697; ENSMUSG00000061119; ENSMUSG00000022367; ENSMUSG00000041498;…	1014	1013
2.56089e-27	1.57378e-25	GO:0051240	b	4	positive regulation of multicellular organismal process	21898; 105855; 54725; 13051; 66713; 66824; 101488212; 67092; 230979; 67141; 67399; 56807; 231633; 104156; 68169; 232174; 232414; 68588; 68792; 69146; 69178; 109901; 102657; 17951; 332579; 234311; 70839; 11820; 234779; 50723; 11951; 268396; 399558; 268697; 170743; 170744; 171285; 630146; 77777; 14456; 73710; 55991; 237877; 74048; 74117; 74131; 23845; 12393; 12394; 238377; 94352; 100689; 12481; 140…	ENSMUSG00000040249; ENSMUSG00000000078; ENSMUSG00000027460; ENSMUSG00000067377; ENSMUSG00000003873; ENSMUSG00000022831; ENSMUSG00000028063; ENSMUSG00000022150; ENSMUSG00000031101; ENSMUSG00000005958; ENSMUSG00000025854; ENSMUSG00000031486; ENSMUSG00000025856; ENSMUSG00000029322; ENSMUSG00000000861; ENSMUSG00000042190; ENSMUSG00000074785; ENSMUSG00000037035; ENSMUSG00000018654; ENSMUSG00000030447;…	1890	1889
7.39366e-27	4.34618e-25	GO:0048534	b	4	hematopoietic or lymphoid organ development	65963; 105855; 101488212; 67138; 56792; 11308; 232174; 68743; 235505; 102545; 234396; 210757; 70809; 11820; 234779; 71602; 11983; 277360; 71988; 104759; 12047; 170741; 170799; 215653; 12125; 630146; 94176; 12262; 14456; 74041; 74048; 74131; 23845; 12393; 12394; 74481; 74511; 238377; 74734; 74748; 75974; 76044; 83433; 72828; 12798; 109711; 11486; 11501; 11601; 11733; 12010; 12028; 12043; 12142; 12…	ENSMUSG00000099974; ENSMUSG00000038151; ENSMUSG00000003873; ENSMUSG00000031264; ENSMUSG00000046295; ENSMUSG00000026532; ENSMUSG00000031101; ENSMUSG00000042029; ENSMUSG00000025854; ENSMUSG00000036587; ENSMUSG00000000861; ENSMUSG00000027381; ENSMUSG00000018654; ENSMUSG00000004665; ENSMUSG00000029204; ENSMUSG00000045322; ENSMUSG00000010142; ENSMUSG00000018168; ENSMUSG00000064288; ENSMUSG00000022831;…	971	969
1.68766e-26	9.50713e-25	GO:0002683	b	4	negative regulation of immune system process	65963; 230979; 56792; 100340; 67742; 100952; 208154; 69550; 69769; 102657; 70809; 268857; 170741; 171285; 12262; 434341; 74048; 12394; 74511; 238377; 74748; 76044; 50931; 72828; 240754; 11486; 109934; 11687; 11815; 11846; 12229; 12399; 12400; 12483; 12484; 12493; 12505; 12519; 12523; 12524; 12768; 12772; 12802; 14127; 14130; 14255; 237256; 243910; 14961; 14991; 15040; 15170; 80782; 15368; 16000; …	ENSMUSG00000051998; ENSMUSG00000067377; ENSMUSG00000031264; ENSMUSG00000026656; ENSMUSG00000042029; ENSMUSG00000016529; ENSMUSG00000017631; ENSMUSG00000030577; ENSMUSG00000045322; ENSMUSG00000027843; ENSMUSG00000004266; ENSMUSG00000023367; ENSMUSG00000034652; ENSMUSG00000063632; ENSMUSG00000026395; ENSMUSG00000046718; ENSMUSG00000030365; ENSMUSG00000031885; ENSMUSG00000019987; ENSMUSG00000042228;…	470	469
3.6226e-26	1.9591e-24	GO:0051128	b	4	regulation of cellular component organization	21898; 229841; 105855; 98878; 66468; 66573; 66713; 66824; 67052; 56792; 67141; 67177; 67263; 56807; 239027; 16765; 104156; 68169; 100952; 68567; 68612; 68743; 68792; 68891; 66102; 69550; 69716; 50874; 233781; 332397; 70385; 215114; 70450; 70472; 70839; 11820; 234779; 11891; 104943; 71409; 104252; 11951; 268396; 71839; 192198; 399558; 11983; 277360; 268697; 72119; 268857; 170643; 72729; 12125; 727…	ENSMUSG00000040084; ENSMUSG00000059498; ENSMUSG00000003873; ENSMUSG00000029516; ENSMUSG00000026532; ENSMUSG00000053192; ENSMUSG00000058624; ENSMUSG00000027381; ENSMUSG00000030447; ENSMUSG00000016529; ENSMUSG00000030562; ENSMUSG00000037405; ENSMUSG00000026249; ENSMUSG00000044086; ENSMUSG00000050315; ENSMUSG00000068227; ENSMUSG00000017146; ENSMUSG00000017144; ENSMUSG00000023885; ENSMUSG00000019773;…	2558	2558
7.17251e-26	3.72971e-24	GO:0009966	b	4	regulation of signal transduction	229541; 98496; 21898; 54722; 230098; 218581; 13051; 230514; 66824; 56792; 67397; 100340; 16765; 330177; 68119; 100952; 232174; 232201; 68588; 226101; 68891; 66102; 68939; 69178; 233046; 235505; 69585; 102545; 215114; 332579; 234311; 100504518; 110075; 70839; 11820; 66443; 71085; 104943; 71481; 104252; 104418; 71660; 279572; 71805; 71839; 11983; 71912; 11987; 277360; 268857; 12044; 12047; 72318; 2…	ENSMUSG00000033721; ENSMUSG00000003873; ENSMUSG00000028028; ENSMUSG00000053192; ENSMUSG00000030117; ENSMUSG00000042190; ENSMUSG00000027381; ENSMUSG00000030447; ENSMUSG00000016529; ENSMUSG00000030562; ENSMUSG00000030560; ENSMUSG00000037405; ENSMUSG00000045322; ENSMUSG00000027843; ENSMUSG00000030844; ENSMUSG00000017146; ENSMUSG00000040479; ENSMUSG00000089929; ENSMUSG00000048779; ENSMUSG00000074361;…	2990	2988
1.12928e-24	5.65477e-23	GO:0046651	b	4	lymphocyte proliferation	21898; 105855; 66824; 230979; 16411; 208154; 102657; 50723; 171285; 94176; 237877; 74048; 74131; 11486; 11629; 11846; 12028; 12043; 12182; 12229; 12483; 12484; 12487; 12504; 12505; 12511; 12519; 12524; 12721; 12767; 12772; 14130; 14226; 14255; 14360; 237256; 14961; 14991; 15040; 15170; 15452; 16000; 16019; 16153; 16173; 16176; 16193; 16196; 16197; 16331; 81897; 16408; 16409; 16414; 16846; 16854; …	ENSMUSG00000033721; ENSMUSG00000003873; ENSMUSG00000031264; ENSMUSG00000031103; ENSMUSG00000026656; ENSMUSG00000031101; ENSMUSG00000027544; ENSMUSG00000016529; ENSMUSG00000010142; ENSMUSG00000030577; ENSMUSG00000018168; ENSMUSG00000021948; ENSMUSG00000045322; ENSMUSG00000027843; ENSMUSG00000004266; ENSMUSG00000076617; ENSMUSG00000034652; ENSMUSG00000019843; ENSMUSG00000063632; ENSMUSG00000052142;…	315	314
1.36826e-24	6.60675e-23	GO:0002685	b	4	regulation of leukocyte migration	105855; 66824; 230979; 56792; 100952; 70839; 11820; 71660; 14456; 74748; 11486; 11501; 11629; 109934; 11815; 12182; 12267; 12273; 12317; 12768; 12772; 12977; 24088; 14068; 14205; 14289; 14747; 15894; 15945; 16176; 16177; 16401; 16416; 16803; 16854; 16952; 17096; 17387; 17698; 17700; 18600; 18654; 18787; 19141; 19204; 19229; 19260; 19271; 19354; 20293; 20296; 20302; 20303; 20306; 20343; 217303; 20…	ENSMUSG00000031380; ENSMUSG00000033220; ENSMUSG00000039145; ENSMUSG00000000957; ENSMUSG00000030793; ENSMUSG00000024397; ENSMUSG00000042333; ENSMUSG00000042190; ENSMUSG00000022667; ENSMUSG00000022892; ENSMUSG00000005824; ENSMUSG00000031443; ENSMUSG00000056529; ENSMUSG00000017631; ENSMUSG00000026100; ENSMUSG00000037405; ENSMUSG00000022221; ENSMUSG00000050335; ENSMUSG00000027843; ENSMUSG00000031015;…	200	199
2.14467e-24	9.99859e-23	GO:0010646	b	4	regulation of cell communication	229541; 98496; 225872; 21898; 54722; 230098; 218581; 13051; 230514; 66824; 56792; 67397; 100340; 16765; 330177; 68119; 100952; 232174; 232201; 68588; 226101; 68891; 66102; 68939; 69178; 233046; 235505; 69585; 102545; 215114; 332579; 234311; 100504518; 110075; 70839; 11820; 66443; 71085; 104943; 71481; 104252; 104418; 71660; 279572; 71805; 71839; 192198; 11983; 71912; 11987; 277360; 268857; 12044;…	ENSMUSG00000033721; ENSMUSG00000003873; ENSMUSG00000028028; ENSMUSG00000053192; ENSMUSG00000027639; ENSMUSG00000030117; ENSMUSG00000042190; ENSMUSG00000027381; ENSMUSG00000030447; ENSMUSG00000016529; ENSMUSG00000030562; ENSMUSG00000030560; ENSMUSG00000037405; ENSMUSG00000045322; ENSMUSG00000027843; ENSMUSG00000030844; ENSMUSG00000017146; ENSMUSG00000040479; ENSMUSG00000089929; ENSMUSG00000048779;…	3377	3375
2.43812e-23	1.09878e-21	GO:0007159	b	4	leukocyte cell-cell adhesion	105855; 13051; 66824; 230979; 68891; 208154; 69769; 102657; 50723; 171285; 74048; 74131; 12394; 108101; 240754; 11486; 11501; 11629; 11846; 78473; 12399; 12400; 12484; 12487; 12504; 12505; 12511; 12519; 12522; 12524; 12721; 12772; 237256; 243910; 14537; 14961; 14991; 14998; 15040; 15117; 15170; 15894; 16000; 16173; 16176; 16186; 16190; 16193; 16196; 16197; 16401; 16402; 16408; 16409; 16414; 16421…	ENSMUSG00000051998; ENSMUSG00000031101; ENSMUSG00000001281; ENSMUSG00000037405; ENSMUSG00000027843; ENSMUSG00000004266; ENSMUSG00000022367; ENSMUSG00000034652; ENSMUSG00000052142; ENSMUSG00000026395; ENSMUSG00000038843; ENSMUSG00000020272; ENSMUSG00000031885; ENSMUSG00000027398; ENSMUSG00000019987; ENSMUSG00000024965; ENSMUSG00000022488; ENSMUSG00000037649; ENSMUSG00000056071; ENSMUSG00000026012;…	315	315
6.48534e-23	2.82845e-21	GO:0048523	b	4	negative regulation of cellular process	98496; 21898; 65963; 65972; 229841; 105855; 623121; 66107; 66141; 54722; 66222; 13051; 230514; 66824; 66889; 67052; 101488212; 230979; 56792; 67141; 67177; 67397; 100340; 56807; 67628; 67742; 16765; 76843; 68014; 330177; 68169; 100952; 232174; 232201; 68460; 68567; 68588; 77011; 68939; 69178; 233060; 208154; 235505; 69550; 109901; 69585; 69716; 50874; 69769; 69810; 69885; 102657; 233781; 233826; …	ENSMUSG00000040084; ENSMUSG00000046591; ENSMUSG00000003873; ENSMUSG00000029516; ENSMUSG00000026532; ENSMUSG00000030117; ENSMUSG00000016529; ENSMUSG00000031465; ENSMUSG00000045322; ENSMUSG00000030562; ENSMUSG00000037405; ENSMUSG00000022831; ENSMUSG00000005054; ENSMUSG00000026796; ENSMUSG00000030844; ENSMUSG00000023367; ENSMUSG00000068227; ENSMUSG00000031907; ENSMUSG00000017146; ENSMUSG00000040479;…	4808	4803
1.07888e-22	4.55826e-21	GO:0097530	b	4	granulocyte migration	105855; 68891; 71660; 277360; 270152; 74748; 75458; 11501; 12182; 12267; 12273; 12771; 12977; 12986; 14127; 14131; 14747; 14825; 15945; 16172; 16176; 16177; 16181; 16409; 16414; 68279; 16803; 16854; 16952; 17700; 19261; 19271; 19354; 20307; 20201; 20202; 20293; 20296; 20302; 20303; 20305; 20306; 20308; 20310; 20311; 20343; 217303; 20750; 20963; 21825; 21828; 22324; 22388; 56744; 57257; 319430; 58…	ENSMUSG00000033721; ENSMUSG00000059498; ENSMUSG00000033220; ENSMUSG00000018927; ENSMUSG00000039145; ENSMUSG00000053318; ENSMUSG00000021457; ENSMUSG00000029304; ENSMUSG00000042190; ENSMUSG00000019122; ENSMUSG00000058715; ENSMUSG00000026100; ENSMUSG00000056054; ENSMUSG00000050335; ENSMUSG00000034652; ENSMUSG00000055994; ENSMUSG00000016024; ENSMUSG00000011008; ENSMUSG00000035385; ENSMUSG00000054400;…	152	151
1.81255e-22	7.42598e-21	GO:0040017	b	4	positive regulation of locomotion	105855; 230098; 66824; 230979; 67141; 84112; 68792; 66102; 70839; 11820; 104943; 71660; 277360; 269016; 50490; 14456; 73710; 74048; 74117; 107895; 108101; 76709; 233571; 240641; 11501; 11541; 11602; 11629; 11745; 11853; 11854; 12043; 12267; 12273; 12317; 12631; 12721; 12767; 12768; 12772; 12822; 12977; 12978; 13036; 13132; 24088; 14068; 14164; 14172; 14178; 14191; 14205; 14289; 14538; 14678; 1472…	ENSMUSG00000040249; ENSMUSG00000027460; ENSMUSG00000028480; ENSMUSG00000039145; ENSMUSG00000025856; ENSMUSG00000042190; ENSMUSG00000057719; ENSMUSG00000030562; ENSMUSG00000018500; ENSMUSG00000037405; ENSMUSG00000022367; ENSMUSG00000050315; ENSMUSG00000057967; ENSMUSG00000028583; ENSMUSG00000021822; ENSMUSG00000002233; ENSMUSG00000019773; ENSMUSG00000026395; ENSMUSG00000048779; ENSMUSG00000045136;…	591	590
2.74384e-22	1.09108e-20	GO:0045785	b	4	positive regulation of cell adhesion	105855; 66824; 67896; 68169; 100952; 102657; 70450; 70839; 50723; 277360; 171285; 74048; 74131; 12394; 107581; 12550; 76709; 11486; 11492; 11501; 11629; 11687; 11854; 78473; 12317; 12399; 12400; 12484; 12487; 12504; 12505; 12511; 12512; 12519; 12522; 12524; 12631; 12721; 12772; 12774; 12837; 12977; 13132; 14115; 14260; 243910; 14538; 14726; 14991; 14998; 15040; 15117; 15170; 29875; 15894; 16000; …	ENSMUSG00000033721; ENSMUSG00000026532; ENSMUSG00000031101; ENSMUSG00000025351; ENSMUSG00000037405; ENSMUSG00000027843; ENSMUSG00000004266; ENSMUSG00000022367; ENSMUSG00000028583; ENSMUSG00000026778; ENSMUSG00000052142; ENSMUSG00000026395; ENSMUSG00000044042; ENSMUSG00000031885; ENSMUSG00000027398; ENSMUSG00000022488; ENSMUSG00000037649; ENSMUSG00000040152; ENSMUSG00000014599; ENSMUSG00000026012;…	404	404
4.48924e-22	1.73413e-20	GO:0002237	b	4	response to molecule of bacterial origin	21898; 66107; 13051; 66824; 56792; 66102; 332579; 234779; 268857; 394436; 171285; 100689; 83433; 11535; 109934; 11846; 12010; 12273; 12362; 110759; 12475; 12484; 12511; 12519; 12523; 12524; 12774; 12799; 12802; 24088; 14103; 14130; 14281; 14469; 14528; 18828; 14825; 14991; 15900; 15945; 16153; 16154; 16173; 16176; 16181; 16193; 81897; 16365; 16410; 16476; 16478; 16803; 16819; 414084; 246256; 1707…	ENSMUSG00000026712; ENSMUSG00000045322; ENSMUSG00000026656; ENSMUSG00000016529; ENSMUSG00000017631; ENSMUSG00000027843; ENSMUSG00000059089; ENSMUSG00000028036; ENSMUSG00000058427; ENSMUSG00000056130; ENSMUSG00000027398; ENSMUSG00000019987; ENSMUSG00000042228; ENSMUSG00000000982; ENSMUSG00000037411; ENSMUSG00000034330; ENSMUSG00000076604; ENSMUSG00000043017; ENSMUSG00000019850; ENSMUSG00000071076;…	382	366
9.08854e-22	3.41325e-20	GO:0098542	b	4	defense response to other organism	21898; 66141; 112419; 66824; 230979; 231655; 16411; 69146; 240913; 67775; 69550; 17951; 332579; 70450; 234311; 246730; 667370; 71660; 72042; 268973; 170743; 170744; 72536; 629871; 171285; 434219; 434341; 237886; 74481; 238447; 100689; 74748; 214763; 50931; 629845; 404711; 11745; 11810; 11846; 667373; 12043; 12273; 110785; 12493; 12504; 12524; 23962; 209387; 231507; 13057; 24088; 14127; 14129; 141…	ENSMUSG00000058385; ENSMUSG00000023341; ENSMUSG00000067377; ENSMUSG00000045322; ENSMUSG00000027639; ENSMUSG00000032661; ENSMUSG00000029322; ENSMUSG00000076695; ENSMUSG00000016529; ENSMUSG00000062727; ENSMUSG00000009585; ENSMUSG00000021948; ENSMUSG00000027843; ENSMUSG00000078616; ENSMUSG00000042286; ENSMUSG00000039699; ENSMUSG00000076617; ENSMUSG00000076612; ENSMUSG00000076613; ENSMUSG00000026395;…	706	677
9.37052e-22	3.42404e-20	GO:0007015	b	4	actin filament organization	16419; 105855; 66713; 66824; 16765; 11308; 231830; 232201; 233199; 50874; 215114; 104252; 268396; 277360; 170643; 72754; 171580; 50490; 74117; 74194; 74734; 76709; 109624; 109711; 11629; 11687; 11853; 11854; 11856; 11867; 12043; 12331; 12332; 12363; 12631; 12704; 12721; 24088; 13860; 14026; 14086; 14219; 14260; 14457; 14744; 14784; 15163; 15894; 56193; 16423; 16800; 17118; 17868; 17886; 17926; 17…	ENSMUSG00000022831; ENSMUSG00000029516; ENSMUSG00000021262; ENSMUSG00000030447; ENSMUSG00000019997; ENSMUSG00000030562; ENSMUSG00000031461; ENSMUSG00000037405; ENSMUSG00000021948; ENSMUSG00000031355; ENSMUSG00000039959; ENSMUSG00000050315; ENSMUSG00000017144; ENSMUSG00000002233; ENSMUSG00000029683; ENSMUSG00000027940; ENSMUSG00000079243; ENSMUSG00000044042; ENSMUSG00000030365; ENSMUSG00000033066;…	404	404
1.74757e-21	6.21766e-20	GO:0002697	b	4	regulation of immune effector process	21898; 54725; 66824; 230979; 68891; 69550; 70450; 234311; 171285; 77777; 237877; 74048; 74131; 100689; 74748; 214763; 50931; 11541; 109934; 11846; 12010; 12229; 110557; 12483; 12484; 12487; 12493; 12523; 12772; 24088; 14125; 14127; 14129; 14130; 14131; 14159; 14191; 243910; 14825; 14964; 14991; 15015; 15018; 15024; 15040; 15170; 80782; 15368; 16016; 16019; 16153; 16165; 16173; 16174; 16176; 16177…	ENSMUSG00000059498; ENSMUSG00000067377; ENSMUSG00000031264; ENSMUSG00000026656; ENSMUSG00000031101; ENSMUSG00000016529; ENSMUSG00000009585; ENSMUSG00000017631; ENSMUSG00000019987; ENSMUSG00000018500; ENSMUSG00000045322; ENSMUSG00000027843; ENSMUSG00000004266; ENSMUSG00000005339; ENSMUSG00000076617; ENSMUSG00000034652; ENSMUSG00000076613; ENSMUSG00000026395; ENSMUSG00000053318; ENSMUSG00000027398;…	408	407
6.73312e-21	2.33415e-19	GO:0050663	b	4	cytokine secretion	21898; 54725; 66824; 230979; 56807; 16822; 232414; 69146; 102657; 268973; 170744; 171285; 14456; 55991; 23845; 12481; 140497; 11746; 12362; 12363; 12475; 12523; 12774; 12978; 24088; 14191; 14255; 637515; 15559; 54445; 16153; 16172; 16176; 16180; 16190; 16193; 81799; 81897; 16410; 16420; 68279; 16846; 16952; 16971; 17082; 17096; 17381; 17394; 18106; 18439; 19260; 19664; 20302; 20963; 21897; 21926;…	ENSMUSG00000021457; ENSMUSG00000040249; ENSMUSG00000049723; ENSMUSG00000051314; ENSMUSG00000033467; ENSMUSG00000045322; ENSMUSG00000058914; ENSMUSG00000042817; ENSMUSG00000035914; ENSMUSG00000059201; ENSMUSG00000069830; ENSMUSG00000030793; ENSMUSG00000028874; ENSMUSG00000042333; ENSMUSG00000005800; ENSMUSG00000016529; ENSMUSG00000002699; ENSMUSG00000032691; ENSMUSG00000023349; ENSMUSG00000042265;…	225	225
1.65426e-20	5.5914e-19	GO:0043085	b	4	positive regulation of catalytic activity	21898; 229841; 105855; 66107; 66197; 218581; 66824; 56792; 67397; 67628; 239027; 11308; 231821; 330177; 16822; 68318; 232201; 69263; 69780; 215114; 70415; 70719; 11820; 71085; 71310; 104252; 104418; 268396; 277360; 268697; 72107; 72119; 72151; 268973; 72536; 215653; 12125; 72754; 269582; 94176; 50490; 14456; 237542; 12289; 74048; 192662; 50778; 75974; 76044; 240690; 76884; 214901; 404710; 11501; …	ENSMUSG00000033721; ENSMUSG00000089809; ENSMUSG00000027460; ENSMUSG00000038508; ENSMUSG00000003873; ENSMUSG00000045322; ENSMUSG00000048865; ENSMUSG00000027469; ENSMUSG00000045328; ENSMUSG00000002297; ENSMUSG00000025856; ENSMUSG00000027381; ENSMUSG00000019997; ENSMUSG00000036438; ENSMUSG00000029616; ENSMUSG00000018500; ENSMUSG00000037405; ENSMUSG00000021948; ENSMUSG00000031355; ENSMUSG00000028613;…	1318	1318
2.40691e-20	7.93693e-19	GO:0042127	b	4	regulation of cell proliferation	98496; 21898; 65972; 105855; 66141; 54722; 13051; 54598; 66824; 230979; 67141; 67628; 231633; 104156; 68588; 208154; 66190; 235505; 109901; 69745; 102657; 11820; 50723; 11983; 268697; 268857; 170799; 171285; 270152; 50490; 14456; 237877; 74048; 237911; 74131; 12393; 12394; 74777; 12550; 233571; 56429; 12798; 240641; 240690; 11486; 67451; 404710; 11535; 11541; 11629; 11799; 11810; 11815; 11846; 12…	ENSMUSG00000033721; ENSMUSG00000038151; ENSMUSG00000003873; ENSMUSG00000031264; ENSMUSG00000028063; ENSMUSG00000022150; ENSMUSG00000031101; ENSMUSG00000027544; ENSMUSG00000025856; ENSMUSG00000042379; ENSMUSG00000029322; ENSMUSG00000035273; ENSMUSG00000017499; ENSMUSG00000004665; ENSMUSG00000047945; ENSMUSG00000019997; ENSMUSG00000045322; ENSMUSG00000030562; ENSMUSG00000019987; ENSMUSG00000018500;…	1725	1724
2.4861e-20	8.00287e-19	GO:0048585	b	4	negative regulation of response to stimulus	98496; 21898; 13051; 230514; 54598; 66824; 56792; 67141; 100340; 67742; 16765; 330177; 100952; 232174; 232201; 68588; 68939; 69178; 235505; 69550; 69585; 69769; 69885; 102657; 233781; 102871; 66443; 104418; 71805; 268857; 12044; 12047; 269016; 170799; 215653; 12140; 171285; 14456; 434341; 237877; 74041; 74048; 74186; 12393; 74734; 74748; 50778; 12550; 75317; 231125; 214763; 50931; 666048; 109042;…	ENSMUSG00000099974; ENSMUSG00000040249; ENSMUSG00000032939; ENSMUSG00000067377; ENSMUSG00000003873; ENSMUSG00000045322; ENSMUSG00000026656; ENSMUSG00000055994; ENSMUSG00000051998; ENSMUSG00000025856; ENSMUSG00000032011; ENSMUSG00000030117; ENSMUSG00000027082; ENSMUSG00000057719; ENSMUSG00000029204; ENSMUSG00000036438; ENSMUSG00000017631; ENSMUSG00000030577; ENSMUSG00000037405; ENSMUSG00000021948;…	1566	1563
2.65543e-20	8.34915e-19	GO:0032640	b	4	tumor necrosis factor production	21898; 13051; 66824; 332579; 11820; 268857; 171285; 14456; 74048; 74131; 100689; 12481; 12475; 12484; 12523; 12759; 12772; 12774; 13057; 13058; 24088; 14127; 14131; 14255; 15040; 15170; 16153; 16173; 81897; 16423; 16800; 16803; 16846; 17087; 17394; 19204; 19260; 19261; 19264; 19271; 20128; 20296; 20302; 20303; 217305; 20737; 21825; 21897; 21929; 216869; 56744; 319430; 21899; 19419; 26362; 26888; …	ENSMUSG00000050350; ENSMUSG00000059498; ENSMUSG00000045322; ENSMUSG00000042817; ENSMUSG00000026928; ENSMUSG00000031101; ENSMUSG00000016529; ENSMUSG00000030793; ENSMUSG00000055447; ENSMUSG00000005800; ENSMUSG00000060216; ENSMUSG00000022892; ENSMUSG00000026395; ENSMUSG00000058715; ENSMUSG00000056529; ENSMUSG00000018930; ENSMUSG00000049871; ENSMUSG00000006519; ENSMUSG00000051457; ENSMUSG00000025779;…	156	156
3.30269e-20	1.01483e-18	GO:0098657	b	4	import into cell	105855; 98878; 66141; 54598; 66824; 56792; 56807; 11801; 232201; 232414; 331004; 68891; 66102; 232975; 69178; 215114; 70450; 11820; 234779; 110895; 497097; 11891; 71602; 11987; 104759; 72729; 629871; 236727; 237253; 94176; 270160; 14456; 106572; 74015; 94352; 238447; 100689; 140580; 140780; 233571; 83433; 629845; 12798; 11461; 11465; 404711; 11535; 668218; 11629; 109934; 11687; 11745; 11928; 1201…	ENSMUSG00000040249; ENSMUSG00000059498; ENSMUSG00000026712; ENSMUSG00000062609; ENSMUSG00000026656; ENSMUSG00000039145; ENSMUSG00000076695; ENSMUSG00000004665; ENSMUSG00000036438; ENSMUSG00000017631; ENSMUSG00000015854; ENSMUSG00000021948; ENSMUSG00000024371; ENSMUSG00000026317; ENSMUSG00000028613; ENSMUSG00000040907; ENSMUSG00000039959; ENSMUSG00000032220; ENSMUSG00000042286; ENSMUSG00000068227;…	920	906
4.09337e-20	1.22983e-18	GO:0071621	b	4	granulocyte chemotaxis	105855; 71660; 277360; 270152; 75458; 12182; 12267; 12273; 12771; 12977; 12986; 14127; 14131; 14747; 14825; 15945; 16172; 16176; 16181; 16409; 16414; 16803; 16854; 16952; 17700; 19271; 19354; 20307; 20201; 20202; 20293; 20296; 20302; 20303; 20305; 20306; 20308; 20310; 20311; 20343; 20750; 20963; 21825; 21828; 22324; 56744; 57257; 319430; 58217; 57349; 257632; 227541; 63873	ENSMUSG00000033721; ENSMUSG00000059498; ENSMUSG00000033220; ENSMUSG00000018927; ENSMUSG00000039145; ENSMUSG00000021457; ENSMUSG00000029304; ENSMUSG00000042190; ENSMUSG00000019122; ENSMUSG00000058715; ENSMUSG00000026100; ENSMUSG00000056054; ENSMUSG00000050335; ENSMUSG00000042265; ENSMUSG00000055994; ENSMUSG00000016024; ENSMUSG00000035385; ENSMUSG00000054400; ENSMUSG00000035352; ENSMUSG00000014158;…	130	130
1.17978e-19	3.46752e-18	GO:0023056	b	4	positive regulation of signaling	21898; 54722; 218581; 13051; 66824; 56792; 67397; 330177; 68119; 233046; 215114; 332579; 234311; 100504518; 110075; 70839; 11820; 104943; 71481; 71805; 11983; 269016; 170743; 170799; 215653; 12125; 171285; 94176; 50490; 14456; 237542; 12289; 434341; 74048; 12394; 238377; 107895; 214763; 233571; 83433; 109042; 76757; 240690; 76884; 11486; 404710; 11501; 11541; 11687; 114715; 11783; 12028; 12122; 1…	ENSMUSG00000040249; ENSMUSG00000032939; ENSMUSG00000001020; ENSMUSG00000038508; ENSMUSG00000003873; ENSMUSG00000028028; ENSMUSG00000029821; ENSMUSG00000053192; ENSMUSG00000032584; ENSMUSG00000025856; ENSMUSG00000030117; ENSMUSG00000035273; ENSMUSG00000027381; ENSMUSG00000042349; ENSMUSG00000030447; ENSMUSG00000057719; ENSMUSG00000019997; ENSMUSG00000036438; ENSMUSG00000029616; ENSMUSG00000016529;…	1758	1758
2.36441e-19	6.80145e-18	GO:1901701	b	4	cellular response to oxygen-containing compound	98496; 225872; 21898; 13051; 230514; 66713; 54598; 66824; 56792; 67972; 232174; 66102; 232975; 70415; 70839; 11820; 71660; 11951; 71805; 268697; 433294; 394436; 171285; 236900; 433766; 50490; 14456; 237542; 12289; 106572; 74041; 237911; 238377; 94353; 100689; 107581; 12550; 76709; 233571; 83433; 231207; 11461; 11513; 12843; 11629; 11747; 11799; 11810; 11821; 11829; 11846; 12189; 12229; 12290; 123…	ENSMUSG00000035232; ENSMUSG00000032939; ENSMUSG00000026712; ENSMUSG00000031264; ENSMUSG00000040249; ENSMUSG00000026656; ENSMUSG00000030447; ENSMUSG00000016529; ENSMUSG00000038508; ENSMUSG00000030562; ENSMUSG00000037405; ENSMUSG00000021948; ENSMUSG00000045322; ENSMUSG00000027843; ENSMUSG00000040907; ENSMUSG00000030844; ENSMUSG00000002111; ENSMUSG00000029661; ENSMUSG00000047343; ENSMUSG00000053113;…	1139	1123
5.20193e-19	1.45819e-17	GO:1903706	b	4	regulation of hemopoiesis	65963; 105855; 101488212; 232174; 234396; 70809; 170741; 215653; 630146; 12262; 14456; 74048; 74131; 12394; 74511; 238377; 74748; 76044; 72828; 11486; 11501; 12010; 12142; 12370; 12399; 12400; 12484; 12487; 12504; 12505; 12522; 12768; 12772; 12977; 12978; 12986; 13024; 14087; 14159; 14255; 14281; 243910; 14825; 14991; 14998; 15163; 15170; 16173; 16176; 16186; 16190; 16193; 16196; 16197; 16323; 16…	ENSMUSG00000038151; ENSMUSG00000022831; ENSMUSG00000046295; ENSMUSG00000031101; ENSMUSG00000042029; ENSMUSG00000018168; ENSMUSG00000039883; ENSMUSG00000045322; ENSMUSG00000004266; ENSMUSG00000023367; ENSMUSG00000026395; ENSMUSG00000030579; ENSMUSG00000030365; ENSMUSG00000031885; ENSMUSG00000027398; ENSMUSG00000042228; ENSMUSG00000000982; ENSMUSG00000022488; ENSMUSG00000037649; ENSMUSG00000060802;…	413	412
5.28488e-19	1.45819e-17	GO:0071219	b	4	cellular response to molecule of bacterial origin	21898; 13051; 66824; 56792; 66102; 171285; 100689; 83433; 11846; 12362; 12475; 12511; 12519; 12523; 12524; 12774; 24088; 14130; 14469; 14528; 18828; 14825; 15900; 15945; 16153; 16173; 16176; 16181; 16193; 81897; 16365; 16803; 16819; 414084; 246256; 17079; 17084; 17087; 17096; 17533; 18787; 19204; 19260; 19261; 19368; 19369; 19370; 20293; 20296; 20302; 20310; 20311; 217304; 21803; 21897; 21926; 21…	ENSMUSG00000026712; ENSMUSG00000037580; ENSMUSG00000045322; ENSMUSG00000026656; ENSMUSG00000037379; ENSMUSG00000056130; ENSMUSG00000030793; ENSMUSG00000016529; ENSMUSG00000017652; ENSMUSG00000055994; ENSMUSG00000056529; ENSMUSG00000022500; ENSMUSG00000025779; ENSMUSG00000026822; ENSMUSG00000027843; ENSMUSG00000037902; ENSMUSG00000002602; ENSMUSG00000029371; ENSMUSG00000019850; ENSMUSG00000032372;…	246	230
1.21257e-18	3.27878e-17	GO:0002366	b	4	leukocyte activation involved in immune response	21898; 66824; 84112; 68891; 70450; 234779; 11891; 50723; 171285; 94176; 237877; 74732; 75974; 50931; 11486; 11541; 109934; 11745; 12229; 12487; 12523; 12721; 12772; 13813; 14125; 14127; 14159; 14191; 243910; 14991; 15368; 15894; 16165; 16173; 16190; 16193; 16408; 16409; 16414; 210293; 16803; 16848; 16854; 16950; 16952; 17079; 17085; 17096; 17474; 17916; 18106; 18173; 18826; 19204; 19229; 19264; 1…	ENSMUSG00000021457; ENSMUSG00000024300; ENSMUSG00000026786; ENSMUSG00000034266; ENSMUSG00000031264; ENSMUSG00000017652; ENSMUSG00000000732; ENSMUSG00000030793; ENSMUSG00000028874; ENSMUSG00000040751; ENSMUSG00000046006; ENSMUSG00000021998; ENSMUSG00000051212; ENSMUSG00000029570; ENSMUSG00000089669; ENSMUSG00000026395; ENSMUSG00000058715; ENSMUSG00000056529; ENSMUSG00000017631; ENSMUSG00000018500;…	271	271
1.67747e-18	4.44695e-17	GO:0022407	b	4	regulation of cell-cell adhesion	105855; 66824; 230979; 208154; 69769; 102657; 50723; 171285; 74048; 74131; 12394; 74762; 12550; 108101; 72828; 240754; 11486; 11492; 11501; 11629; 11687; 11846; 78473; 12399; 12400; 12484; 12487; 12504; 12505; 12511; 12519; 12522; 12524; 12527; 12721; 12772; 12774; 13845; 237256; 243910; 14538; 14726; 14961; 14991; 14998; 15040; 15117; 15170; 15894; 16000; 16153; 16173; 16176; 16181; 16186; 16190…	ENSMUSG00000051998; ENSMUSG00000031101; ENSMUSG00000031885; ENSMUSG00000016529; ENSMUSG00000037405; ENSMUSG00000021948; ENSMUSG00000026249; ENSMUSG00000027843; ENSMUSG00000004266; ENSMUSG00000022367; ENSMUSG00000028583; ENSMUSG00000034652; ENSMUSG00000052142; ENSMUSG00000026395; ENSMUSG00000001034; ENSMUSG00000005958; ENSMUSG00000027398; ENSMUSG00000019987; ENSMUSG00000042228; ENSMUSG00000024965;…	388	388
4.34183e-18	1.12888e-16	GO:0030098	b	4	lymphocyte differentiation	105855; 232174; 102545; 234396; 210757; 234779; 277360; 12047; 94176; 14456; 74048; 74131; 12393; 12394; 74734; 74748; 75974; 11486; 11501; 12010; 12028; 12043; 12142; 12229; 12399; 12400; 12484; 12487; 12504; 12505; 12522; 12772; 13024; 13813; 14087; 14127; 14255; 14347; 243910; 14991; 14998; 15170; 15242; 16019; 16071; 16173; 16176; 16186; 16190; 16193; 16196; 16197; 16331; 81897; 16428; 210293…	ENSMUSG00000099974; ENSMUSG00000038151; ENSMUSG00000003873; ENSMUSG00000031264; ENSMUSG00000046295; ENSMUSG00000031101; ENSMUSG00000032446; ENSMUSG00000000861; ENSMUSG00000029204; ENSMUSG00000018168; ENSMUSG00000045322; ENSMUSG00000027843; ENSMUSG00000004266; ENSMUSG00000004698; ENSMUSG00000076617; ENSMUSG00000026395; ENSMUSG00000031885; ENSMUSG00000027398; ENSMUSG00000022488; ENSMUSG00000037649;…	393	393
4.71158e-18	1.2019e-16	GO:0051241	b	4	negative regulation of multicellular organismal process	21898; 65963; 105855; 13051; 54598; 66824; 66889; 56792; 100952; 69550; 102657; 233781; 70809; 11820; 268857; 170741; 170744; 171285; 433766; 270120; 12262; 14456; 74048; 74117; 12394; 74511; 238377; 94352; 74748; 74762; 76044; 72828; 240672; 11486; 240888; 11513; 11535; 11541; 11601; 11602; 109934; 11668; 114715; 11746; 11747; 11815; 11829; 11846; 11857; 11928; 12010; 12043; 12229; 12306; 12316;…	ENSMUSG00000037370; ENSMUSG00000040249; ENSMUSG00000027460; ENSMUSG00000038508; ENSMUSG00000018965; ENSMUSG00000031264; ENSMUSG00000029516; ENSMUSG00000026656; ENSMUSG00000042029; ENSMUSG00000027544; ENSMUSG00000025856; ENSMUSG00000029322; ENSMUSG00000021262; ENSMUSG00000042190; ENSMUSG00000016529; ENSMUSG00000031465; ENSMUSG00000025351; ENSMUSG00000017631; ENSMUSG00000018500; ENSMUSG00000021948;…	1303	1301
5.23782e-18	1.31139e-16	GO:0032970	b	4	regulation of actin filament-based process	105855; 66713; 66824; 56792; 16765; 69550; 50874; 104252; 268396; 277360; 170643; 72754; 73112; 50490; 74117; 74194; 192662; 74734; 76709; 12798; 67451; 11687; 11853; 11854; 11856; 11857; 11867; 11928; 12182; 12332; 12373; 12631; 12704; 12721; 12978; 13009; 24088; 13506; 13605; 13860; 14026; 14086; 14159; 14168; 14191; 14219; 14260; 14726; 14744; 14784; 15162; 15163; 15894; 56193; 16416; 16423; 1…	ENSMUSG00000040249; ENSMUSG00000022831; ENSMUSG00000029516; ENSMUSG00000021262; ENSMUSG00000030447; ENSMUSG00000004665; ENSMUSG00000029204; ENSMUSG00000030562; ENSMUSG00000037405; ENSMUSG00000021948; ENSMUSG00000031355; ENSMUSG00000050315; ENSMUSG00000028583; ENSMUSG00000017144; ENSMUSG00000002233; ENSMUSG00000029683; ENSMUSG00000044042; ENSMUSG00000030470; ENSMUSG00000030365; ENSMUSG00000040964;…	394	394
6.21732e-18	1.52833e-16	GO:0019221	b	4	cytokine-mediated signaling pathway	66141; 13051; 66824; 56792; 60504; 14456; 434341; 74186; 50931; 83433; 240690; 11846; 12362; 12363; 12484; 12504; 12505; 12767; 12768; 12771; 12772; 12774; 12977; 12978; 12982; 12983; 12984; 12986; 13448; 14127; 14255; 14825; 15170; 15945; 15980; 16154; 16164; 16165; 16172; 16173; 16174; 16176; 16177; 16180; 16181; 16185; 16186; 16190; 16193; 16196; 16197; 16846; 17082; 246728; 246746; 17381; 504…	ENSMUSG00000059326; ENSMUSG00000004266; ENSMUSG00000068227; ENSMUSG00000060509; ENSMUSG00000026395; ENSMUSG00000058427; ENSMUSG00000027398; ENSMUSG00000019987; ENSMUSG00000031760; ENSMUSG00000009185; ENSMUSG00000000982; ENSMUSG00000068335; ENSMUSG00000014599; ENSMUSG00000028927; ENSMUSG00000023274; ENSMUSG00000002897; ENSMUSG00000000078; ENSMUSG00000033467; ENSMUSG00000026946; ENSMUSG00000032089;…	401	401
7.55946e-18	1.82507e-16	GO:0051049	b	4	regulation of transport	98496; 21898; 105855; 98878; 54725; 66395; 66824; 230979; 56792; 67397; 56807; 67628; 213469; 68460; 232414; 68891; 69146; 69178; 69550; 69810; 102657; 70357; 215114; 70450; 70839; 234779; 11891; 11983; 71912; 72054; 170744; 269224; 433294; 171285; 171580; 94176; 14456; 237542; 12289; 12292; 55991; 106572; 74096; 74117; 23845; 12394; 74513; 238377; 94353; 74772; 74777; 12481; 140497; 140780; 1255…	ENSMUSG00000040249; ENSMUSG00000059498; ENSMUSG00000003873; ENSMUSG00000022831; ENSMUSG00000048677; ENSMUSG00000022150; ENSMUSG00000039145; ENSMUSG00000020592; ENSMUSG00000030447; ENSMUSG00000004665; ENSMUSG00000018507; ENSMUSG00000036438; ENSMUSG00000029616; ENSMUSG00000030577; ENSMUSG00000018500; ENSMUSG00000050989; ENSMUSG00000037405; ENSMUSG00000021948; ENSMUSG00000003484; ENSMUSG00000045322;…	1952	1952
1.13197e-17	2.68496e-16	GO:0032496	b	4	response to lipopolysaccharide	21898; 66107; 13051; 66824; 56792; 66102; 234779; 268857; 394436; 171285; 100689; 83433; 11535; 109934; 11846; 12362; 110759; 12475; 12511; 12519; 12523; 12524; 12774; 12799; 12802; 14103; 14281; 14469; 14528; 18828; 14825; 15900; 15945; 16153; 16154; 16173; 16176; 16181; 16193; 81897; 16365; 16476; 16478; 16803; 16819; 414084; 246256; 17079; 17084; 17087; 17096; 17533; 17970; 18173; 18439; 18787…	ENSMUSG00000026712; ENSMUSG00000045322; ENSMUSG00000059089; ENSMUSG00000016529; ENSMUSG00000017631; ENSMUSG00000041515; ENSMUSG00000027843; ENSMUSG00000028036; ENSMUSG00000058427; ENSMUSG00000056130; ENSMUSG00000027398; ENSMUSG00000019987; ENSMUSG00000042228; ENSMUSG00000000982; ENSMUSG00000037411; ENSMUSG00000034330; ENSMUSG00000076604; ENSMUSG00000043017; ENSMUSG00000019850; ENSMUSG00000071076;…	366	350
1.54602e-16	3.60382e-15	GO:2000026	b	4	regulation of multicellular organismal development	65963; 105855; 13051; 66713; 101488212; 56792; 67141; 67263; 231633; 104156; 68169; 100952; 232174; 68588; 68792; 235505; 109901; 102657; 233781; 234396; 70809; 70839; 11820; 11951; 268396; 399558; 277360; 268697; 170741; 215653; 171285; 630146; 241568; 270120; 12262; 14456; 73710; 237877; 74048; 74117; 74131; 12393; 12394; 74511; 238377; 94352; 74748; 74762; 73420; 140570; 108000; 140780; 12550;…	ENSMUSG00000037370; ENSMUSG00000040249; ENSMUSG00000038151; ENSMUSG00000027460; ENSMUSG00000003873; ENSMUSG00000022831; ENSMUSG00000029516; ENSMUSG00000046295; ENSMUSG00000028480; ENSMUSG00000031101; ENSMUSG00000031885; ENSMUSG00000027544; ENSMUSG00000031486; ENSMUSG00000025856; ENSMUSG00000032011; ENSMUSG00000030117; ENSMUSG00000000861; ENSMUSG00000035273; ENSMUSG00000074785; ENSMUSG00000018654;…	2141	2139
3.00498e-16	6.886e-15	GO:0051094	b	4	positive regulation of developmental process	105855; 13051; 66713; 101488212; 67141; 67399; 231633; 104156; 68169; 232174; 68588; 68792; 109901; 102657; 70450; 70717; 70839; 11820; 71660; 11951; 268396; 399558; 277360; 268697; 630146; 14456; 73710; 237877; 74048; 74117; 74131; 74186; 12393; 12394; 238377; 94352; 140570; 76709; 214763; 83433; 240641; 11486; 404710; 11501; 11535; 11601; 11602; 11745; 12028; 12043; 12189; 12267; 12273; 12306; …	ENSMUSG00000040249; ENSMUSG00000027460; ENSMUSG00000038508; ENSMUSG00000003873; ENSMUSG00000022831; ENSMUSG00000028063; ENSMUSG00000028480; ENSMUSG00000031101; ENSMUSG00000005958; ENSMUSG00000027544; ENSMUSG00000025856; ENSMUSG00000030117; ENSMUSG00000000861; ENSMUSG00000042190; ENSMUSG00000074785; ENSMUSG00000030447; ENSMUSG00000016529; ENSMUSG00000031465; ENSMUSG00000041272; ENSMUSG00000026249;…	1518	1517
1.46001e-15	3.28989e-14	GO:0051050	b	4	positive regulation of transport	21898; 105855; 54725; 66824; 230979; 56792; 56807; 67628; 232414; 68891; 69146; 69178; 69810; 102657; 215114; 70450; 70839; 234779; 11891; 11983; 72054; 170744; 171285; 94176; 14456; 237542; 12289; 55991; 106572; 74117; 23845; 12394; 238377; 74772; 12481; 140497; 12550; 76709; 233571; 76757; 240641; 11541; 109934; 12010; 12028; 12189; 12263; 12306; 12314; 12317; 12322; 12362; 12363; 12475; 12504;…	ENSMUSG00000040249; ENSMUSG00000059498; ENSMUSG00000003873; ENSMUSG00000022831; ENSMUSG00000027863; ENSMUSG00000039145; ENSMUSG00000016529; ENSMUSG00000018507; ENSMUSG00000036438; ENSMUSG00000017631; ENSMUSG00000018500; ENSMUSG00000021948; ENSMUSG00000003484; ENSMUSG00000027843; ENSMUSG00000036943; ENSMUSG00000039959; ENSMUSG00000068227; ENSMUSG00000017146; ENSMUSG00000015968; ENSMUSG00000076617;…	1084	1084
1.51181e-15	3.35076e-14	GO:0002444	b	4	myeloid leukocyte mediated immunity	68891; 70450; 100689; 74732; 11541; 109934; 11745; 11846; 12229; 12523; 12772; 14125; 14127; 14129; 14131; 14159; 14191; 14825; 15040; 15368; 16016; 16165; 16190; 16409; 16414; 17096; 17916; 17969; 19204; 19354; 20302; 20311; 217303; 217304; 20963; 22388; 380732; 56743; 58217; 19419	ENSMUSG00000000982; ENSMUSG00000059498; ENSMUSG00000031264; ENSMUSG00000067212; ENSMUSG00000021457; ENSMUSG00000058715; ENSMUSG00000056529; ENSMUSG00000017631; ENSMUSG00000018500; ENSMUSG00000042265; ENSMUSG00000029484; ENSMUSG00000029371; ENSMUSG00000053158; ENSMUSG00000015947; ENSMUSG00000057948; ENSMUSG00000034652; ENSMUSG00000076613; ENSMUSG00000015950; ENSMUSG00000039232; ENSMUSG00000030786;…	98	98
2.3444e-15	5.11231e-14	GO:0046903	b	4	secretion	21898; 54725; 66824; 230979; 67397; 56807; 16822; 84112; 213469; 232414; 68891; 69146; 69178; 230099; 102657; 70450; 70839; 110895; 11891; 72054; 268973; 170744; 269224; 171285; 171580; 14456; 12289; 55991; 106572; 74190; 23845; 12394; 238377; 94353; 74732; 74772; 12481; 140497; 75458; 76408; 240754; 11486; 11535; 11541; 109934; 11745; 11746; 11747; 11799; 11821; 12229; 12290; 12306; 12314; 12322…	ENSMUSG00000040249; ENSMUSG00000051998; ENSMUSG00000059498; ENSMUSG00000031264; ENSMUSG00000030774; ENSMUSG00000022150; ENSMUSG00000020592; ENSMUSG00000020865; ENSMUSG00000019997; ENSMUSG00000036438; ENSMUSG00000029616; ENSMUSG00000018500; ENSMUSG00000003484; ENSMUSG00000045322; ENSMUSG00000027843; ENSMUSG00000036943; ENSMUSG00000026796; ENSMUSG00000070348; ENSMUSG00000031906; ENSMUSG00000015968;…	1225	1225
3.92461e-15	8.42235e-14	GO:0030099	b	4	myeloid cell differentiation	105855; 101488212; 56792; 11308; 235505; 234396; 70809; 11820; 11983; 170741; 215653; 630146; 12262; 23845; 12394; 74481; 74511; 238377; 76044; 83433; 72828; 109711; 11501; 11733; 12010; 12306; 12370; 12400; 12504; 12579; 12768; 12977; 12978; 12986; 13132; 13423; 24088; 14127; 14159; 14281; 15163; 15170; 15242; 15900; 16323; 16331; 16409; 16416; 16476; 319159; 319160; 16658; 226421; 16909; 17096;…	ENSMUSG00000022831; ENSMUSG00000046295; ENSMUSG00000042029; ENSMUSG00000025854; ENSMUSG00000004266; ENSMUSG00000039699; ENSMUSG00000030579; ENSMUSG00000030365; ENSMUSG00000031885; ENSMUSG00000042228; ENSMUSG00000000982; ENSMUSG00000022488; ENSMUSG00000022489; ENSMUSG00000060802; ENSMUSG00000014599; ENSMUSG00000032020; ENSMUSG00000023274; ENSMUSG00000073802; ENSMUSG00000046186; ENSMUSG00000070354;…	409	407
4.62012e-15	9.76001e-14	GO:0002449	b	4	lymphocyte mediated immunity	54725; 70450; 11891; 50723; 629871; 171285; 77777; 12262; 237877; 74048; 74131; 238447; 74732; 50931; 629845; 404711; 11846; 12010; 12229; 110557; 12259; 12260; 12263; 110785; 12484; 12487; 12721; 13032; 13036; 14125; 14127; 14129; 14130; 14131; 14961; 14964; 14991; 14998; 15015; 15018; 15024; 15040; 15170; 80782; 15452; 15894; 16016; 16019; 16071; 16165; 16173; 16174; 16176; 16177; 16190; 16193;…	ENSMUSG00000059498; ENSMUSG00000031264; ENSMUSG00000026656; ENSMUSG00000031101; ENSMUSG00000076695; ENSMUSG00000036887; ENSMUSG00000030560; ENSMUSG00000037405; ENSMUSG00000021948; ENSMUSG00000024371; ENSMUSG00000004266; ENSMUSG00000005339; ENSMUSG00000076617; ENSMUSG00000076612; ENSMUSG00000076613; ENSMUSG00000026395; ENSMUSG00000021403; ENSMUSG00000039748; ENSMUSG00000030165; ENSMUSG00000027398;…	422	408
6.02151e-15	1.25247e-13	GO:0140014	b	4	mitotic nuclear division	229841; 67052; 67141; 67177; 68612; 69716; 70099; 70218; 70385; 71819; 268697; 72107; 72119; 105988; 73420; 108907; 240641; 110033; 11799; 77744; 12235; 12428; 12442; 12443; 12448; 12449; 12487; 12649; 12704; 13860; 67849; 14211; 215387; 14841; 15511; 16000; 16176; 16551; 16571; 17345; 18005; 18817; 51944; 19385; 66977; 52276; 100502766; 381318; 20877; 20878; 73804; 54141; 21803; 21926; 22137; 22…	ENSMUSG00000062510; ENSMUSG00000040084; ENSMUSG00000028678; ENSMUSG00000018965; ENSMUSG00000001403; ENSMUSG00000069910; ENSMUSG00000027331; ENSMUSG00000024056; ENSMUSG00000027469; ENSMUSG00000045328; ENSMUSG00000017716; ENSMUSG00000029910; ENSMUSG00000024795; ENSMUSG00000034906; ENSMUSG00000024791; ENSMUSG00000022422; ENSMUSG00000023940; ENSMUSG00000005732; ENSMUSG00000030677; ENSMUSG00000006398;…	275	275
6.65131e-15	1.36251e-13	GO:0000165	b	4	MAPK cascade	21898; 54722; 66824; 67397; 330177; 100952; 70415; 332579; 110075; 11820; 279572; 269016; 215653; 171285; 50490; 14456; 233571; 83433; 109042; 240672; 240754; 404710; 11501; 11687; 114715; 12273; 12484; 12504; 12505; 12523; 12768; 12771; 12774; 12955; 12978; 13036; 13132; 13197; 100532; 13448; 13449; 24088; 76829; 14125; 14130; 14164; 14168; 14172; 14219; 14235; 14255; 14289; 14538; 14562; 14678;…	ENSMUSG00000040249; ENSMUSG00000051998; ENSMUSG00000038508; ENSMUSG00000045322; ENSMUSG00000029821; ENSMUSG00000025856; ENSMUSG00000030117; ENSMUSG00000057719; ENSMUSG00000019997; ENSMUSG00000030562; ENSMUSG00000037405; ENSMUSG00000021948; ENSMUSG00000027843; ENSMUSG00000004266; ENSMUSG00000057967; ENSMUSG00000018822; ENSMUSG00000026656; ENSMUSG00000076617; ENSMUSG00000034652; ENSMUSG00000026395;…	820	820
8.29267e-15	1.67339e-13	GO:0022603	b	4	regulation of anatomical structure morphogenesis	13051; 66713; 67263; 104156; 100952; 68588; 68792; 109901; 70450; 71409; 104252; 11951; 277360; 72729; 241568; 73710; 74117; 74194; 74202; 12393; 12394; 192662; 74734; 140570; 12550; 76709; 67220; 83433; 11486; 11535; 11601; 11602; 109934; 114715; 11745; 11853; 11854; 12028; 12043; 12189; 12267; 12273; 12317; 54712; 12505; 12508; 12631; 12704; 12721; 12767; 12771; 12772; 12774; 12832; 12977; 1297…	ENSMUSG00000040249; ENSMUSG00000021665; ENSMUSG00000027460; ENSMUSG00000038508; ENSMUSG00000003873; ENSMUSG00000029516; ENSMUSG00000026532; ENSMUSG00000015829; ENSMUSG00000027544; ENSMUSG00000025856; ENSMUSG00000000861; ENSMUSG00000074785; ENSMUSG00000030447; ENSMUSG00000016529; ENSMUSG00000029204; ENSMUSG00000017631; ENSMUSG00000018965; ENSMUSG00000037405; ENSMUSG00000028613; ENSMUSG00000022367;…	1065	1065
8.8932e-15	1.76818e-13	GO:0006915	b	4	apoptotic process	21898; 105855; 54722; 54725; 13051; 66824; 66940; 101488212; 67397; 67628; 11801; 68169; 69769; 233826; 17951; 215114; 70415; 332579; 110075; 11820; 66443; 497097; 71839; 71877; 11983; 72119; 12044; 12047; 268973; 269016; 170799; 215653; 12125; 80986; 433294; 171580; 50490; 14456; 237877; 74041; 66985; 23845; 140580; 12550; 109032; 240690; 76884; 11486; 11501; 11535; 11602; 11629; 11668; 11747; 1…	ENSMUSG00000099974; ENSMUSG00000040249; ENSMUSG00000040084; ENSMUSG00000027460; ENSMUSG00000074063; ENSMUSG00000003873; ENSMUSG00000031264; ENSMUSG00000029516; ENSMUSG00000022150; ENSMUSG00000027469; ENSMUSG00000055994; ENSMUSG00000029322; ENSMUSG00000027381; ENSMUSG00000042349; ENSMUSG00000057719; ENSMUSG00000019997; ENSMUSG00000029616; ENSMUSG00000030560; ENSMUSG00000015854; ENSMUSG00000097328;…	1916	1913
3.30518e-14	6.47623e-13	GO:0042107	b	4	cytokine metabolic process	21898; 13051; 66889; 102657; 332579; 11820; 50723; 170743; 170744; 170740; 12487; 12772; 13058; 24088; 14125; 14131; 16153; 16173; 16176; 16180; 16193; 16324; 16331; 81897; 16803; 16994; 18761; 19204; 19264; 19696; 20737; 20963; 21825; 21897; 21926; 96875; 21899; 58217; 93675; 225471; 108723; 54123; 64685	ENSMUSG00000024399; ENSMUSG00000040522; ENSMUSG00000045322; ENSMUSG00000026928; ENSMUSG00000000732; ENSMUSG00000016529; ENSMUSG00000056130; ENSMUSG00000021457; ENSMUSG00000026946; ENSMUSG00000059498; ENSMUSG00000022892; ENSMUSG00000056529; ENSMUSG00000042265; ENSMUSG00000031438; ENSMUSG00000026288; ENSMUSG00000035914; ENSMUSG00000005267; ENSMUSG00000016024; ENSMUSG00000026778; ENSMUSG00000049103;…	120	120
3.90571e-14	7.5436e-13	GO:0002460	b	4	adaptive immune response based on somatic recombination of immune receptors built from immunoglobulin superfamily domains	70450; 11891; 50723; 629871; 171285; 77777; 12262; 237877; 74048; 74131; 238447; 74732; 50931; 629845; 11486; 404711; 11846; 12010; 12229; 110557; 12259; 12260; 12263; 12267; 110785; 12484; 12487; 12504; 12772; 13032; 13036; 14125; 14127; 14129; 14130; 14131; 243910; 14961; 14964; 14991; 14998; 15015; 15018; 15024; 15040; 15170; 15452; 15894; 16016; 16019; 16071; 16165; 16173; 16174; 16176; 16177…	ENSMUSG00000059498; ENSMUSG00000031264; ENSMUSG00000026656; ENSMUSG00000031101; ENSMUSG00000076695; ENSMUSG00000036887; ENSMUSG00000030560; ENSMUSG00000037405; ENSMUSG00000021948; ENSMUSG00000024371; ENSMUSG00000004266; ENSMUSG00000005339; ENSMUSG00000076617; ENSMUSG00000076612; ENSMUSG00000076613; ENSMUSG00000026395; ENSMUSG00000021403; ENSMUSG00000039748; ENSMUSG00000039232; ENSMUSG00000027398;…	442	428
4.19801e-14	7.99396e-13	GO:0010941	b	4	regulation of cell death	21898; 105855; 54722; 13051; 66824; 101488212; 67397; 67628; 68169; 66190; 69769; 233826; 17951; 215114; 70415; 332579; 110075; 234779; 66443; 11951; 71805; 71839; 71877; 11983; 12044; 12047; 268973; 269016; 170799; 215653; 12125; 171580; 50490; 14456; 237877; 74041; 23845; 12550; 109032; 240690; 11486; 11501; 11535; 11602; 11629; 11668; 11747; 11783; 11799; 12021; 12028; 12043; 12045; 12122; 121…	ENSMUSG00000099974; ENSMUSG00000040249; ENSMUSG00000032939; ENSMUSG00000027460; ENSMUSG00000074063; ENSMUSG00000003873; ENSMUSG00000022831; ENSMUSG00000022150; ENSMUSG00000053192; ENSMUSG00000055994; ENSMUSG00000029322; ENSMUSG00000027381; ENSMUSG00000057719; ENSMUSG00000019997; ENSMUSG00000029616; ENSMUSG00000030560; ENSMUSG00000018965; ENSMUSG00000018168; ENSMUSG00000037405; ENSMUSG00000021948;…	1727	1725
5.28078e-14	9.91613e-13	GO:0034113	b	4	heterotypic cell-cell adhesion	16411; 235379; 12481; 67451; 11687; 78473; 12505; 13506; 14538; 16153; 16176; 16181; 16401; 16402; 16410; 16414; 16416; 16421; 16423; 50918; 19261; 19264; 381924; 21838; 21926; 21929; 57781; 23939	ENSMUSG00000055447; ENSMUSG00000022667; ENSMUSG00000021360; ENSMUSG00000016529; ENSMUSG00000001281; ENSMUSG00000046167; ENSMUSG00000000555; ENSMUSG00000027009; ENSMUSG00000068566; ENSMUSG00000027863; ENSMUSG00000032011; ENSMUSG00000024331; ENSMUSG00000018924; ENSMUSG00000070369; ENSMUSG00000024401; ENSMUSG00000027087; ENSMUSG00000026395; ENSMUSG00000001034; ENSMUSG00000005087; ENSMUSG00000057058;…	56	56
8.43319e-14	1.56187e-12	GO:0033993	b	4	response to lipid	98496; 225872; 21898; 66107; 13051; 66824; 56792; 67972; 104174; 232174; 66102; 232975; 230099; 234779; 268697; 268857; 433294; 394436; 171285; 236900; 433766; 12394; 100689; 233571; 83433; 76267; 11535; 11629; 109934; 11745; 11846; 11867; 11928; 12043; 12122; 12189; 12314; 12317; 12362; 12428; 12443; 110759; 12475; 12511; 12519; 12523; 12524; 12759; 12774; 12799; 12802; 12894; 12955; 13036; 1303…	ENSMUSG00000026712; ENSMUSG00000018965; ENSMUSG00000045322; ENSMUSG00000059089; ENSMUSG00000016529; ENSMUSG00000019997; ENSMUSG00000036438; ENSMUSG00000017631; ENSMUSG00000027843; ENSMUSG00000040907; ENSMUSG00000047343; ENSMUSG00000070348; ENSMUSG00000017146; ENSMUSG00000035232; ENSMUSG00000020592; ENSMUSG00000063142; ENSMUSG00000048779; ENSMUSG00000059201; ENSMUSG00000028036; ENSMUSG00000058427;…	987	970
8.74446e-14	1.59764e-12	GO:0000070	b	4	mitotic sister chromatid segregation	229841; 67052; 67141; 67177; 69716; 70099; 70218; 70385; 71819; 268697; 72107; 105988; 108907; 110033; 11799; 12235; 12704; 67849; 14211; 215387; 14841; 16571; 18005; 18817; 51944; 66977; 52276; 100502766; 381318; 20877; 73804; 54141; 22137; 66371; 56150; 23834; 56742; 21335; 107995; 12236; 381293; 26934; 59126; 72415; 83560; 54392; 228421; 16319	ENSMUSG00000040084; ENSMUSG00000028678; ENSMUSG00000010342; ENSMUSG00000038379; ENSMUSG00000069910; ENSMUSG00000024056; ENSMUSG00000002055; ENSMUSG00000045328; ENSMUSG00000017716; ENSMUSG00000034906; ENSMUSG00000024791; ENSMUSG00000022422; ENSMUSG00000023940; ENSMUSG00000030677; ENSMUSG00000006398; ENSMUSG00000041431; ENSMUSG00000034349; ENSMUSG00000034311; ENSMUSG00000030867; ENSMUSG00000050107;…	148	148
9.91918e-14	1.7881e-12	GO:0006796	b	4	phosphate-containing compound metabolic process	271697; 98496; 229665; 21898; 229841; 105855; 98878; 54722; 66197; 13051; 66569; 66824; 230979; 56792; 67397; 67420; 100340; 67742; 11308; 330177; 16822; 100952; 68792; 232889; 140781; 235505; 100503915; 70021; 241062; 70415; 332579; 110075; 70789; 11820; 234779; 70025; 246730; 71481; 104418; 71660; 235534; 11951; 279572; 11983; 268697; 72119; 170643; 269016; 170743; 170744; 105278; 269224; 21565…	ENSMUSG00000033721; ENSMUSG00000040084; ENSMUSG00000003873; ENSMUSG00000028028; ENSMUSG00000029516; ENSMUSG00000027639; ENSMUSG00000030117; ENSMUSG00000027460; ENSMUSG00000030562; ENSMUSG00000037405; ENSMUSG00000028937; ENSMUSG00000045322; ENSMUSG00000027843; ENSMUSG00000050315; ENSMUSG00000031906; ENSMUSG00000040479; ENSMUSG00000048779; ENSMUSG00000040026; ENSMUSG00000074361; ENSMUSG00000073375;…	3091	3089
1.07929e-13	1.92e-12	GO:0051336	b	4	regulation of hydrolase activity	105855; 66107; 66222; 218581; 66824; 67628; 239027; 231655; 231821; 232201; 235505; 69550; 69780; 17951; 215114; 70719; 11820; 241197; 71085; 71310; 246730; 104252; 11983; 277360; 12047; 268973; 269016; 72536; 12125; 72754; 171580; 94176; 14456; 74048; 192662; 74772; 140570; 107895; 50778; 12550; 75974; 76464; 76469; 231207; 240690; 76884; 404710; 109934; 114715; 11783; 11799; 11853; 11856; 11857…	ENSMUSG00000099974; ENSMUSG00000040249; ENSMUSG00000023015; ENSMUSG00000003873; ENSMUSG00000045322; ENSMUSG00000030536; ENSMUSG00000027381; ENSMUSG00000026475; ENSMUSG00000057719; ENSMUSG00000019997; ENSMUSG00000036438; ENSMUSG00000017631; ENSMUSG00000037405; ENSMUSG00000021948; ENSMUSG00000031355; ENSMUSG00000044734; ENSMUSG00000026249; ENSMUSG00000005054; ENSMUSG00000026315; ENSMUSG00000030844;…	1249	1247
1.5993e-13	2.80812e-12	GO:0045576	b	4	mast cell activation	21898; 16822; 70450; 74734; 11541; 12229; 12506; 12523; 12802; 14125; 14127; 14130; 14131; 14159; 14191; 15368; 16165; 16190; 17096; 246746; 19267; 19354; 217303; 217304; 20963; 22038; 380732; 23880; 56743; 57914; 19419	ENSMUSG00000059498; ENSMUSG00000033467; ENSMUSG00000031264; ENSMUSG00000026656; ENSMUSG00000015355; ENSMUSG00000021457; ENSMUSG00000002699; ENSMUSG00000029204; ENSMUSG00000062585; ENSMUSG00000058715; ENSMUSG00000018500; ENSMUSG00000047798; ENSMUSG00000053158; ENSMUSG00000057948; ENSMUSG00000034652; ENSMUSG00000039005; ENSMUSG00000040528; ENSMUSG00000030748; ENSMUSG00000022148; ENSMUSG00000042228;…	70	70
4.01222e-13	6.95451e-12	GO:0002275	b	4	myeloid cell activation involved in immune response	66824; 84112; 68891; 70450; 171285; 94176; 74732; 11541; 109934; 11745; 12229; 12523; 12772; 14125; 14127; 14159; 14191; 15368; 16165; 16190; 16409; 16414; 16803; 17096; 17916; 19204; 19354; 20302; 217303; 20963; 22177; 380732; 56743; 19419	ENSMUSG00000000982; ENSMUSG00000040751; ENSMUSG00000031264; ENSMUSG00000030793; ENSMUSG00000028874; ENSMUSG00000058715; ENSMUSG00000056529; ENSMUSG00000017631; ENSMUSG00000018500; ENSMUSG00000027762; ENSMUSG00000029484; ENSMUSG00000053158; ENSMUSG00000016024; ENSMUSG00000049103; ENSMUSG00000034652; ENSMUSG00000039232; ENSMUSG00000030786; ENSMUSG00000057948; ENSMUSG00000030748; ENSMUSG00000030579;…	85	85
5.367e-13	9.18505e-12	GO:0045595	b	4	regulation of cell differentiation	65963; 105855; 13051; 66713; 101488212; 56792; 67141; 67263; 67399; 67628; 231633; 104156; 68169; 232174; 68588; 235505; 109901; 102657; 233781; 70450; 234396; 70717; 70809; 70839; 11820; 71660; 11951; 268396; 399558; 277360; 170741; 215653; 630146; 241568; 270120; 12262; 14456; 73710; 74048; 74117; 74131; 74186; 12393; 12394; 74511; 238377; 94352; 74748; 140570; 12550; 76709; 76044; 72828; 24064…	ENSMUSG00000037370; ENSMUSG00000040249; ENSMUSG00000038151; ENSMUSG00000038508; ENSMUSG00000018965; ENSMUSG00000022831; ENSMUSG00000029516; ENSMUSG00000046295; ENSMUSG00000028480; ENSMUSG00000031101; ENSMUSG00000031885; ENSMUSG00000027544; ENSMUSG00000031486; ENSMUSG00000032011; ENSMUSG00000030117; ENSMUSG00000000861; ENSMUSG00000042190; ENSMUSG00000074785; ENSMUSG00000030447; ENSMUSG00000019997;…	1919	1918
7.36679e-13	1.23601e-11	GO:0042060	b	4	wound healing	21898; 68169; 226101; 235505; 70839; 11891; 268697; 72461; 270152; 14456; 74012; 74777; 108101; 72828; 12798; 11687; 11747; 11815; 11853; 12306; 12495; 12505; 12527; 12767; 12772; 13808; 14026; 14058; 14067; 14068; 14127; 14178; 18810; 14726; 15170; 15200; 15357; 15368; 16000; 16193; 56193; 16402; 16416; 246256; 16948; 16952; 17096; 17312; 17381; 17700; 18173; 18479; 18590; 18707; 18753; 18761; 1…	ENSMUSG00000059089; ENSMUSG00000025856; ENSMUSG00000021262; ENSMUSG00000004665; ENSMUSG00000022565; ENSMUSG00000050989; ENSMUSG00000021948; ENSMUSG00000026249; ENSMUSG00000061119; ENSMUSG00000029664; ENSMUSG00000028583; ENSMUSG00000021822; ENSMUSG00000002233; ENSMUSG00000020592; ENSMUSG00000034127; ENSMUSG00000058427; ENSMUSG00000039936; ENSMUSG00000042228; ENSMUSG00000024965; ENSMUSG00000040152;…	389	389
7.40506e-13	1.23601e-11	GO:0031497	b	4	chromatin assembly	66578; 67628; 66336; 70645; 66929; 107435; 110749; 319188; 13163; 18602; 14957; 80838; 15361; 15364; 319159; 319160; 17216; 50709; 20682; 53605; 56702; 319148; 319149; 319150; 319153; 319154; 319157; 319158; 319161; 319178; 319180; 319181; 319183; 319184; 319185; 319187; 319189; 15201; 97908; 260423; 326619; 326620; 228536; 27221; 360198	ENSMUSG00000058385; ENSMUSG00000067455; ENSMUSG00000046711; ENSMUSG00000058773; ENSMUSG00000058799; ENSMUSG00000056758; ENSMUSG00000002835; ENSMUSG00000074403; ENSMUSG00000062727; ENSMUSG00000105827; ENSMUSG00000002870; ENSMUSG00000069267; ENSMUSG00000049539; ENSMUSG00000069266; ENSMUSG00000040007; ENSMUSG00000072980; ENSMUSG00000025330; ENSMUSG00000069308; ENSMUSG00000101972; ENSMUSG00000069300;…	140	140
2.11955e-12	3.49467e-11	GO:1903530	b	4	regulation of secretion by cell	21898; 54725; 66824; 230979; 67397; 56807; 213469; 232414; 68891; 69146; 102657; 70450; 70839; 11891; 170744; 269224; 171285; 171580; 14456; 12289; 55991; 23845; 12394; 238377; 94353; 74772; 12481; 140497; 11541; 109934; 11746; 11747; 11799; 12290; 12314; 12322; 12362; 12363; 12475; 12483; 12495; 12523; 12772; 12774; 12894; 12978; 13132; 242662; 24088; 14125; 14127; 14159; 14191; 14226; 14255; 14…	ENSMUSG00000040249; ENSMUSG00000045322; ENSMUSG00000022150; ENSMUSG00000020592; ENSMUSG00000016529; ENSMUSG00000036438; ENSMUSG00000029616; ENSMUSG00000018500; ENSMUSG00000027843; ENSMUSG00000036943; ENSMUSG00000031906; ENSMUSG00000015968; ENSMUSG00000004110; ENSMUSG00000026778; ENSMUSG00000034652; ENSMUSG00000063632; ENSMUSG00000000486; ENSMUSG00000058914; ENSMUSG00000069830; ENSMUSG00000074361;…	818	818
2.18303e-12	3.55597e-11	GO:0050920	b	4	regulation of chemotaxis	105855; 56792; 67263; 84112; 70839; 71660; 14456; 73710; 74748; 11601; 11629; 12182; 12267; 12273; 12317; 12767; 12768; 12772; 12977; 14068; 14164; 14172; 14205; 14289; 14747; 15945; 16176; 16803; 17096; 17700; 18600; 18654; 18787; 19141; 19229; 19271; 19354; 20293; 20296; 20302; 20303; 20306; 20343; 20354; 20947; 20355; 21803; 21825; 21828; 319430; 321019; 27007; 257632; 50930; 227541; 63873; 11…	ENSMUSG00000031380; ENSMUSG00000033220; ENSMUSG00000031486; ENSMUSG00000021451; ENSMUSG00000039145; ENSMUSG00000053318; ENSMUSG00000024397; ENSMUSG00000042190; ENSMUSG00000031465; ENSMUSG00000045382; ENSMUSG00000031443; ENSMUSG00000005824; ENSMUSG00000026100; ENSMUSG00000027762; ENSMUSG00000002603; ENSMUSG00000055994; ENSMUSG00000036585; ENSMUSG00000057967; ENSMUSG00000016024; ENSMUSG00000036353;…	216	216
2.2571e-12	3.63286e-11	GO:0000819	b	4	sister chromatid segregation	229841; 67052; 67141; 67177; 69716; 70099; 70218; 70385; 71819; 71988; 268697; 72107; 105988; 108907; 110033; 11799; 12235; 12704; 67849; 14156; 14211; 215387; 14841; 16571; 18005; 68549; 18817; 51944; 66977; 52276; 100502766; 381318; 20877; 73804; 54141; 21973; 22137; 66371; 56150; 23834; 56742; 21335; 107995; 12236; 381293; 26934; 59126; 72415; 83560; 54392; 228421; 16319	ENSMUSG00000040084; ENSMUSG00000028678; ENSMUSG00000010342; ENSMUSG00000038379; ENSMUSG00000069910; ENSMUSG00000024056; ENSMUSG00000002055; ENSMUSG00000045328; ENSMUSG00000017716; ENSMUSG00000034906; ENSMUSG00000024791; ENSMUSG00000022422; ENSMUSG00000023940; ENSMUSG00000030677; ENSMUSG00000006398; ENSMUSG00000041431; ENSMUSG00000034349; ENSMUSG00000034311; ENSMUSG00000020914; ENSMUSG00000030867;…	182	182
2.66637e-12	4.2411e-11	GO:0051338	b	4	regulation of transferase activity	21898; 229841; 105855; 66197; 66824; 56792; 67141; 67397; 11308; 330177; 16822; 69263; 70415; 11820; 104418; 268697; 72107; 72119; 72151; 215653; 269582; 50490; 14456; 237542; 434341; 74012; 74734; 74748; 231125; 76044; 72828; 240672; 240754; 214901; 11461; 208084; 404710; 11501; 11602; 114715; 12428; 12442; 12443; 12448; 12449; 12484; 12504; 12505; 12579; 12702; 12759; 12977; 12978; 13132; 13163…	ENSMUSG00000033721; ENSMUSG00000051998; ENSMUSG00000027460; ENSMUSG00000038508; ENSMUSG00000045322; ENSMUSG00000027469; ENSMUSG00000045328; ENSMUSG00000032584; ENSMUSG00000025856; ENSMUSG00000029204; ENSMUSG00000030562; ENSMUSG00000022015; ENSMUSG00000021948; ENSMUSG00000028613; ENSMUSG00000004266; ENSMUSG00000018822; ENSMUSG00000050315; ENSMUSG00000070348; ENSMUSG00000053113; ENSMUSG00000040479;…	910	910
3.09064e-12	4.85878e-11	GO:0009893	b	4	positive regulation of metabolic process	98496; 225872; 21898; 229841; 105855; 98878; 54722; 66197; 13051; 66713; 66824; 67092; 230979; 56792; 67177; 67397; 100182; 67557; 67628; 76843; 11308; 104156; 330177; 68040; 16822; 100952; 232174; 68891; 69263; 109901; 69585; 102657; 332397; 215114; 70415; 332579; 70472; 110075; 11820; 234779; 224829; 11891; 71373; 50723; 21426; 104418; 71660; 235534; 268396; 71816; 11983; 268697; 72107; 72119; …	ENSMUSG00000033721; ENSMUSG00000059498; ENSMUSG00000003873; ENSMUSG00000053192; ENSMUSG00000030117; ENSMUSG00000042190; ENSMUSG00000027381; ENSMUSG00000016529; ENSMUSG00000030562; ENSMUSG00000030560; ENSMUSG00000037405; ENSMUSG00000045322; ENSMUSG00000027843; ENSMUSG00000026796; ENSMUSG00000031907; ENSMUSG00000017146; ENSMUSG00000040479; ENSMUSG00000028333; ENSMUSG00000069830; ENSMUSG00000027544;…	3581	3580
3.42433e-12	5.32149e-11	GO:0044089	b	4	positive regulation of cellular component biogenesis	21898; 105855; 66573; 66713; 66824; 67177; 100952; 68743; 68792; 70839; 104252; 268396; 399558; 170643; 12125; 72754; 50490; 74117; 74772; 107581; 76709; 75974; 76123; 666048; 11687; 11853; 11867; 329679; 12028; 78473; 12122; 12484; 12631; 12721; 12759; 13845; 13860; 14026; 14086; 14159; 14219; 14260; 14283; 14744; 14784; 72333; 29875; 15511; 15894; 16069; 16180; 56193; 16423; 16476; 16979; 17342…	ENSMUSG00000003873; ENSMUSG00000058624; ENSMUSG00000021262; ENSMUSG00000027381; ENSMUSG00000030447; ENSMUSG00000019997; ENSMUSG00000030562; ENSMUSG00000037405; ENSMUSG00000020388; ENSMUSG00000090877; ENSMUSG00000050315; ENSMUSG00000031906; ENSMUSG00000023885; ENSMUSG00000075284; ENSMUSG00000020592; ENSMUSG00000025758; ENSMUSG00000029683; ENSMUSG00000021068; ENSMUSG00000044042; ENSMUSG00000005958;…	535	535
4.00776e-12	6.15738e-11	GO:0007229	b	4	integrin-mediated signaling pathway	16419; 16411; 68891; 108101; 12512; 13132; 14127; 14191; 14219; 56193; 16401; 16402; 16408; 16409; 16410; 16414; 16416; 16420; 16421; 16950; 19229; 20963; 381924; 21682; 21838; 21857; 21894; 22177; 22324; 23880; 57257; 223272; 27027; 192176	ENSMUSG00000033721; ENSMUSG00000021457; ENSMUSG00000019997; ENSMUSG00000001281; ENSMUSG00000058715; ENSMUSG00000000555; ENSMUSG00000025351; ENSMUSG00000000693; ENSMUSG00000000244; ENSMUSG00000022150; ENSMUSG00000032011; ENSMUSG00000001131; ENSMUSG00000070369; ENSMUSG00000022817; ENSMUSG00000027087; ENSMUSG00000032925; ENSMUSG00000034116; ENSMUSG00000030789; ENSMUSG00000030786; ENSMUSG00000026971;…	91	91
4.23789e-12	6.43778e-11	GO:0048285	b	4	organelle fission	229841; 66197; 66713; 67052; 67141; 67177; 232174; 68612; 69716; 70099; 70218; 70385; 104271; 71819; 268465; 268697; 72107; 72119; 105988; 237911; 74117; 73420; 108907; 240641; 214901; 110033; 11799; 77744; 12235; 12316; 12317; 12428; 12442; 12443; 12448; 12449; 12487; 12649; 12704; 13860; 67849; 14087; 14211; 215387; 14841; 15511; 16000; 16176; 16551; 16571; 17345; 17687; 17857; 17858; 17864; 18…	ENSMUSG00000040084; ENSMUSG00000023015; ENSMUSG00000018965; ENSMUSG00000029516; ENSMUSG00000027469; ENSMUSG00000045328; ENSMUSG00000090877; ENSMUSG00000070348; ENSMUSG00000022070; ENSMUSG00000027379; ENSMUSG00000020897; ENSMUSG00000034329; ENSMUSG00000025912; ENSMUSG00000039055; ENSMUSG00000019773; ENSMUSG00000062510; ENSMUSG00000021569; ENSMUSG00000051378; ENSMUSG00000037313; ENSMUSG00000027398;…	468	468
6.05158e-12	9.09082e-11	GO:0006333	b	4	chromatin assembly or disassembly	66578; 67628; 66336; 70645; 66929; 107435; 110749; 319188; 13163; 18602; 14957; 80838; 15361; 15364; 319159; 319160; 17216; 50709; 18600; 20682; 53605; 56702; 319148; 319149; 319150; 319153; 319154; 319157; 319158; 319161; 319162; 319178; 319180; 319181; 319183; 319184; 319185; 319187; 319189; 15201; 97908; 260423; 326619; 326620; 228536; 64707; 27221; 360198	ENSMUSG00000058385; ENSMUSG00000067455; ENSMUSG00000046711; ENSMUSG00000058773; ENSMUSG00000058799; ENSMUSG00000056758; ENSMUSG00000002835; ENSMUSG00000074403; ENSMUSG00000062727; ENSMUSG00000105827; ENSMUSG00000002870; ENSMUSG00000069267; ENSMUSG00000049539; ENSMUSG00000069266; ENSMUSG00000040007; ENSMUSG00000072980; ENSMUSG00000025330; ENSMUSG00000069308; ENSMUSG00000101972; ENSMUSG00000069300;…	164	164
6.36012e-12	9.44933e-11	GO:0032611	b	4	interleukin-1 beta production	21898; 13051; 66824; 84112; 69146; 17951; 11820; 268857; 268973; 170744; 55991; 11829; 12362; 12363; 12774; 24088; 637515; 16176; 18439; 19261; 20302; 20698; 54483; 21929; 216799; 383619; 216869; 21899; 257632; 195046	ENSMUSG00000030793; ENSMUSG00000022892; ENSMUSG00000049871; ENSMUSG00000027762; ENSMUSG00000055994; ENSMUSG00000071203; ENSMUSG00000037860; ENSMUSG00000039005; ENSMUSG00000069830; ENSMUSG00000029468; ENSMUSG00000051498; ENSMUSG00000033538; ENSMUSG00000022534; ENSMUSG00000027398; ENSMUSG00000022575; ENSMUSG00000061878; ENSMUSG00000000982; ENSMUSG00000025888; ENSMUSG00000039193; ENSMUSG00000027995;…	74	74
8.12719e-12	1.19434e-10	GO:0023057	b	4	negative regulation of signaling	98496; 21898; 13051; 230514; 66824; 56792; 100340; 16765; 330177; 100952; 232174; 232201; 68588; 68939; 69178; 235505; 69585; 66443; 104418; 268857; 12044; 12047; 269016; 170799; 215653; 14456; 434341; 237877; 74041; 74186; 12393; 74734; 50778; 12550; 231125; 666048; 109042; 76469; 72828; 240672; 240754; 11486; 240888; 11535; 114715; 11747; 11815; 11846; 12028; 12043; 12045; 12122; 12189; 12314; …	ENSMUSG00000099974; ENSMUSG00000040249; ENSMUSG00000051998; ENSMUSG00000046223; ENSMUSG00000067377; ENSMUSG00000003873; ENSMUSG00000045322; ENSMUSG00000052384; ENSMUSG00000032011; ENSMUSG00000030117; ENSMUSG00000057719; ENSMUSG00000029204; ENSMUSG00000036438; ENSMUSG00000019987; ENSMUSG00000037405; ENSMUSG00000021948; ENSMUSG00000026249; ENSMUSG00000027843; ENSMUSG00000004266; ENSMUSG00000030844;…	1305	1303
1.03812e-11	1.50919e-10	GO:1905517	b	4	macrophage migration	56792; 100952; 70839; 71660; 74748; 75458; 12267; 12273; 12977; 14747; 68279; 16854; 17387; 17700; 17925; 19229; 19271; 20293; 20296; 20302; 21825; 57781; 63873; 64095	ENSMUSG00000029254; ENSMUSG00000053318; ENSMUSG00000042190; ENSMUSG00000022667; ENSMUSG00000050335; ENSMUSG00000014158; ENSMUSG00000026100; ENSMUSG00000036353; ENSMUSG00000035385; ENSMUSG00000054400; ENSMUSG00000035352; ENSMUSG00000011008; ENSMUSG00000040552; ENSMUSG00000009281; ENSMUSG00000004677; ENSMUSG00000000957; ENSMUSG00000029163; ENSMUSG00000000982; ENSMUSG00000025314; ENSMUSG00000026271;…	50	50
1.18716e-11	1.70749e-10	GO:0042113	b	4	B cell activation	21898; 105855; 229499; 67742; 208154; 102545; 234396; 234779; 50723; 629871; 237877; 74131; 238447; 74748; 75974; 50931; 629845; 240754; 11486; 404711; 12028; 12043; 12182; 12229; 110785; 12483; 12484; 12487; 12524; 14130; 14255; 15170; 15242; 16016; 16019; 16071; 16153; 16186; 16193; 16196; 16197; 16331; 81897; 210293; 16848; 17060; 17079; 17095; 17096; 100123473; 17387; 18019; 74039; 14025; 187…	ENSMUSG00000033721; ENSMUSG00000051998; ENSMUSG00000003873; ENSMUSG00000031264; ENSMUSG00000046295; ENSMUSG00000026656; ENSMUSG00000000732; ENSMUSG00000029570; ENSMUSG00000027544; ENSMUSG00000076613; ENSMUSG00000053318; ENSMUSG00000038608; ENSMUSG00000000861; ENSMUSG00000104876; ENSMUSG00000076695; ENSMUSG00000016529; ENSMUSG00000089669; ENSMUSG00000024986; ENSMUSG00000045322; ENSMUSG00000040751;…	408	395
1.59607e-11	2.27145e-10	GO:0044772	b	4	mitotic cell cycle phase transition	229841; 66197; 67052; 67141; 67177; 67628; 76843; 330177; 68612; 77011; 69716; 70385; 11820; 104418; 268697; 269582; 106795; 237877; 108000; 404710; 11629; 11799; 12043; 12122; 12189; 12235; 12314; 12322; 12428; 12443; 12448; 12532; 12534; 12579; 12649; 12704; 13555; 13860; 67849; 14199; 14235; 237256; 14726; 14841; 15170; 15364; 16323; 16906; 16952; 17193; 18392; 18647; 18761; 18767; 18817; 6712…	ENSMUSG00000028044; ENSMUSG00000040084; ENSMUSG00000046591; ENSMUSG00000023092; ENSMUSG00000010342; ENSMUSG00000001403; ENSMUSG00000069910; ENSMUSG00000024056; ENSMUSG00000028068; ENSMUSG00000045328; ENSMUSG00000002297; ENSMUSG00000024397; ENSMUSG00000056758; ENSMUSG00000050410; ENSMUSG00000027490; ENSMUSG00000059060; ENSMUSG00000022892; ENSMUSG00000004446; ENSMUSG00000036438; ENSMUSG00000007080;…	351	351
2.31674e-11	3.26274e-10	GO:0002768	b	4	immune response-regulating cell surface receptor signaling pathway	105855; 56792; 68119; 16822; 208154; 102657; 210757; 234779; 50723; 12047; 629871; 238447; 629845; 240754; 11486; 404711; 12028; 12043; 78473; 12229; 12267; 12273; 110785; 12487; 24088; 14125; 14127; 14129; 14130; 14131; 14289; 14360; 243910; 14747; 14991; 15170; 16016; 16019; 16071; 16423; 16428; 16534; 246177; 16854; 246256; 17096; 100123473; 17474; 18019; 74039; 18751; 19260; 19264; 19271; 217…	ENSMUSG00000099974; ENSMUSG00000033721; ENSMUSG00000051998; ENSMUSG00000059498; ENSMUSG00000003873; ENSMUSG00000031264; ENSMUSG00000026656; ENSMUSG00000000732; ENSMUSG00000027544; ENSMUSG00000020437; ENSMUSG00000021457; ENSMUSG00000042190; ENSMUSG00000076695; ENSMUSG00000024696; ENSMUSG00000002699; ENSMUSG00000017652; ENSMUSG00000058715; ENSMUSG00000040751; ENSMUSG00000057058; ENSMUSG00000058099;…	347	334
2.47364e-11	3.4478e-10	GO:0042116	b	4	macrophage activation	21898; 13051; 56792; 84112; 11820; 170743; 170744; 171285; 77777; 11629; 12362; 12523; 12759; 24088; 14289; 16153; 16190; 81897; 16409; 16476; 16803; 16835; 17082; 17394; 18173; 19369; 20963; 21825; 21897; 22177; 21899	ENSMUSG00000044827; ENSMUSG00000045322; ENSMUSG00000016529; ENSMUSG00000024397; ENSMUSG00000005800; ENSMUSG00000022892; ENSMUSG00000052684; ENSMUSG00000079685; ENSMUSG00000027762; ENSMUSG00000026177; ENSMUSG00000026069; ENSMUSG00000016024; ENSMUSG00000022037; ENSMUSG00000039005; ENSMUSG00000030786; ENSMUSG00000051498; ENSMUSG00000030748; ENSMUSG00000044583; ENSMUSG00000029254; ENSMUSG00000021457;…	82	82
9.08483e-11	1.25334e-09	GO:0016192	b	4	vesicle-mediated transport	105855; 98878; 66141; 230514; 54598; 66824; 56792; 67397; 56807; 67844; 231830; 231834; 11801; 232201; 213469; 232414; 68891; 66102; 69178; 69608; 241062; 215114; 70450; 11820; 234779; 497097; 11891; 71602; 268451; 104759; 72729; 629871; 105785; 171580; 237253; 94176; 270160; 14456; 12289; 106572; 74015; 74190; 94352; 238447; 100689; 74732; 74772; 140580; 140780; 233571; 83433; 629845; 12798; 114…	ENSMUSG00000033721; ENSMUSG00000040249; ENSMUSG00000073678; ENSMUSG00000026712; ENSMUSG00000031264; ENSMUSG00000026656; ENSMUSG00000039145; ENSMUSG00000020592; ENSMUSG00000076695; ENSMUSG00000017639; ENSMUSG00000004665; ENSMUSG00000036438; ENSMUSG00000029616; ENSMUSG00000018500; ENSMUSG00000015854; ENSMUSG00000024371; ENSMUSG00000049866; ENSMUSG00000028613; ENSMUSG00000039959; ENSMUSG00000032220;…	1554	1540
9.51996e-11	1.3001e-09	GO:0001773	b	4	myeloid dendritic cell activation	66824; 170741; 171285; 94176; 74481; 12493; 16153; 17474; 18106; 18733; 19664; 53314; 21803; 21950; 20375; 24108; 27007; 27027; 75766	ENSMUSG00000030144; ENSMUSG00000004709; ENSMUSG00000030798; ENSMUSG00000034266; ENSMUSG00000000244; ENSMUSG00000002603; ENSMUSG00000002111; ENSMUSG00000066684; ENSMUSG00000020399; ENSMUSG00000030793; ENSMUSG00000030149; ENSMUSG00000039699; ENSMUSG00000058818; ENSMUSG00000022303; ENSMUSG00000035678; ENSMUSG00000016529; ENSMUSG00000035186; ENSMUSG00000020143; ENSMUSG00000039191	36	35
9.91924e-11	1.34108e-09	GO:0030832	b	4	regulation of actin filament length	105855; 66713; 66824; 50874; 104252; 277360; 170643; 74117; 76709; 11687; 11867; 12332; 12631; 12704; 12721; 24088; 13860; 14026; 14260; 14784; 15163; 15894; 56193; 17886; 50918; 67771; 18643; 215280; 18753; 19229; 19240; 19241; 20401; 20430; 20739; 20947; 22003; 22323; 22351; 22376; 22388; 319262; 320502; 544963; 93675; 93677; 23999; 30948; 63986	ENSMUSG00000022831; ENSMUSG00000006304; ENSMUSG00000031165; ENSMUSG00000032366; ENSMUSG00000030793; ENSMUSG00000023277; ENSMUSG00000021262; ENSMUSG00000030447; ENSMUSG00000045664; ENSMUSG00000030403; ENSMUSG00000029622; ENSMUSG00000021948; ENSMUSG00000060791; ENSMUSG00000068566; ENSMUSG00000079523; ENSMUSG00000029516; ENSMUSG00000026532; ENSMUSG00000022443; ENSMUSG00000018924; ENSMUSG00000049775;…	182	182
1.34909e-10	1.77134e-09	GO:0051726	b	4	regulation of cell cycle	271697; 229841; 66197; 67052; 101488212; 67141; 67177; 67628; 76843; 68014; 330177; 68567; 68612; 77011; 69716; 70385; 11820; 104418; 71819; 268451; 268465; 268697; 72119; 208628; 105278; 12125; 269582; 237877; 74041; 270906; 73420; 108000; 76123; 108907; 108961; 240641; 68026; 11461; 11629; 11799; 12028; 12043; 12122; 12189; 77744; 12235; 12314; 12316; 12317; 12399; 12428; 12442; 12443; 12448; 1…	ENSMUSG00000040084; ENSMUSG00000046591; ENSMUSG00000003873; ENSMUSG00000029516; ENSMUSG00000027469; ENSMUSG00000045328; ENSMUSG00000027381; ENSMUSG00000017639; ENSMUSG00000017499; ENSMUSG00000016529; ENSMUSG00000019997; ENSMUSG00000036438; ENSMUSG00000018965; ENSMUSG00000003779; ENSMUSG00000004266; ENSMUSG00000090877; ENSMUSG00000029161; ENSMUSG00000070348; ENSMUSG00000022070; ENSMUSG00000017146;…	987	987
1.34947e-10	1.77134e-09	GO:0001774	b	4	microglial cell activation	21898; 13051; 56792; 11820; 170743; 170744; 11629; 12362; 12759; 24088; 14289; 81897; 16409; 16476; 16835; 17394; 21897; 21899	ENSMUSG00000052270; ENSMUSG00000025888; ENSMUSG00000051498; ENSMUSG00000045322; ENSMUSG00000030786; ENSMUSG00000027995; ENSMUSG00000040522; ENSMUSG00000024397; ENSMUSG00000052336; ENSMUSG00000032193; ENSMUSG00000044583; ENSMUSG00000005800; ENSMUSG00000029254; ENSMUSG00000022892; ENSMUSG00000022037; ENSMUSG00000052684; ENSMUSG00000044827; ENSMUSG00000039005	32	32
1.34947e-10	1.77134e-09	GO:0002269	b	4	leukocyte activation involved in inflammatory response	21898; 13051; 56792; 11820; 170743; 170744; 11629; 12362; 12759; 24088; 14289; 81897; 16409; 16476; 16835; 17394; 21897; 21899	ENSMUSG00000052270; ENSMUSG00000025888; ENSMUSG00000051498; ENSMUSG00000045322; ENSMUSG00000030786; ENSMUSG00000027995; ENSMUSG00000040522; ENSMUSG00000024397; ENSMUSG00000052336; ENSMUSG00000032193; ENSMUSG00000044583; ENSMUSG00000005800; ENSMUSG00000029254; ENSMUSG00000022892; ENSMUSG00000022037; ENSMUSG00000052684; ENSMUSG00000044827; ENSMUSG00000039005	32	32
1.40467e-10	1.82607e-09	GO:0006259	b	4	DNA metabolic process	66578; 66713; 67141; 67177; 67196; 67276; 76843; 330177; 77011; 101831; 69263; 69270; 69537; 69716; 69745; 69885; 233826; 70024; 70099; 102871; 234258; 234396; 70603; 11811; 50723; 104271; 268465; 71988; 72107; 72151; 269582; 208836; 50490; 237877; 237911; 107373; 110749; 67967; 75317; 272551; 214763; 108961; 50931; 68026; 214901; 208084; 110033; 11745; 11783; 11810; 12021; 12028; 12189; 77782; 1…	ENSMUSG00000046591; ENSMUSG00000003873; ENSMUSG00000048251; ENSMUSG00000046295; ENSMUSG00000025856; ENSMUSG00000019997; ENSMUSG00000030562; ENSMUSG00000007080; ENSMUSG00000021948; ENSMUSG00000026796; ENSMUSG00000002111; ENSMUSG00000028587; ENSMUSG00000006678; ENSMUSG00000017146; ENSMUSG00000004698; ENSMUSG00000020897; ENSMUSG00000034329; ENSMUSG00000019773; ENSMUSG00000026395; ENSMUSG00000021569;…	919	918
1.95441e-10	2.51654e-09	GO:0060627	b	4	regulation of vesicle-mediated transport	105855; 98878; 66824; 56792; 56807; 213469; 68891; 215114; 70450; 234779; 11891; 171580; 94176; 14456; 12289; 106572; 74772; 140780; 12798; 11541; 109934; 11687; 12010; 12263; 12306; 12314; 12317; 12322; 12475; 12483; 12512; 12523; 12721; 12759; 12772; 13057; 13132; 78771; 242662; 24088; 14125; 14127; 14129; 14130; 14131; 14159; 14191; 14299; 14678; 15162; 80838; 15368; 16016; 16019; 16165; 16176…	ENSMUSG00000040249; ENSMUSG00000059498; ENSMUSG00000026656; ENSMUSG00000039145; ENSMUSG00000004665; ENSMUSG00000036438; ENSMUSG00000017631; ENSMUSG00000018500; ENSMUSG00000024371; ENSMUSG00000039959; ENSMUSG00000068227; ENSMUSG00000031906; ENSMUSG00000015968; ENSMUSG00000076617; ENSMUSG00000034652; ENSMUSG00000020592; ENSMUSG00000076613; ENSMUSG00000026395; ENSMUSG00000000486; ENSMUSG00000027398;…	578	578
2.58057e-10	3.29144e-09	GO:0002758	b	4	innate immune response-activating signal transduction	21898; 100340; 234311; 71481; 279572; 170743; 170744; 171285; 239081; 12475; 12524; 13057; 24088; 54445; 81897; 16365; 226421; 16803; 414084; 83490; 17087; 17096; 246746; 80861; 19260; 20128; 217303; 21897; 21926; 21929; 382551; 233079; 216869; 56496; 211550; 21899; 140792; 27007; 257632; 225471; 54123	ENSMUSG00000044827; ENSMUSG00000067377; ENSMUSG00000028028; ENSMUSG00000022126; ENSMUSG00000056130; ENSMUSG00000052688; ENSMUSG00000045322; ENSMUSG00000006519; ENSMUSG00000047798; ENSMUSG00000025779; ENSMUSG00000028885; ENSMUSG00000027843; ENSMUSG00000055994; ENSMUSG00000016024; ENSMUSG00000036103; ENSMUSG00000036908; ENSMUSG00000024401; ENSMUSG00000034652; ENSMUSG00000039005; ENSMUSG00000069607;…	141	141
2.62518e-10	3.31704e-09	GO:1904951	b	4	positive regulation of establishment of protein localization	21898; 54725; 66824; 230979; 56807; 67628; 232414; 69146; 102657; 170744; 171285; 14456; 12289; 55991; 74117; 23845; 238377; 74772; 12481; 140497; 12550; 76709; 240641; 12189; 12362; 12363; 12475; 12523; 12534; 12774; 12978; 24088; 13605; 14191; 14255; 14360; 637515; 15040; 15163; 15482; 15559; 16000; 54445; 16153; 16172; 16176; 16180; 16190; 16193; 81799; 16409; 16534; 16846; 16971; 17082; 17381…	ENSMUSG00000040249; ENSMUSG00000022831; ENSMUSG00000016529; ENSMUSG00000021948; ENSMUSG00000027843; ENSMUSG00000017146; ENSMUSG00000015968; ENSMUSG00000026778; ENSMUSG00000019843; ENSMUSG00000028333; ENSMUSG00000069830; ENSMUSG00000027398; ENSMUSG00000000982; ENSMUSG00000002897; ENSMUSG00000067786; ENSMUSG00000033467; ENSMUSG00000006304; ENSMUSG00000032487; ENSMUSG00000009292; ENSMUSG00000070390;…	453	453
2.84257e-10	3.55848e-09	GO:0061640	b	4	cytoskeleton-dependent cytokinesis	66713; 67177; 16765; 68743; 71819; 71877; 80986; 74117; 108907; 240641; 11799; 11853; 12631; 12704; 13163; 13605; 16571; 74107; 18817; 18951; 19348; 216049; 20362; 20877; 66371; 56526; 24050; 26934; 28105; 54204; 207175; 16319	ENSMUSG00000029516; ENSMUSG00000026341; ENSMUSG00000017716; ENSMUSG00000024795; ENSMUSG00000036777; ENSMUSG00000018398; ENSMUSG00000037725; ENSMUSG00000072214; ENSMUSG00000003779; ENSMUSG00000033949; ENSMUSG00000023015; ENSMUSG00000034311; ENSMUSG00000030867; ENSMUSG00000002233; ENSMUSG00000020897; ENSMUSG00000024989; ENSMUSG00000000486; ENSMUSG00000027699; ENSMUSG00000037855; ENSMUSG00000056201;…	94	94
3.07082e-10	3.80392e-09	GO:0007051	b	4	spindle organization	76478; 229841; 66311; 66442; 67052; 67141; 16765; 69885; 71819; 71877; 268697; 72119; 105988; 73420; 76123; 11799; 77744; 12316; 51791; 15511; 212307; 16551; 16571; 17886; 18005; 18817; 51944; 19385; 66977; 100502766; 20460; 20620; 20877; 20878; 54141; 22154; 22350; 66371; 56742; 21335; 107995; 26934; 28105; 192176; 193740; 54204	ENSMUSG00000023015; ENSMUSG00000024056; ENSMUSG00000027469; ENSMUSG00000045328; ENSMUSG00000052397; ENSMUSG00000005732; ENSMUSG00000022443; ENSMUSG00000028718; ENSMUSG00000006398; ENSMUSG00000041431; ENSMUSG00000090877; ENSMUSG00000052087; ENSMUSG00000028832; ENSMUSG00000024277; ENSMUSG00000034311; ENSMUSG00000091971; ENSMUSG00000030867; ENSMUSG00000027331; ENSMUSG00000022070; ENSMUSG00000033952;…	170	170
3.0949e-10	3.80392e-09	GO:0007162	b	4	negative regulation of cell adhesion	230979; 208154; 69769; 102657; 171285; 74048; 12394; 140570; 12550; 72828; 240754; 11501; 11601; 11815; 11846; 11856; 54712; 12399; 12400; 12484; 12505; 12519; 12524; 12527; 12631; 237256; 243910; 14538; 14961; 14991; 15170; 16153; 16181; 16190; 16854; 16950; 16952; 16971; 17381; 17387; 17916; 17926; 50918; 18753; 18787; 19260; 19264; 20354; 217303; 20737; 20947; 107321; 21803; 21825; 21923; 2192…	ENSMUSG00000040249; ENSMUSG00000013707; ENSMUSG00000002603; ENSMUSG00000026697; ENSMUSG00000000957; ENSMUSG00000051998; ENSMUSG00000042333; ENSMUSG00000074785; ENSMUSG00000024696; ENSMUSG00000021360; ENSMUSG00000016529; ENSMUSG00000031465; ENSMUSG00000004530; ENSMUSG00000051457; ENSMUSG00000021948; ENSMUSG00000031355; ENSMUSG00000050335; ENSMUSG00000036931; ENSMUSG00000027843; ENSMUSG00000004266;…	280	280
3.39436e-10	4.13439e-09	GO:0036230	b	4	granulocyte activation	68891; 74732; 109934; 11745; 12772; 14127; 16173; 16174; 16409; 16414; 246256; 17916; 18753; 19204; 20302; 20311; 217303; 20963; 22177	ENSMUSG00000000982; ENSMUSG00000024300; ENSMUSG00000029484; ENSMUSG00000039217; ENSMUSG00000000290; ENSMUSG00000039232; ENSMUSG00000021948; ENSMUSG00000021457; ENSMUSG00000026068; ENSMUSG00000030786; ENSMUSG00000052212; ENSMUSG00000059089; ENSMUSG00000049103; ENSMUSG00000029371; ENSMUSG00000030579; ENSMUSG00000058715; ENSMUSG00000056529; ENSMUSG00000017631; ENSMUSG00000034652	37	37
3.69146e-10	4.45612e-09	GO:0001910	b	4	regulation of leukocyte mediated cytotoxicity	54725; 56792; 171285; 77777; 11846; 12010; 110557; 14825; 14964; 14991; 15015; 15018; 15024; 15040; 80782; 16174; 16197; 16409; 16846; 18439; 19264; 19368; 19369; 19370; 20296; 20311; 20400; 22177; 22324; 216869; 56532; 56554; 19419; 27007	ENSMUSG00000029380; ENSMUSG00000067212; ENSMUSG00000059201; ENSMUSG00000079491; ENSMUSG00000034116; ENSMUSG00000032076; ENSMUSG00000079298; ENSMUSG00000079685; ENSMUSG00000026068; ENSMUSG00000026395; ENSMUSG00000029468; ENSMUSG00000030786; ENSMUSG00000030149; ENSMUSG00000022221; ENSMUSG00000030579; ENSMUSG00000073409; ENSMUSG00000029254; ENSMUSG00000019987; ENSMUSG00000029371; ENSMUSG00000073411;…	105	105
4.17805e-10	4.99887e-09	GO:0002285	b	4	lymphocyte activation involved in immune response	21898; 70450; 234779; 11891; 50723; 171285; 237877; 74732; 75974; 50931; 11486; 12487; 12721; 12772; 13813; 14127; 243910; 14991; 15894; 16173; 16190; 16193; 16408; 210293; 16848; 16854; 16950; 16952; 17079; 17085; 17474; 18106; 18173; 18826; 19229; 19264; 53314; 20737; 20947; 54519; 21803; 21929; 21939; 216799; 56619; 238875; 69583; 321019; 26909; 224860	ENSMUSG00000026786; ENSMUSG00000017652; ENSMUSG00000000732; ENSMUSG00000038608; ENSMUSG00000046006; ENSMUSG00000021998; ENSMUSG00000029570; ENSMUSG00000089669; ENSMUSG00000026395; ENSMUSG00000058715; ENSMUSG00000030707; ENSMUSG00000032202; ENSMUSG00000050335; ENSMUSG00000030142; ENSMUSG00000034266; ENSMUSG00000000693; ENSMUSG00000002603; ENSMUSG00000039232; ENSMUSG00000032446; ENSMUSG00000057948;…	195	195
4.65699e-10	5.52303e-09	GO:0051283	b	4	negative regulation of sequestering of calcium ion	68460; 69810; 234779; 71912; 433294; 74777; 233571; 72828; 171166; 76757; 11747; 12028; 12314; 12373; 12721; 12774; 13057; 14103; 14226; 15170; 15559; 15945; 16410; 16416; 68279; 17096; 18439; 19229; 19264; 19414; 20191; 20302; 21803; 21838; 23832; 20541; 233979; 28240	ENSMUSG00000020635; ENSMUSG00000003873; ENSMUSG00000009292; ENSMUSG00000036438; ENSMUSG00000050989; ENSMUSG00000030707; ENSMUSG00000033044; ENSMUSG00000004266; ENSMUSG00000002603; ENSMUSG00000032011; ENSMUSG00000027861; ENSMUSG00000047343; ENSMUSG00000011008; ENSMUSG00000060509; ENSMUSG00000054640; ENSMUSG00000006519; ENSMUSG00000026228; ENSMUSG00000026395; ENSMUSG00000048779; ENSMUSG00000030147;…	127	127
5.2946e-10	6.22461e-09	GO:0006873	b	4	cellular ion homeostasis	13051; 66815; 67972; 68460; 331004; 232975; 69585; 69810; 11820; 234779; 110895; 71877; 71912; 433294; 236727; 270160; 12289; 74748; 74772; 74777; 233571; 72828; 15203; 207777; 171166; 76757; 11535; 11747; 11928; 12028; 12043; 242341; 12267; 12273; 12290; 12306; 12314; 12373; 12484; 12504; 12709; 12721; 12767; 12768; 12771; 12772; 12774; 13009; 13057; 78826; 14103; 14226; 14289; 14299; 14325; 143…	ENSMUSG00000040249; ENSMUSG00000021665; ENSMUSG00000003873; ENSMUSG00000042190; ENSMUSG00000036438; ENSMUSG00000050989; ENSMUSG00000050708; ENSMUSG00000024270; ENSMUSG00000047343; ENSMUSG00000052336; ENSMUSG00000031906; ENSMUSG00000015968; ENSMUSG00000004110; ENSMUSG00000054640; ENSMUSG00000019843; ENSMUSG00000063142; ENSMUSG00000026395; ENSMUSG00000048779; ENSMUSG00000028238; ENSMUSG00000074361;…	676	676
6.51624e-10	7.59479e-09	GO:0007599	b	4	hemostasis	21898; 70839; 11891; 14456; 74012; 108101; 72828; 11747; 12306; 12495; 12527; 14026; 14058; 14067; 14068; 14127; 14726; 15170; 56193; 16416; 17096; 18590; 18707; 18753; 18761; 18787; 18792; 19128; 19271; 216350; 20202; 20963; 21682; 21825; 20344; 56744; 20720; 26362; 26570; 27027; 15442; 30955; 21788; 21789	ENSMUSG00000022912; ENSMUSG00000029664; ENSMUSG00000048120; ENSMUSG00000035273; ENSMUSG00000025856; ENSMUSG00000021457; ENSMUSG00000021262; ENSMUSG00000031443; ENSMUSG00000058715; ENSMUSG00000031444; ENSMUSG00000000244; ENSMUSG00000021948; ENSMUSG00000032202; ENSMUSG00000026249; ENSMUSG00000004266; ENSMUSG00000036894; ENSMUSG00000026579; ENSMUSG00000036353; ENSMUSG00000029373; ENSMUSG00000028583;…	162	162
6.70679e-10	7.75007e-09	GO:0043254	b	4	regulation of protein complex assembly	21898; 105855; 66713; 66824; 67177; 16765; 50874; 70839; 104252; 277360; 268857; 170643; 12125; 74117; 74202; 76709; 666048; 11687; 11853; 11867; 329679; 12028; 78473; 12122; 12332; 12484; 12631; 12721; 12759; 12955; 24088; 13860; 14026; 14086; 14159; 14260; 14283; 14784; 72333; 15162; 15163; 15511; 15894; 16069; 56193; 16476; 16800; 17342; 17392; 17698; 17886; 18080; 50918; 67771; 18479; 18643; …	ENSMUSG00000003873; ENSMUSG00000022831; ENSMUSG00000058624; ENSMUSG00000021262; ENSMUSG00000027381; ENSMUSG00000030447; ENSMUSG00000037405; ENSMUSG00000021948; ENSMUSG00000090877; ENSMUSG00000049775; ENSMUSG00000036353; ENSMUSG00000029683; ENSMUSG00000044042; ENSMUSG00000030365; ENSMUSG00000022488; ENSMUSG00000070867; ENSMUSG00000023277; ENSMUSG00000028832; ENSMUSG00000006304; ENSMUSG00000031165;…	454	454
7.15693e-10	8.20014e-09	GO:0034728	b	4	nucleosome organization	66578; 67628; 66336; 70645; 66929; 107435; 110749; 319188; 13163; 18602; 14957; 80838; 319159; 319160; 17216; 50709; 20682; 53605; 56702; 319148; 319149; 319150; 319153; 319154; 319157; 319158; 319161; 319162; 319178; 319180; 319181; 319183; 319184; 319185; 319187; 319189; 97908; 260423; 326619; 326620; 27221; 360198	ENSMUSG00000058385; ENSMUSG00000067455; ENSMUSG00000058773; ENSMUSG00000058799; ENSMUSG00000002835; ENSMUSG00000074403; ENSMUSG00000062727; ENSMUSG00000105827; ENSMUSG00000002870; ENSMUSG00000002307; ENSMUSG00000049539; ENSMUSG00000069266; ENSMUSG00000072980; ENSMUSG00000025330; ENSMUSG00000069308; ENSMUSG00000101972; ENSMUSG00000069300; ENSMUSG00000069274; ENSMUSG00000022978; ENSMUSG00000060639;…	151	151
7.34184e-10	8.34132e-09	GO:0042742	b	4	defense response to bacterium	21898; 66824; 230979; 69146; 240913; 17951; 332579; 71660; 268973; 629871; 171285; 238447; 100689; 74748; 50931; 629845; 404711; 11745; 12273; 110785; 12504; 231507; 13057; 24088; 14127; 14129; 14191; 14469; 14991; 15040; 15162; 15439; 15900; 16016; 16019; 16069; 16071; 16153; 81897; 16803; 16819; 17105; 17110; 100123473; 17474; 17476; 17916; 17948; 17952; 17969; 18173; 18439; 18753; 18787; 19074…	ENSMUSG00000021457; ENSMUSG00000030144; ENSMUSG00000045322; ENSMUSG00000058385; ENSMUSG00000026928; ENSMUSG00000067212; ENSMUSG00000028270; ENSMUSG00000030793; ENSMUSG00000028874; ENSMUSG00000029322; ENSMUSG00000042333; ENSMUSG00000104876; ENSMUSG00000076695; ENSMUSG00000016529; ENSMUSG00000062727; ENSMUSG00000058715; ENSMUSG00000003283; ENSMUSG00000006519; ENSMUSG00000021948; ENSMUSG00000028362;…	442	413
7.62594e-10	8.56251e-09	GO:0035690	b	4	cellular response to drug	70415; 70839; 11951; 71805; 433294; 394436; 433766; 14456; 12292; 74748; 74777; 12550; 76709; 11461; 11513; 11629; 11846; 12189; 12373; 12428; 12515; 12534; 12631; 13057; 13058; 13163; 13605; 67865; 14276; 14360; 14678; 15234; 15364; 15368; 16153; 16174; 16176; 16193; 81897; 16365; 16416; 16800; 16819; 16952; 17700; 17751; 17869; 18753; 18787; 215449; 19204; 19225; 19260; 19261; 19361; 19385; 201…	ENSMUSG00000025877; ENSMUSG00000032939; ENSMUSG00000035373; ENSMUSG00000045322; ENSMUSG00000006304; ENSMUSG00000032487; ENSMUSG00000030156; ENSMUSG00000053318; ENSMUSG00000024397; ENSMUSG00000056758; ENSMUSG00000028864; ENSMUSG00000016529; ENSMUSG00000005732; ENSMUSG00000052681; ENSMUSG00000056529; ENSMUSG00000019987; ENSMUSG00000050989; ENSMUSG00000002111; ENSMUSG00000037902; ENSMUSG00000021948;…	379	379
7.6632e-10	8.56251e-09	GO:0051282	b	4	regulation of sequestering of calcium ion	68460; 69810; 234779; 71912; 433294; 74777; 233571; 72828; 171166; 76757; 11747; 12028; 12314; 12373; 12721; 12774; 13057; 14103; 14226; 15170; 15559; 15945; 16410; 16416; 68279; 17096; 18439; 19229; 19264; 19414; 20191; 20302; 21803; 21838; 23832; 20541; 233979; 28240	ENSMUSG00000020635; ENSMUSG00000003873; ENSMUSG00000009292; ENSMUSG00000036438; ENSMUSG00000050989; ENSMUSG00000030707; ENSMUSG00000033044; ENSMUSG00000004266; ENSMUSG00000002603; ENSMUSG00000032011; ENSMUSG00000027861; ENSMUSG00000047343; ENSMUSG00000011008; ENSMUSG00000060509; ENSMUSG00000054640; ENSMUSG00000006519; ENSMUSG00000026228; ENSMUSG00000026395; ENSMUSG00000048779; ENSMUSG00000030147;…	129	129
1.19809e-09	1.32772e-08	GO:0048514	b	4	blood vessel morphogenesis	13051; 54598; 239027; 68169; 100952; 68792; 109901; 71602; 72324; 72461; 12394; 94352; 108961; 11501; 11535; 11601; 11602; 114715; 11745; 12028; 12142; 12189; 12267; 12273; 12306; 12370; 12767; 12771; 12772; 12822; 12837; 13036; 13058; 13845; 14048; 14103; 14164; 14172; 14205; 14219; 14235; 14991; 15117; 15200; 15234; 15242; 15364; 15368; 15945; 16153; 16173; 16176; 16402; 16410; 16414; 16416; 16…	ENSMUSG00000033721; ENSMUSG00000040249; ENSMUSG00000038151; ENSMUSG00000027460; ENSMUSG00000003873; ENSMUSG00000025856; ENSMUSG00000016529; ENSMUSG00000019997; ENSMUSG00000061119; ENSMUSG00000032220; ENSMUSG00000022367; ENSMUSG00000042607; ENSMUSG00000057967; ENSMUSG00000017146; ENSMUSG00000004698; ENSMUSG00000023885; ENSMUSG00000001034; ENSMUSG00000059201; ENSMUSG00000063506; ENSMUSG00000015340;…	618	618
1.42053e-09	1.56142e-08	GO:0031323	b	4	regulation of cellular metabolic process	108167344; 98496; 225872; 21898; 21917; 229841; 105855; 100041194; 623121; 66107; 98878; 54722; 66197; 66222; 66395; 100041677; 13051; 66578; 66713; 100041979; 66824; 66889; 230979; 56792; 67141; 67177; 67397; 100182; 67557; 67628; 67742; 231655; 11308; 104156; 330177; 68040; 16822; 100952; 68792; 77011; 68891; 100044193; 100503000; 233060; 69263; 626391; 235505; 69550; 109901; 69585; 69885; 1026…	ENSMUSG00000033721; ENSMUSG00000046591; ENSMUSG00000003873; ENSMUSG00000053192; ENSMUSG00000030117; ENSMUSG00000042190; ENSMUSG00000027381; ENSMUSG00000030447; ENSMUSG00000016529; ENSMUSG00000079685; ENSMUSG00000030562; ENSMUSG00000030560; ENSMUSG00000037405; ENSMUSG00000045322; ENSMUSG00000005054; ENSMUSG00000026796; ENSMUSG00000050315; ENSMUSG00000031907; ENSMUSG00000017146; ENSMUSG00000040479;…	5876	5871
2.84625e-09	3.10333e-08	GO:0045428	b	4	regulation of nitric oxide biosynthetic process	21898; 13051; 77777; 11605; 11629; 12759; 24088; 14991; 15894; 16000; 16153; 16176; 16193; 16414; 16423; 17394; 19225; 19229; 19261; 19288; 19369; 21926; 21899; 58994; 27007	ENSMUSG00000055447; ENSMUSG00000031266; ENSMUSG00000032487; ENSMUSG00000024397; ENSMUSG00000005800; ENSMUSG00000016529; ENSMUSG00000027832; ENSMUSG00000037405; ENSMUSG00000079685; ENSMUSG00000031906; ENSMUSG00000022037; ENSMUSG00000024401; ENSMUSG00000039005; ENSMUSG00000020053; ENSMUSG00000051498; ENSMUSG00000030149; ENSMUSG00000027398; ENSMUSG00000000290; ENSMUSG00000059456; ENSMUSG00000027995;…	67	67
2.90564e-09	3.14274e-08	GO:0051171	b	4	regulation of nitrogen compound metabolic process	108167344; 98496; 225872; 21898; 21917; 229841; 105855; 100041194; 623121; 66107; 98878; 54722; 66197; 66222; 66395; 100041677; 13051; 66578; 66713; 100041979; 66824; 66889; 230979; 56792; 67141; 67177; 67397; 100182; 67557; 67628; 67742; 231655; 76843; 11308; 104156; 330177; 68040; 16822; 100952; 84112; 77011; 100044193; 100503000; 233060; 69263; 626391; 235505; 69550; 109901; 69585; 69885; 1026…	ENSMUSG00000046591; ENSMUSG00000003873; ENSMUSG00000053192; ENSMUSG00000030117; ENSMUSG00000042190; ENSMUSG00000027381; ENSMUSG00000030447; ENSMUSG00000016529; ENSMUSG00000079685; ENSMUSG00000030562; ENSMUSG00000030560; ENSMUSG00000037405; ENSMUSG00000045322; ENSMUSG00000005054; ENSMUSG00000026796; ENSMUSG00000050315; ENSMUSG00000031907; ENSMUSG00000017146; ENSMUSG00000004698; ENSMUSG00000019773;…	5589	5584
3.70909e-09	3.97992e-08	GO:0010243	b	4	response to organonitrogen compound	98496; 21898; 230514; 66713; 67092; 104174; 232975; 332579; 70789; 70839; 11820; 234779; 71660; 11951; 72607; 50490; 237542; 12292; 55991; 106572; 237911; 74777; 107581; 12550; 76709; 233571; 83433; 76267; 231207; 11461; 11486; 12843; 11629; 11747; 11810; 11821; 11846; 12189; 12273; 12314; 12322; 12362; 12363; 12373; 12428; 12443; 12527; 12534; 12631; 12702; 12832; 12833; 13057; 13058; 13433; 240…	ENSMUSG00000040249; ENSMUSG00000038508; ENSMUSG00000045322; ENSMUSG00000026656; ENSMUSG00000030447; ENSMUSG00000016529; ENSMUSG00000019997; ENSMUSG00000036438; ENSMUSG00000030562; ENSMUSG00000050989; ENSMUSG00000037405; ENSMUSG00000021948; ENSMUSG00000027843; ENSMUSG00000040907; ENSMUSG00000030844; ENSMUSG00000029661; ENSMUSG00000070348; ENSMUSG00000053113; ENSMUSG00000017146; ENSMUSG00000001119;…	984	984
3.95122e-09	4.20634e-08	GO:0097191	b	4	extrinsic apoptotic signaling pathway	66824; 12044; 12047; 12125; 12028; 12043; 12045; 12070; 12122; 12189; 12370; 12399; 13132; 14048; 14049; 14051; 14103; 14360; 15234; 15368; 15894; 81535; 16000; 16173; 16176; 16196; 16323; 16410; 16819; 16854; 16905; 17210; 73689; 18439; 18611; 18787; 11910; 19264; 20612; 414801; 21803; 21825; 21926; 21929; 21938; 21944; 22029; 56744; 56772; 27279; 23939; 64294; 97165	ENSMUSG00000099974; ENSMUSG00000025932; ENSMUSG00000003873; ENSMUSG00000040329; ENSMUSG00000028063; ENSMUSG00000023905; ENSMUSG00000053192; ENSMUSG00000037411; ENSMUSG00000030793; ENSMUSG00000046432; ENSMUSG00000027381; ENSMUSG00000027322; ENSMUSG00000004446; ENSMUSG00000037405; ENSMUSG00000050335; ENSMUSG00000026029; ENSMUSG00000002603; ENSMUSG00000022150; ENSMUSG00000028864; ENSMUSG00000026875;…	226	226
3.9838e-09	4.20789e-08	GO:0043491	b	4	protein kinase B signaling	13051; 70839; 104943; 50490; 14456; 237542; 109042; 11501; 12487; 14058; 14068; 14538; 14991; 15163; 15200; 244882; 16000; 16173; 16176; 16193; 81799; 16846; 17392; 17700; 17751; 17926; 18590; 19271; 52377; 19882; 20293; 20302; 20682; 21803; 21825; 21926; 21939; 21943; 211323; 216869; 23886; 320207; 58994; 26362; 26941; 15442; 30955; 54612	ENSMUSG00000020053; ENSMUSG00000032584; ENSMUSG00000038508; ENSMUSG00000019539; ENSMUSG00000022831; ENSMUSG00000059201; ENSMUSG00000025856; ENSMUSG00000020573; ENSMUSG00000037060; ENSMUSG00000021360; ENSMUSG00000017652; ENSMUSG00000031443; ENSMUSG00000030562; ENSMUSG00000031444; ENSMUSG00000035273; ENSMUSG00000024486; ENSMUSG00000002602; ENSMUSG00000043613; ENSMUSG00000026697; ENSMUSG00000018822;…	195	195
5.21325e-09	5.46381e-08	GO:0048246	b	4	macrophage chemotaxis	56792; 71660; 74748; 75458; 12267; 12273; 12977; 14747; 16854; 17700; 17925; 19229; 19271; 20293; 20296; 20302; 21825; 63873; 64095	ENSMUSG00000000982; ENSMUSG00000025314; ENSMUSG00000050335; ENSMUSG00000004677; ENSMUSG00000040152; ENSMUSG00000026271; ENSMUSG00000014599; ENSMUSG00000059456; ENSMUSG00000042190; ENSMUSG00000053318; ENSMUSG00000049130; ENSMUSG00000009281; ENSMUSG00000026100; ENSMUSG00000035385; ENSMUSG00000029254; ENSMUSG00000054400; ENSMUSG00000035352; ENSMUSG00000014158; ENSMUSG00000040552	42	42
7.5116e-09	7.81206e-08	GO:0002228	b	4	natural killer cell mediated immunity	54725; 70450; 11891; 171285; 77777; 74732; 12721; 14991; 15040; 15170; 80782; 16173; 16174; 16643; 16846; 19368; 19369; 19370; 20400; 22324; 216869; 56554; 19419; 27007	ENSMUSG00000030707; ENSMUSG00000032202; ENSMUSG00000026068; ENSMUSG00000079685; ENSMUSG00000039232; ENSMUSG00000004266; ENSMUSG00000067212; ENSMUSG00000030165; ENSMUSG00000078452; ENSMUSG00000020399; ENSMUSG00000030149; ENSMUSG00000032076; ENSMUSG00000039217; ENSMUSG00000079298; ENSMUSG00000057948; ENSMUSG00000059201; ENSMUSG00000016206; ENSMUSG00000060216; ENSMUSG00000027347; ENSMUSG00000005696;…	65	65
8.45783e-09	8.729e-08	GO:0006809	b	4	nitric oxide biosynthetic process	21898; 13051; 77777; 11605; 11629; 12759; 24088; 14991; 15894; 16000; 16153; 16176; 16193; 16414; 16423; 17394; 19225; 19229; 19261; 19288; 19369; 21926; 21899; 58994; 27007; 13078	ENSMUSG00000055447; ENSMUSG00000031266; ENSMUSG00000032487; ENSMUSG00000024397; ENSMUSG00000005800; ENSMUSG00000016529; ENSMUSG00000027832; ENSMUSG00000037405; ENSMUSG00000079685; ENSMUSG00000031906; ENSMUSG00000022037; ENSMUSG00000024401; ENSMUSG00000039005; ENSMUSG00000020053; ENSMUSG00000051498; ENSMUSG00000030149; ENSMUSG00000027398; ENSMUSG00000024087; ENSMUSG00000000290; ENSMUSG00000059456;…	75	75
9.05049e-09	9.2699e-08	GO:1901699	b	4	cellular response to nitrogen compound	98496; 21898; 230514; 66713; 232975; 70839; 11820; 71660; 11951; 50490; 237542; 12292; 106572; 237911; 74777; 107581; 12550; 76709; 214763; 233571; 83433; 231207; 11461; 12843; 11629; 11747; 11810; 11821; 11846; 12189; 12322; 12363; 12373; 12428; 12631; 12702; 12832; 12833; 13057; 13058; 13163; 13433; 24088; 67865; 14130; 14276; 14289; 14360; 14394; 14401; 14678; 14702; 14784; 15559; 15894; 16000…	ENSMUSG00000040249; ENSMUSG00000038508; ENSMUSG00000045322; ENSMUSG00000026656; ENSMUSG00000030447; ENSMUSG00000030562; ENSMUSG00000050989; ENSMUSG00000037405; ENSMUSG00000021948; ENSMUSG00000027843; ENSMUSG00000040907; ENSMUSG00000030844; ENSMUSG00000029661; ENSMUSG00000053113; ENSMUSG00000017146; ENSMUSG00000001119; ENSMUSG00000004698; ENSMUSG00000034329; ENSMUSG00000019843; ENSMUSG00000020189;…	610	610
1.02137e-08	1.03826e-07	GO:0080135	b	4	regulation of cellular response to stress	21898; 66713; 66824; 67141; 67397; 330177; 69885; 233781; 102871; 70415; 332579; 234396; 11820; 104271; 71805; 269016; 72607; 215653; 237877; 74041; 75317; 214763; 114715; 12028; 12122; 12189; 77782; 12505; 12649; 12759; 13132; 13197; 100532; 14048; 14049; 14051; 14125; 14130; 14219; 14226; 14235; 14360; 14528; 14991; 15234; 15357; 15361; 15364; 15939; 16153; 16176; 16181; 81897; 16409; 16543; 16…	ENSMUSG00000040249; ENSMUSG00000032939; ENSMUSG00000003873; ENSMUSG00000045322; ENSMUSG00000046295; ENSMUSG00000026656; ENSMUSG00000016529; ENSMUSG00000019997; ENSMUSG00000029616; ENSMUSG00000021948; ENSMUSG00000027843; ENSMUSG00000017146; ENSMUSG00000019843; ENSMUSG00000019773; ENSMUSG00000038612; ENSMUSG00000059201; ENSMUSG00000015829; ENSMUSG00000027398; ENSMUSG00000042228; ENSMUSG00000009628;…	665	664
1.08593e-08	1.08754e-07	GO:0052696	b	4	flavonoid glucuronidation	394432; 394433; 394435; 394430; 394434; 394436; 22236; 94284	ENSMUSG00000054545; ENSMUSG00000090124; ENSMUSG00000089960; ENSMUSG00000090145; ENSMUSG00000089943; ENSMUSG00000090175; ENSMUSG00000090165; ENSMUSG00000090171	8	8
1.08593e-08	1.08754e-07	GO:0052697	b	4	xenobiotic glucuronidation	394432; 394433; 394435; 394430; 394434; 394436; 22236; 94284	ENSMUSG00000054545; ENSMUSG00000090124; ENSMUSG00000089960; ENSMUSG00000090145; ENSMUSG00000089943; ENSMUSG00000090175; ENSMUSG00000090165; ENSMUSG00000090171	8	8
1.16253e-08	1.1557e-07	GO:0030193	b	4	regulation of blood coagulation	21898; 72828; 11747; 12306; 12527; 14068; 14127; 14726; 56193; 17096; 18590; 18753; 18761; 18787; 18792; 19128; 19271; 216350; 20202; 20963; 21682; 21825; 20344; 20720; 15442; 21788	ENSMUSG00000022912; ENSMUSG00000035273; ENSMUSG00000025856; ENSMUSG00000021457; ENSMUSG00000031443; ENSMUSG00000058715; ENSMUSG00000021948; ENSMUSG00000026249; ENSMUSG00000026778; ENSMUSG00000028583; ENSMUSG00000021822; ENSMUSG00000027082; ENSMUSG00000034127; ENSMUSG00000039005; ENSMUSG00000030342; ENSMUSG00000026580; ENSMUSG00000029217; ENSMUSG00000042228; ENSMUSG00000025314; ENSMUSG00000032231;…	76	76
1.17487e-08	1.15943e-07	GO:0071417	b	4	cellular response to organonitrogen compound	98496; 21898; 230514; 66713; 232975; 70839; 11820; 71660; 11951; 50490; 237542; 12292; 106572; 237911; 74777; 107581; 12550; 76709; 233571; 83433; 231207; 11461; 12843; 11629; 11747; 11810; 11821; 11846; 12189; 12322; 12363; 12373; 12428; 12631; 12702; 12832; 12833; 13057; 13058; 13433; 24088; 14130; 14276; 14289; 14360; 14394; 14401; 14678; 14702; 14784; 15559; 15894; 16000; 16173; 16176; 16193;…	ENSMUSG00000040249; ENSMUSG00000038508; ENSMUSG00000045322; ENSMUSG00000026656; ENSMUSG00000030447; ENSMUSG00000030562; ENSMUSG00000050989; ENSMUSG00000037405; ENSMUSG00000021948; ENSMUSG00000027843; ENSMUSG00000040907; ENSMUSG00000029661; ENSMUSG00000053113; ENSMUSG00000017146; ENSMUSG00000001119; ENSMUSG00000004698; ENSMUSG00000034329; ENSMUSG00000019843; ENSMUSG00000020189; ENSMUSG00000048779;…	546	546
1.22514e-08	1.20028e-07	GO:0002429	b	4	immune response-activating cell surface receptor signaling pathway	105855; 56792; 68119; 16822; 102657; 210757; 234779; 50723; 12047; 629871; 238447; 629845; 240754; 11486; 404711; 12028; 12043; 78473; 12229; 12267; 12273; 110785; 12487; 24088; 14127; 14130; 14289; 14360; 243910; 14747; 15170; 16016; 16019; 16071; 16423; 16428; 16534; 246177; 16854; 17096; 100123473; 18019; 74039; 18751; 19260; 19264; 19271; 217303; 20737; 20963; 107321; 21682; 21838; 22038; 233…	ENSMUSG00000099974; ENSMUSG00000033721; ENSMUSG00000051998; ENSMUSG00000055447; ENSMUSG00000003873; ENSMUSG00000031264; ENSMUSG00000026656; ENSMUSG00000000732; ENSMUSG00000027544; ENSMUSG00000020437; ENSMUSG00000021457; ENSMUSG00000042190; ENSMUSG00000076695; ENSMUSG00000024696; ENSMUSG00000002699; ENSMUSG00000058715; ENSMUSG00000040751; ENSMUSG00000058099; ENSMUSG00000050335; ENSMUSG00000027843;…	332	319
1.31711e-08	1.2811e-07	GO:0032880	b	4	regulation of protein localization	98496; 21898; 54725; 230514; 66824; 67052; 230979; 67177; 67397; 56807; 67628; 232414; 69146; 102657; 104271; 11983; 170744; 171285; 14456; 12289; 17754; 55991; 74117; 56079; 23845; 238377; 94353; 192662; 74772; 12481; 140497; 12550; 76709; 76123; 83433; 240641; 11461; 11746; 11747; 11799; 11815; 12021; 12043; 56631; 12189; 77744; 12290; 12322; 12362; 12363; 12448; 12475; 12483; 12523; 12534; 126…	ENSMUSG00000040249; ENSMUSG00000022831; ENSMUSG00000022150; ENSMUSG00000016529; ENSMUSG00000029616; ENSMUSG00000021948; ENSMUSG00000045322; ENSMUSG00000027843; ENSMUSG00000036964; ENSMUSG00000022070; ENSMUSG00000017146; ENSMUSG00000015968; ENSMUSG00000004110; ENSMUSG00000026778; ENSMUSG00000019843; ENSMUSG00000028333; ENSMUSG00000027797; ENSMUSG00000074361; ENSMUSG00000030579; ENSMUSG00000030839;…	1026	1026
1.40329e-08	1.35518e-07	GO:0031032	b	4	actomyosin structure organization	16419; 16765; 68743; 68802; 233199; 50874; 268396; 71819; 72754; 50490; 12798; 11465; 11853; 11856; 12373; 13009; 13605; 14026; 14219; 14744; 16423; 17868; 17886; 17906; 17926; 17930; 18175; 18479; 18643; 18761; 19229; 20194; 21957; 21809; 21955; 22003; 22376; 22388; 22437; 24131; 320502; 59006; 59011; 26934; 93677; 30794; 228003	ENSMUSG00000055447; ENSMUSG00000013936; ENSMUSG00000031165; ENSMUSG00000021262; ENSMUSG00000036777; ENSMUSG00000004665; ENSMUSG00000019997; ENSMUSG00000030562; ENSMUSG00000022443; ENSMUSG00000068697; ENSMUSG00000021886; ENSMUSG00000031355; ENSMUSG00000018293; ENSMUSG00000023015; ENSMUSG00000026697; ENSMUSG00000027861; ENSMUSG00000031461; ENSMUSG00000061723; ENSMUSG00000002233; ENSMUSG00000064179;…	196	196
1.55988e-08	1.49571e-07	GO:0031532	b	4	actin cytoskeleton reorganization	56792; 231830; 74117; 192662; 76709; 11854; 11857; 12978; 13860; 14159; 14178; 14739; 14744; 15162; 170736; 56193; 16952; 17886; 18003; 18479; 19229; 20202; 21803; 22350; 320664; 28240; 192176; 30794; 63873; 63986; 64099	ENSMUSG00000006304; ENSMUSG00000009292; ENSMUSG00000021365; ENSMUSG00000025132; ENSMUSG00000022443; ENSMUSG00000021886; ENSMUSG00000020388; ENSMUSG00000060791; ENSMUSG00000002603; ENSMUSG00000053158; ENSMUSG00000024621; ENSMUSG00000043895; ENSMUSG00000015766; ENSMUSG00000014158; ENSMUSG00000030220; ENSMUSG00000052397; ENSMUSG00000003283; ENSMUSG00000022438; ENSMUSG00000041845; ENSMUSG00000074570;…	103	103
1.62902e-08	1.55101e-07	GO:0001944	b	4	vasculature development	13051; 54598; 67628; 239027; 68169; 100952; 68792; 109901; 71602; 72324; 72461; 12394; 94352; 108154; 108961; 11501; 12843; 11535; 11601; 11602; 114715; 11745; 12028; 12142; 12189; 12267; 12273; 12306; 12370; 12702; 12767; 12771; 12772; 12822; 12837; 13036; 13058; 13433; 13845; 14048; 14103; 14164; 14172; 14205; 14219; 14235; 14283; 14726; 14991; 15117; 15200; 15234; 15242; 15364; 15368; 15945; 1…	ENSMUSG00000033721; ENSMUSG00000040249; ENSMUSG00000038151; ENSMUSG00000027460; ENSMUSG00000003873; ENSMUSG00000027544; ENSMUSG00000025856; ENSMUSG00000016529; ENSMUSG00000019997; ENSMUSG00000061119; ENSMUSG00000032220; ENSMUSG00000022367; ENSMUSG00000029661; ENSMUSG00000042607; ENSMUSG00000057967; ENSMUSG00000053113; ENSMUSG00000017146; ENSMUSG00000028583; ENSMUSG00000021822; ENSMUSG00000023885;…	746	746
1.77183e-08	1.67518e-07	GO:0072678	b	4	T cell migration	66824; 230979; 66102; 11820; 11501; 11629; 11815; 12772; 15894; 15945; 16401; 16416; 16421; 246177; 17698; 20296; 20302; 20737; 56532; 57781; 321019; 50930	ENSMUSG00000022892; ENSMUSG00000030793; ENSMUSG00000024397; ENSMUSG00000042333; ENSMUSG00000022667; ENSMUSG00000031207; ENSMUSG00000001281; ENSMUSG00000005824; ENSMUSG00000037405; ENSMUSG00000022221; ENSMUSG00000027009; ENSMUSG00000018920; ENSMUSG00000049103; ENSMUSG00000051212; ENSMUSG00000020437; ENSMUSG00000034855; ENSMUSG00000020689; ENSMUSG00000000982; ENSMUSG00000035385; ENSMUSG00000025473;…	59	58
1.94631e-08	1.82737e-07	GO:0000902	b	4	cell morphogenesis	105855; 54725; 66713; 67263; 264134; 16765; 11308; 231830; 68802; 70415; 70450; 11820; 71409; 104252; 11951; 399558; 277360; 72729; 241568; 270120; 50490; 73710; 17754; 74117; 74194; 74202; 192662; 74734; 140570; 12550; 108101; 76709; 67220; 240641; 76884; 109711; 11461; 11501; 11658; 11853; 11854; 12043; 12317; 12322; 54712; 12331; 12399; 12505; 12631; 12704; 12721; 12759; 12767; 12774; 12799; 1…	ENSMUSG00000040249; ENSMUSG00000021665; ENSMUSG00000034226; ENSMUSG00000018965; ENSMUSG00000048251; ENSMUSG00000029516; ENSMUSG00000026532; ENSMUSG00000015829; ENSMUSG00000021262; ENSMUSG00000074785; ENSMUSG00000030447; ENSMUSG00000029204; ENSMUSG00000001281; ENSMUSG00000030562; ENSMUSG00000037405; ENSMUSG00000028613; ENSMUSG00000026697; ENSMUSG00000004266; ENSMUSG00000051650; ENSMUSG00000022367;…	1072	1072
2.00875e-08	1.87298e-07	GO:0051983	b	4	regulation of chromosome segregation	229841; 67052; 67141; 67177; 69716; 70385; 268697; 214901; 11799; 12235; 12704; 13605; 67849; 14156; 17345; 18005; 68549; 18817; 51944; 20877; 73804; 54141; 22137; 56150; 23834; 21335; 58186; 12236; 26934; 59126; 83560	ENSMUSG00000040084; ENSMUSG00000023015; ENSMUSG00000031004; ENSMUSG00000021569; ENSMUSG00000024056; ENSMUSG00000002055; ENSMUSG00000045328; ENSMUSG00000019214; ENSMUSG00000030254; ENSMUSG00000024791; ENSMUSG00000010342; ENSMUSG00000041431; ENSMUSG00000028678; ENSMUSG00000030867; ENSMUSG00000027331; ENSMUSG00000027379; ENSMUSG00000020897; ENSMUSG00000038379; ENSMUSG00000024742; ENSMUSG00000069910;…	104	104
2.15301e-08	1.99375e-07	GO:0046209	b	4	nitric oxide metabolic process	21898; 13051; 77777; 11605; 11629; 12759; 24088; 14991; 15894; 16000; 16153; 16176; 16193; 16414; 16423; 17394; 19225; 19229; 19261; 19288; 19369; 21926; 21899; 58994; 27007; 13078	ENSMUSG00000055447; ENSMUSG00000031266; ENSMUSG00000032487; ENSMUSG00000024397; ENSMUSG00000005800; ENSMUSG00000016529; ENSMUSG00000027832; ENSMUSG00000037405; ENSMUSG00000079685; ENSMUSG00000031906; ENSMUSG00000022037; ENSMUSG00000024401; ENSMUSG00000039005; ENSMUSG00000020053; ENSMUSG00000051498; ENSMUSG00000030149; ENSMUSG00000027398; ENSMUSG00000024087; ENSMUSG00000000290; ENSMUSG00000059456;…	78	78
2.32332e-08	2.13682e-07	GO:0098581	b	4	detection of external biotic stimulus	21898; 17951; 268973; 83433; 24088; 16410; 16803; 17087; 17948; 17952; 21897; 21899; 257632	ENSMUSG00000078942; ENSMUSG00000051498; ENSMUSG00000025779; ENSMUSG00000078945; ENSMUSG00000039193; ENSMUSG00000027995; ENSMUSG00000044827; ENSMUSG00000016024; ENSMUSG00000071203; ENSMUSG00000023992; ENSMUSG00000055994; ENSMUSG00000027087; ENSMUSG00000039005	22	22
3.17022e-08	2.89604e-07	GO:0031343	b	4	positive regulation of cell killing	54725; 56792; 12125; 77777; 11846; 12010; 110557; 12774; 14825; 14964; 14991; 15015; 15018; 15024; 15040; 16174; 16409; 18439; 19264; 19368; 19369; 19370; 20296; 20400; 22177; 22324; 56554; 19419; 27007	ENSMUSG00000035929; ENSMUSG00000067212; ENSMUSG00000079491; ENSMUSG00000027381; ENSMUSG00000034116; ENSMUSG00000032076; ENSMUSG00000079685; ENSMUSG00000026068; ENSMUSG00000026395; ENSMUSG00000029468; ENSMUSG00000030786; ENSMUSG00000030149; ENSMUSG00000030579; ENSMUSG00000073409; ENSMUSG00000029254; ENSMUSG00000019987; ENSMUSG00000073411; ENSMUSG00000060802; ENSMUSG00000035385; ENSMUSG00000005696;…	95	95
3.41717e-08	3.10068e-07	GO:0080090	b	4	regulation of primary metabolic process	108167344; 98496; 225872; 21898; 21917; 229841; 105855; 100041194; 623121; 66107; 98878; 54722; 66197; 66222; 66395; 100041677; 13051; 66578; 66713; 100041979; 66824; 66889; 230979; 56792; 67141; 67177; 67397; 100182; 67557; 67628; 67742; 231655; 76843; 11308; 104156; 330177; 68040; 16822; 100952; 84112; 77011; 100044193; 100503000; 233060; 69263; 626391; 235505; 69550; 109901; 69585; 69885; 1026…	ENSMUSG00000033721; ENSMUSG00000046591; ENSMUSG00000003873; ENSMUSG00000053192; ENSMUSG00000030117; ENSMUSG00000042190; ENSMUSG00000027381; ENSMUSG00000030447; ENSMUSG00000016529; ENSMUSG00000030562; ENSMUSG00000030560; ENSMUSG00000037405; ENSMUSG00000045322; ENSMUSG00000005054; ENSMUSG00000026796; ENSMUSG00000050315; ENSMUSG00000031907; ENSMUSG00000017146; ENSMUSG00000040479; ENSMUSG00000004698;…	5734	5729
3.82211e-08	3.445e-07	GO:0044839	b	4	cell cycle G2/M phase transition	67141; 76843; 330177; 77011; 11820; 268697; 269582; 237877; 108000; 11799; 12189; 12314; 12428; 12443; 12532; 12534; 12579; 12649; 12704; 14199; 14235; 15364; 16906; 17193; 18392; 18647; 18761; 18767; 18817; 67121; 19363; 20877; 66371; 23834; 381293; 27401	ENSMUSG00000046591; ENSMUSG00000023092; ENSMUSG00000029516; ENSMUSG00000059060; ENSMUSG00000056758; ENSMUSG00000022892; ENSMUSG00000036438; ENSMUSG00000041431; ENSMUSG00000032113; ENSMUSG00000019942; ENSMUSG00000054115; ENSMUSG00000028587; ENSMUSG00000030867; ENSMUSG00000070348; ENSMUSG00000026778; ENSMUSG00000017146; ENSMUSG00000020897; ENSMUSG00000024590; ENSMUSG00000019773; ENSMUSG00000026779;…	135	135
3.88825e-08	3.4814e-07	GO:0050818	b	4	regulation of coagulation	21898; 72828; 11747; 12306; 12527; 14068; 14127; 14726; 56193; 17096; 18590; 18753; 18761; 18787; 18792; 19128; 19271; 216350; 20202; 20963; 21682; 21825; 20344; 20720; 15442; 21788	ENSMUSG00000022912; ENSMUSG00000035273; ENSMUSG00000025856; ENSMUSG00000021457; ENSMUSG00000031443; ENSMUSG00000058715; ENSMUSG00000021948; ENSMUSG00000026249; ENSMUSG00000026778; ENSMUSG00000028583; ENSMUSG00000021822; ENSMUSG00000027082; ENSMUSG00000034127; ENSMUSG00000039005; ENSMUSG00000030342; ENSMUSG00000026580; ENSMUSG00000029217; ENSMUSG00000042228; ENSMUSG00000025314; ENSMUSG00000032231;…	80	80
3.9878e-08	3.54704e-07	GO:0060402	b	4	calcium ion transport into cytosol	68460; 69810; 234779; 71912; 433294; 74777; 233571; 72828; 171166; 76757; 12028; 12043; 12314; 12373; 12504; 12721; 12774; 13057; 14103; 14226; 14360; 15170; 15559; 15945; 16410; 16416; 68279; 17096; 17364; 18439; 19229; 19264; 19414; 20191; 20302; 21803; 21838; 23832; 20541; 233979; 28240	ENSMUSG00000020635; ENSMUSG00000003873; ENSMUSG00000009292; ENSMUSG00000030523; ENSMUSG00000036438; ENSMUSG00000050989; ENSMUSG00000030707; ENSMUSG00000033044; ENSMUSG00000004266; ENSMUSG00000002603; ENSMUSG00000032011; ENSMUSG00000027861; ENSMUSG00000047343; ENSMUSG00000011008; ENSMUSG00000060509; ENSMUSG00000054640; ENSMUSG00000019843; ENSMUSG00000026228; ENSMUSG00000026395; ENSMUSG00000048779;…	165	165
4.06342e-08	3.57926e-07	GO:0031663	b	4	lipopolysaccharide-mediated signaling pathway	21898; 83433; 12475; 12511; 12523; 16173; 16176; 16365; 16803; 17079; 17084; 17087; 17096; 19204; 19260; 20293; 20302; 21803; 21926; 21929	ENSMUSG00000024401; ENSMUSG00000000982; ENSMUSG00000056529; ENSMUSG00000025779; ENSMUSG00000039005; ENSMUSG00000027843; ENSMUSG00000051439; ENSMUSG00000021624; ENSMUSG00000019850; ENSMUSG00000016024; ENSMUSG00000039217; ENSMUSG00000022126; ENSMUSG00000027398; ENSMUSG00000035352; ENSMUSG00000023992; ENSMUSG00000021423; ENSMUSG00000038147; ENSMUSG00000042228; ENSMUSG00000002603; ENSMUSG00000024670	51	51
4.07697e-08	3.57926e-07	GO:0065003	b	4	protein-containing complex assembly	21898; 229841; 105855; 98878; 66311; 66395; 66578; 66713; 66824; 67141; 67177; 67516; 67628; 16765; 231830; 100952; 68612; 77011; 69146; 233199; 66211; 69608; 50874; 66336; 215114; 70450; 70645; 70839; 11820; 104252; 11951; 268396; 71805; 11983; 277360; 268697; 268857; 170643; 268973; 12125; 55991; 66929; 74015; 74117; 74202; 107435; 110749; 107581; 319188; 12550; 108101; 76709; 666048; 109323; 1…	ENSMUSG00000101972; ENSMUSG00000058385; ENSMUSG00000032939; ENSMUSG00000046591; ENSMUSG00000003873; ENSMUSG00000022831; ENSMUSG00000026532; ENSMUSG00000045328; ENSMUSG00000036672; ENSMUSG00000058624; ENSMUSG00000021262; ENSMUSG00000027460; ENSMUSG00000029126; ENSMUSG00000030447; ENSMUSG00000042349; ENSMUSG00000105827; ENSMUSG00000025429; ENSMUSG00000031461; ENSMUSG00000009731; ENSMUSG00000025630;…	1785	1783
4.16853e-08	3.63603e-07	GO:0060255	b	4	regulation of macromolecule metabolic process	108167344; 98496; 225872; 21898; 21917; 229841; 105855; 100041194; 623121; 66107; 98878; 54722; 66197; 66222; 66395; 100041677; 13051; 66578; 66713; 100041979; 66824; 66889; 230979; 56792; 67141; 67177; 67276; 67397; 100182; 67557; 67628; 67742; 231655; 76843; 11308; 104156; 330177; 68040; 16822; 100952; 232174; 84112; 77011; 100044193; 100503000; 233060; 69263; 626391; 235505; 69550; 109901; 695…	ENSMUSG00000046591; ENSMUSG00000003873; ENSMUSG00000053192; ENSMUSG00000030117; ENSMUSG00000042190; ENSMUSG00000027381; ENSMUSG00000050410; ENSMUSG00000030447; ENSMUSG00000016529; ENSMUSG00000030562; ENSMUSG00000030560; ENSMUSG00000037405; ENSMUSG00000045322; ENSMUSG00000005054; ENSMUSG00000026796; ENSMUSG00000050315; ENSMUSG00000031907; ENSMUSG00000017146; ENSMUSG00000004698; ENSMUSG00000019773;…	5816	5811
4.84006e-08	4.19472e-07	GO:0072358	b	4	cardiovascular system development	13051; 54598; 67628; 239027; 68169; 100952; 68792; 109901; 71602; 72324; 72461; 12394; 94352; 108154; 108961; 11501; 12843; 11535; 11601; 11602; 114715; 11745; 12028; 12142; 12189; 12267; 12273; 12306; 12370; 12702; 12767; 12771; 12772; 12822; 12837; 13036; 13058; 13433; 13845; 14048; 14103; 14164; 14172; 14205; 14219; 14235; 14283; 14726; 14991; 15117; 15200; 15234; 15242; 15364; 15368; 15945; 1…	ENSMUSG00000033721; ENSMUSG00000040249; ENSMUSG00000038151; ENSMUSG00000027460; ENSMUSG00000003873; ENSMUSG00000027544; ENSMUSG00000025856; ENSMUSG00000016529; ENSMUSG00000019997; ENSMUSG00000061119; ENSMUSG00000032220; ENSMUSG00000022367; ENSMUSG00000029661; ENSMUSG00000042607; ENSMUSG00000057967; ENSMUSG00000053113; ENSMUSG00000017146; ENSMUSG00000028583; ENSMUSG00000021822; ENSMUSG00000023885;…	760	760
4.9469e-08	4.2345e-07	GO:1904407	b	4	positive regulation of nitric oxide metabolic process	21898; 77777; 11629; 12759; 24088; 14991; 15894; 16176; 16193; 16414; 17394; 19225; 19229; 19288; 19369; 21926; 21899; 58994; 27007	ENSMUSG00000024401; ENSMUSG00000037405; ENSMUSG00000079685; ENSMUSG00000000290; ENSMUSG00000032487; ENSMUSG00000059456; ENSMUSG00000027995; ENSMUSG00000051498; ENSMUSG00000078452; ENSMUSG00000030149; ENSMUSG00000024397; ENSMUSG00000005800; ENSMUSG00000025746; ENSMUSG00000027398; ENSMUSG00000022037; ENSMUSG00000016206; ENSMUSG00000031906; ENSMUSG00000027832; ENSMUSG00000039005	47	47
4.95489e-08	4.2345e-07	GO:0006974	b	4	cellular response to DNA damage stimulus	66713; 66824; 66940; 67141; 67196; 76843; 330177; 77011; 101831; 69716; 69745; 69885; 233826; 70024; 70099; 102871; 234258; 234396; 70603; 104271; 104418; 268465; 71988; 12044; 12047; 72612; 12125; 269582; 208836; 237877; 74041; 237911; 110749; 67967; 75317; 272551; 214763; 68026; 208084; 114715; 110033; 329679; 12021; 12028; 12043; 12045; 12122; 12189; 77782; 12443; 12505; 12534; 12649; 12759; 1…	ENSMUSG00000099974; ENSMUSG00000033721; ENSMUSG00000046591; ENSMUSG00000003873; ENSMUSG00000046295; ENSMUSG00000027544; ENSMUSG00000027381; ENSMUSG00000006360; ENSMUSG00000021948; ENSMUSG00000070348; ENSMUSG00000006678; ENSMUSG00000017146; ENSMUSG00000040479; ENSMUSG00000089929; ENSMUSG00000034329; ENSMUSG00000039055; ENSMUSG00000019773; ENSMUSG00000021569; ENSMUSG00000038612; ENSMUSG00000041064;…	738	737
4.97992e-08	4.2345e-07	GO:0032490	b	4	detection of molecule of bacterial origin	21898; 83433; 24088; 16410; 16803; 17087; 21897; 21899; 257632	ENSMUSG00000051498; ENSMUSG00000025779; ENSMUSG00000027995; ENSMUSG00000044827; ENSMUSG00000016024; ENSMUSG00000023992; ENSMUSG00000055994; ENSMUSG00000027087; ENSMUSG00000039005	11	11
5.06504e-08	4.27996e-07	GO:0071824	b	4	protein-DNA complex subunit organization	229841; 66311; 66578; 67177; 67628; 66336; 70645; 66929; 107435; 110749; 319188; 13163; 18602; 14957; 80838; 319159; 319160; 17216; 17869; 50709; 19361; 20682; 53605; 22778; 56702; 319148; 319149; 319150; 319153; 319154; 319157; 319158; 319161; 319162; 319178; 319180; 319181; 319183; 319184; 319185; 319187; 319189; 320394; 15201; 102920; 26886; 97908; 260423; 326619; 326620; 27221; 360198	ENSMUSG00000031262; ENSMUSG00000058385; ENSMUSG00000067455; ENSMUSG00000060093; ENSMUSG00000058773; ENSMUSG00000045328; ENSMUSG00000036672; ENSMUSG00000058799; ENSMUSG00000002835; ENSMUSG00000018654; ENSMUSG00000074403; ENSMUSG00000062727; ENSMUSG00000052565; ENSMUSG00000002870; ENSMUSG00000069266; ENSMUSG00000069267; ENSMUSG00000049539; ENSMUSG00000022346; ENSMUSG00000072980; ENSMUSG00000025330;…	236	236
5.48749e-08	4.60813e-07	GO:0000281	b	4	mitotic cytokinesis	67177; 16765; 68743; 71819; 71877; 80986; 108907; 240641; 11799; 11853; 12631; 12704; 13163; 13605; 16571; 74107; 18817; 19348; 216049; 66371; 26934; 28105; 207175; 16319	ENSMUSG00000029516; ENSMUSG00000027306; ENSMUSG00000024795; ENSMUSG00000036777; ENSMUSG00000037725; ENSMUSG00000003779; ENSMUSG00000033949; ENSMUSG00000023015; ENSMUSG00000034311; ENSMUSG00000030867; ENSMUSG00000002233; ENSMUSG00000024660; ENSMUSG00000024989; ENSMUSG00000027699; ENSMUSG00000037855; ENSMUSG00000056201; ENSMUSG00000041809; ENSMUSG00000045031; ENSMUSG00000032254; ENSMUSG00000017716;…	71	71
5.80393e-08	4.84378e-07	GO:0010810	b	4	regulation of cell-substrate adhesion	67896; 68169; 100952; 70450; 277360; 107581; 76709; 11601; 11687; 11815; 11854; 11856; 12043; 78473; 12182; 12317; 12631; 12837; 12977; 13132; 14115; 14260; 14538; 14726; 15117; 29875; 16402; 16416; 16971; 246707; 17381; 17387; 83436; 17926; 18003; 50918; 18787; 18792; 19229; 19271; 19354; 20194; 20750; 21825; 21838; 320664; 23790; 192176	ENSMUSG00000040249; ENSMUSG00000006304; ENSMUSG00000022367; ENSMUSG00000000957; ENSMUSG00000024053; ENSMUSG00000029304; ENSMUSG00000021365; ENSMUSG00000021360; ENSMUSG00000022665; ENSMUSG00000031465; ENSMUSG00000018924; ENSMUSG00000031355; ENSMUSG00000040690; ENSMUSG00000068566; ENSMUSG00000022150; ENSMUSG00000032011; ENSMUSG00000068196; ENSMUSG00000028583; ENSMUSG00000057948; ENSMUSG00000003814;…	211	211
6.23292e-08	5.16988e-07	GO:0051091	b	4	positive regulation of DNA-binding transcription factor activity	21898; 13051; 66824; 11820; 268973; 170799; 12289; 94353; 74735; 11501; 11745; 12322; 12523; 12759; 13009; 24088; 14130; 14283; 15163; 15364; 15894; 16153; 16173; 16174; 16176; 16180; 16193; 81897; 16414; 226421; 16800; 16975; 16978; 74039; 18751; 18761; 20698; 21803; 21926; 21934; 21939; 21943; 22029; 22033; 216799; 383619; 56532; 21899; 223513; 257632; 108723; 227541; 245527	ENSMUSG00000022831; ENSMUSG00000026656; ENSMUSG00000039145; ENSMUSG00000016529; ENSMUSG00000030793; ENSMUSG00000056758; ENSMUSG00000052688; ENSMUSG00000022892; ENSMUSG00000017652; ENSMUSG00000024912; ENSMUSG00000037405; ENSMUSG00000022221; ENSMUSG00000045322; ENSMUSG00000028613; ENSMUSG00000029484; ENSMUSG00000002603; ENSMUSG00000055994; ENSMUSG00000022015; ENSMUSG00000026068; ENSMUSG00000042895;…	244	244
7.23e-08	5.96034e-07	GO:0007249	b	4	I-kappaB kinase/NF-kappaB signaling	21898; 13051; 66824; 332579; 71481; 268857; 170743; 170744; 74734; 12229; 12362; 12370; 12504; 24088; 14103; 14360; 243910; 15559; 16176; 16181; 81897; 414084; 83490; 18751; 19261; 19696; 20198; 20210; 21926; 21929; 21939; 21943; 22033; 56489; 56532; 56620; 56722; 24108; 211550; 21899; 66949; 257632; 192176; 225471; 108723; 245527; 212937	ENSMUSG00000031328; ENSMUSG00000031264; ENSMUSG00000026928; ENSMUSG00000056130; ENSMUSG00000030793; ENSMUSG00000000817; ENSMUSG00000025017; ENSMUSG00000017652; ENSMUSG00000029204; ENSMUSG00000045322; ENSMUSG00000022500; ENSMUSG00000049871; ENSMUSG00000022221; ENSMUSG00000028028; ENSMUSG00000055994; ENSMUSG00000001020; ENSMUSG00000042349; ENSMUSG00000022015; ENSMUSG00000040026; ENSMUSG00000024401;…	206	206
7.67255e-08	6.28684e-07	GO:0042136	b	4	neurotransmitter biosynthetic process	21898; 13051; 231871; 77777; 11605; 11629; 12759; 24088; 14528; 14991; 15894; 16000; 16153; 16176; 16193; 16414; 16423; 17394; 19225; 19229; 19261; 19288; 19369; 216343; 21926; 21899; 58994; 27007; 63993; 13078	ENSMUSG00000055447; ENSMUSG00000031266; ENSMUSG00000037580; ENSMUSG00000032487; ENSMUSG00000039206; ENSMUSG00000024397; ENSMUSG00000005800; ENSMUSG00000016529; ENSMUSG00000023945; ENSMUSG00000027832; ENSMUSG00000037405; ENSMUSG00000079685; ENSMUSG00000031906; ENSMUSG00000022037; ENSMUSG00000024401; ENSMUSG00000039005; ENSMUSG00000020053; ENSMUSG00000051498; ENSMUSG00000030149; ENSMUSG00000027398;…	104	104
7.87527e-08	6.41407e-07	GO:0072359	b	4	circulatory system development	13051; 54598; 67628; 239027; 68169; 100952; 68792; 233199; 140781; 109901; 71602; 268396; 399558; 268697; 72324; 241431; 72461; 50490; 12394; 94352; 108154; 108961; 67451; 11492; 11501; 12843; 11535; 11601; 11602; 114715; 11745; 12028; 12142; 12189; 12267; 12273; 12306; 12317; 12370; 12534; 12702; 12767; 12771; 12772; 12822; 12837; 13003; 13009; 13036; 13058; 13433; 13813; 13845; 14048; 14103; 14…	ENSMUSG00000033721; ENSMUSG00000040249; ENSMUSG00000038151; ENSMUSG00000027460; ENSMUSG00000013936; ENSMUSG00000003873; ENSMUSG00000028063; ENSMUSG00000027544; ENSMUSG00000031486; ENSMUSG00000025856; ENSMUSG00000035296; ENSMUSG00000016529; ENSMUSG00000031465; ENSMUSG00000030562; ENSMUSG00000031461; ENSMUSG00000097328; ENSMUSG00000035273; ENSMUSG00000061119; ENSMUSG00000032220; ENSMUSG00000022367;…	1143	1143
9.10034e-08	7.36746e-07	GO:0060759	b	4	regulation of response to cytokine stimulus	21898; 66824; 56792; 14456; 434341; 74186; 83433; 11846; 12362; 12363; 12484; 12977; 24088; 16177; 16181; 16193; 16196; 246746; 17381; 18600; 19264; 20698; 20963; 22036; 547253; 56045; 56489; 58203; 26362; 225471; 54123; 23939	ENSMUSG00000032586; ENSMUSG00000074151; ENSMUSG00000026676; ENSMUSG00000040329; ENSMUSG00000056130; ENSMUSG00000030793; ENSMUSG00000021457; ENSMUSG00000047798; ENSMUSG00000002602; ENSMUSG00000034422; ENSMUSG00000042349; ENSMUSG00000026395; ENSMUSG00000027514; ENSMUSG00000033538; ENSMUSG00000029254; ENSMUSG00000031451; ENSMUSG00000019987; ENSMUSG00000061878; ENSMUSG00000001034; ENSMUSG00000026981;…	116	116
9.59115e-08	7.67747e-07	GO:0048878	b	4	chemical homeostasis	13051; 66815; 16765; 67972; 232174; 84112; 68460; 331004; 232975; 69178; 69585; 69810; 11820; 234779; 110895; 71877; 71912; 72461; 433294; 236727; 236900; 270160; 50490; 14456; 12289; 238377; 94353; 74748; 74772; 74777; 12550; 233571; 76459; 72828; 15203; 207777; 171166; 76757; 67451; 11535; 11733; 11747; 11799; 11829; 11928; 12010; 12028; 12043; 242341; 12267; 12273; 12290; 12306; 12314; 12373; …	ENSMUSG00000040249; ENSMUSG00000021665; ENSMUSG00000003873; ENSMUSG00000053192; ENSMUSG00000042190; ENSMUSG00000047945; ENSMUSG00000036438; ENSMUSG00000030562; ENSMUSG00000050989; ENSMUSG00000037405; ENSMUSG00000050708; ENSMUSG00000024270; ENSMUSG00000022367; ENSMUSG00000047343; ENSMUSG00000031906; ENSMUSG00000015968; ENSMUSG00000004110; ENSMUSG00000054640; ENSMUSG00000035232; ENSMUSG00000063142;…	1212	1212
9.59684e-08	7.67747e-07	GO:0048872	b	4	homeostasis of number of cells	105855; 234396; 104271; 11983; 12044; 215653; 12125; 74131; 75974; 76044; 11486; 11733; 12010; 12028; 12043; 12442; 12484; 12505; 12721; 12772; 12977; 13423; 14127; 14130; 14255; 15163; 15368; 16173; 16193; 16196; 16197; 16323; 16331; 16409; 210293; 16658; 16889; 16909; 16952; 17096; 17189; 18439; 18707; 18733; 20296; 20311; 20682; 20739; 21803; 21929; 22778; 56532; 20375; 238875; 57916; 58801; 3…	ENSMUSG00000003873; ENSMUSG00000022831; ENSMUSG00000002603; ENSMUSG00000046295; ENSMUSG00000026656; ENSMUSG00000031101; ENSMUSG00000024521; ENSMUSG00000038608; ENSMUSG00000046006; ENSMUSG00000027381; ENSMUSG00000058715; ENSMUSG00000010142; ENSMUSG00000024781; ENSMUSG00000030707; ENSMUSG00000022221; ENSMUSG00000054428; ENSMUSG00000026288; ENSMUSG00000029371; ENSMUSG00000002111; ENSMUSG00000026532;…	310	308
9.82495e-08	7.81373e-07	GO:0007264	b	4	small GTPase mediated signal transduction	229541; 230098; 16765; 67844; 232201; 233046; 71085; 11891; 104252; 104418; 277360; 72318; 72729; 72754; 73341; 94176; 270160; 106572; 74012; 74194; 192662; 74734; 140580; 75974; 76123; 404710; 12843; 11629; 109934; 11853; 11854; 11857; 12428; 12977; 78826; 13433; 13448; 13449; 13605; 13860; 14235; 14726; 14744; 14784; 29815; 15368; 212307; 215632; 16000; 16476; 210293; 226421; 16800; 213438; 179…	ENSMUSG00000033721; ENSMUSG00000089809; ENSMUSG00000030447; ENSMUSG00000029204; ENSMUSG00000017631; ENSMUSG00000018008; ENSMUSG00000024277; ENSMUSG00000029661; ENSMUSG00000029923; ENSMUSG00000040479; ENSMUSG00000017144; ENSMUSG00000052142; ENSMUSG00000052298; ENSMUSG00000004677; ENSMUSG00000040964; ENSMUSG00000068335; ENSMUSG00000027715; ENSMUSG00000031504; ENSMUSG00000014599; ENSMUSG00000028832;…	502	502
1.00795e-07	7.96925e-07	GO:0002548	b	4	monocyte chemotaxis	74748; 11629; 12768; 12772; 14289; 15945; 16854; 16952; 17096; 17925; 18787; 19141; 19277; 20307; 20293; 20296; 20302; 20303; 20305; 20306; 20308; 21943	ENSMUSG00000053318; ENSMUSG00000024397; ENSMUSG00000019122; ENSMUSG00000050335; ENSMUSG00000022015; ENSMUSG00000018927; ENSMUSG00000049103; ENSMUSG00000035352; ENSMUSG00000035373; ENSMUSG00000030223; ENSMUSG00000025804; ENSMUSG00000021190; ENSMUSG00000004677; ENSMUSG00000034855; ENSMUSG00000042228; ENSMUSG00000009185; ENSMUSG00000000982; ENSMUSG00000052270; ENSMUSG00000035385; ENSMUSG00000037411;…	63	63
1.06743e-07	8.37247e-07	GO:0019932	b	4	second-messenger-mediated signaling	13051; 54598; 68169; 100504518; 70839; 71912; 12289; 74777; 214763; 233571; 83433; 76469; 76757; 11486; 240888; 11513; 11535; 11541; 12182; 12314; 12373; 12483; 12484; 12504; 12767; 12768; 12771; 12772; 12774; 13733; 14125; 14200; 14226; 14289; 14678; 14702; 14744; 14747; 14913; 15559; 15945; 16000; 16408; 17200; 18019; 215798; 19220; 19222; 19229; 19264; 19271; 52614; 20191; 20302; 20303; 53322;…	ENSMUSG00000024401; ENSMUSG00000020635; ENSMUSG00000032915; ENSMUSG00000045569; ENSMUSG00000027544; ENSMUSG00000030790; ENSMUSG00000009292; ENSMUSG00000021457; ENSMUSG00000042190; ENSMUSG00000030659; ENSMUSG00000023274; ENSMUSG00000045382; ENSMUSG00000026395; ENSMUSG00000036438; ENSMUSG00000040751; ENSMUSG00000018930; ENSMUSG00000048677; ENSMUSG00000018500; ENSMUSG00000050989; ENSMUSG00000048521;…	444	444
1.07133e-07	8.37247e-07	GO:0006811	b	4	ion transport	50934; 229933; 66395; 54598; 66815; 240638; 67972; 68460; 331004; 232975; 233246; 69810; 70357; 70839; 234779; 110895; 11951; 71912; 104681; 11987; 72054; 433294; 236727; 433470; 269717; 14456; 237542; 12289; 12292; 55991; 74096; 74152; 74513; 74772; 74777; 50799; 110880; 72691; 233571; 76408; 72828; 15203; 171166; 76757; 78339; 11486; 11733; 11745; 11747; 11846; 11928; 11982; 12010; 12028; 12043…	ENSMUSG00000059498; ENSMUSG00000003873; ENSMUSG00000031264; ENSMUSG00000048677; ENSMUSG00000027861; ENSMUSG00000020865; ENSMUSG00000019997; ENSMUSG00000036438; ENSMUSG00000025324; ENSMUSG00000009731; ENSMUSG00000050989; ENSMUSG00000037405; ENSMUSG00000021948; ENSMUSG00000003484; ENSMUSG00000045322; ENSMUSG00000027843; ENSMUSG00000040907; ENSMUSG00000032548; ENSMUSG00000024270; ENSMUSG00000001986;…	1641	1641
1.50618e-07	1.17032e-06	GO:1902850	b	4	microtubule cytoskeleton organization involved in mitosis	229841; 66442; 67052; 16765; 70385; 71819; 71877; 268697; 72119; 73420; 76123; 108907; 11799; 77744; 15511; 16551; 16571; 16800; 18005; 18817; 66977; 100502766; 20460; 20620; 20877; 20878; 66371; 56742; 21335; 107995; 26934; 192176; 193740; 100040531	ENSMUSG00000024056; ENSMUSG00000027469; ENSMUSG00000045328; ENSMUSG00000017716; ENSMUSG00000028718; ENSMUSG00000030867; ENSMUSG00000041431; ENSMUSG00000090877; ENSMUSG00000023015; ENSMUSG00000034311; ENSMUSG00000028059; ENSMUSG00000022070; ENSMUSG00000020897; ENSMUSG00000006398; ENSMUSG00000069910; ENSMUSG00000027883; ENSMUSG00000021701; ENSMUSG00000028832; ENSMUSG00000068744; ENSMUSG00000041809;…	130	130
1.53838e-07	1.18851e-06	GO:0007052	b	4	mitotic spindle organization	229841; 66442; 67052; 16765; 71819; 71877; 268697; 72119; 73420; 76123; 11799; 77744; 15511; 16551; 16571; 18005; 18817; 66977; 100502766; 20460; 20620; 20877; 20878; 66371; 56742; 21335; 107995; 26934; 192176; 193740	ENSMUSG00000024056; ENSMUSG00000027469; ENSMUSG00000045328; ENSMUSG00000028718; ENSMUSG00000006398; ENSMUSG00000041431; ENSMUSG00000090877; ENSMUSG00000023015; ENSMUSG00000034311; ENSMUSG00000030867; ENSMUSG00000022070; ENSMUSG00000020897; ENSMUSG00000027883; ENSMUSG00000021701; ENSMUSG00000028832; ENSMUSG00000068744; ENSMUSG00000041809; ENSMUSG00000037313; ENSMUSG00000091971; ENSMUSG00000026683;…	107	107
2.70514e-07	2.07804e-06	GO:0030198	b	4	extracellular matrix organization	67896; 68169; 100952; 69700; 234356; 11820; 71602; 268396; 399558; 237360; 14456; 94352; 107581; 56429; 12843; 53867; 12306; 12816; 12819; 12822; 12823; 12832; 12837; 13040; 14086; 14115; 14219; 14726; 15116; 15117; 16416; 16782; 16854; 16948; 16950; 17386; 18826; 19288; 53381; 20682; 21803; 21810; 21926; 21938; 21960; 216725; 56401; 26432; 26427; 234407; 67573; 13078	ENSMUSG00000024401; ENSMUSG00000022892; ENSMUSG00000025289; ENSMUSG00000035493; ENSMUSG00000021998; ENSMUSG00000022665; ENSMUSG00000019997; ENSMUSG00000034807; ENSMUSG00000028641; ENSMUSG00000027832; ENSMUSG00000026479; ENSMUSG00000036545; ENSMUSG00000050335; ENSMUSG00000026574; ENSMUSG00000040690; ENSMUSG00000000693; ENSMUSG00000002603; ENSMUSG00000027230; ENSMUSG00000032220; ENSMUSG00000022367;…	248	248
4.22845e-07	3.22987e-06	GO:0034446	b	4	substrate adhesion-dependent cell spreading	231830; 70450; 277360; 108101; 76709; 12317; 13132; 13845; 14726; 15117; 170736; 16401; 16410; 16416; 16421; 17926; 18003; 50918; 20194; 23828; 320664; 23790; 26362; 381293; 192176; 64099	ENSMUSG00000006304; ENSMUSG00000022150; ENSMUSG00000021365; ENSMUSG00000001281; ENSMUSG00000026697; ENSMUSG00000027009; ENSMUSG00000068566; ENSMUSG00000022367; ENSMUSG00000041498; ENSMUSG00000028583; ENSMUSG00000057948; ENSMUSG00000003814; ENSMUSG00000027087; ENSMUSG00000039621; ENSMUSG00000004530; ENSMUSG00000022438; ENSMUSG00000074570; ENSMUSG00000005958; ENSMUSG00000024965; ENSMUSG00000020689;…	89	89
4.27145e-07	3.24438e-06	GO:0043303	b	4	mast cell degranulation	70450; 11541; 12229; 12523; 14125; 14127; 14159; 14191; 15368; 16165; 16190; 17096; 19354; 217303; 20963; 380732; 56743; 19419	ENSMUSG00000031289; ENSMUSG00000040751; ENSMUSG00000031264; ENSMUSG00000040528; ENSMUSG00000033220; ENSMUSG00000005413; ENSMUSG00000053158; ENSMUSG00000028874; ENSMUSG00000021457; ENSMUSG00000027347; ENSMUSG00000030748; ENSMUSG00000005339; ENSMUSG00000057948; ENSMUSG00000058715; ENSMUSG00000038147; ENSMUSG00000042228; ENSMUSG00000034652; ENSMUSG00000018500	48	48
5.05031e-07	3.81453e-06	GO:0043901	b	4	negative regulation of multi-organism process	66141; 231655; 69550; 246730; 171285; 107373; 74735; 11486; 11857; 12306; 12317; 23962; 24088; 15364; 15900; 16000; 16153; 16365; 16410; 16476; 16803; 246727; 80861; 17858; 19288; 20302; 20303; 53381; 21857; 21926; 21929; 22038; 80287; 56496; 23960; 23961; 24014; 66949; 257632; 54486; 100038882	ENSMUSG00000032661; ENSMUSG00000067377; ENSMUSG00000066861; ENSMUSG00000046718; ENSMUSG00000066800; ENSMUSG00000024691; ENSMUSG00000056758; ENSMUSG00000016529; ENSMUSG00000009585; ENSMUSG00000027832; ENSMUSG00000052684; ENSMUSG00000041827; ENSMUSG00000055994; ENSMUSG00000023341; ENSMUSG00000016024; ENSMUSG00000001131; ENSMUSG00000003814; ENSMUSG00000052776; ENSMUSG00000027087; ENSMUSG00000020053;…	181	180
6.47926e-07	4.86664e-06	GO:0006801	b	4	superoxide metabolic process	68891; 268396; 50490; 13057; 13058; 14289; 14528; 14678; 14825; 16173; 16409; 16414; 17751; 17969; 17970; 17972; 18753; 20963; 21803; 21926; 224109	ENSMUSG00000021457; ENSMUSG00000052270; ENSMUSG00000040711; ENSMUSG00000071715; ENSMUSG00000037580; ENSMUSG00000032562; ENSMUSG00000000290; ENSMUSG00000039217; ENSMUSG00000002603; ENSMUSG00000026480; ENSMUSG00000029380; ENSMUSG00000021948; ENSMUSG00000052384; ENSMUSG00000015340; ENSMUSG00000030786; ENSMUSG00000052212; ENSMUSG00000015950; ENSMUSG00000024401; ENSMUSG00000031760; ENSMUSG00000030562;…	64	64
6.70698e-07	5.00985e-06	GO:0030866	b	4	cortical actin cytoskeleton organization	105855; 68743; 71409; 71819; 109042; 12317; 13605; 56193; 215280; 57778; 21894; 21926; 22350; 22376; 23790; 26934	ENSMUSG00000027699; ENSMUSG00000022488; ENSMUSG00000028465; ENSMUSG00000031165; ENSMUSG00000032254; ENSMUSG00000023015; ENSMUSG00000052397; ENSMUSG00000036053; ENSMUSG00000037060; ENSMUSG00000075284; ENSMUSG00000036777; ENSMUSG00000024401; ENSMUSG00000003814; ENSMUSG00000055805; ENSMUSG00000020120; ENSMUSG00000004530	40	40
7.53511e-07	5.59751e-06	GO:0007167	b	4	enzyme linked receptor protein signaling pathway	98496; 16419; 230514; 56792; 16765; 16822; 100952; 226101; 68939; 69178; 235505; 69585; 215114; 110075; 11820; 71602; 71660; 71805; 399558; 215653; 14456; 237542; 74048; 12393; 239463; 231125; 72828; 76884; 12843; 11601; 11602; 11815; 12512; 12579; 78558; 12702; 12977; 12978; 13132; 13448; 13449; 76829; 170676; 13845; 14068; 14103; 14164; 14172; 14178; 14191; 14205; 14219; 14255; 14281; 14360; 14…	ENSMUSG00000040249; ENSMUSG00000032939; ENSMUSG00000027460; ENSMUSG00000038508; ENSMUSG00000025854; ENSMUSG00000052384; ENSMUSG00000025856; ENSMUSG00000030117; ENSMUSG00000030447; ENSMUSG00000031465; ENSMUSG00000025351; ENSMUSG00000021948; ENSMUSG00000039959; ENSMUSG00000032220; ENSMUSG00000018822; ENSMUSG00000029661; ENSMUSG00000057967; ENSMUSG00000053113; ENSMUSG00000031906; ENSMUSG00000019843;…	887	887
8.29968e-07	6.13178e-06	GO:0051017	b	4	actin filament bundle assembly	16419; 16765; 268396; 72754; 50490; 74194; 109624; 109711; 11629; 11853; 11854; 11856; 12631; 13860; 14026; 14086; 14219; 14457; 14744; 56193; 16423; 17118; 17926; 18479; 18643; 18761; 18826; 19229; 118449; 20194; 20947; 21809; 22003; 22240; 22350; 22376; 192176; 30794	ENSMUSG00000055447; ENSMUSG00000031165; ENSMUSG00000024397; ENSMUSG00000021262; ENSMUSG00000021998; ENSMUSG00000019997; ENSMUSG00000030562; ENSMUSG00000021886; ENSMUSG00000031355; ENSMUSG00000018293; ENSMUSG00000026697; ENSMUSG00000050315; ENSMUSG00000002233; ENSMUSG00000015766; ENSMUSG00000026778; ENSMUSG00000022817; ENSMUSG00000015143; ENSMUSG00000069662; ENSMUSG00000052397; ENSMUSG00000029761;…	164	164
9.08101e-07	6.67257e-06	GO:0051276	b	4	chromosome organization	229841; 66311; 66578; 67052; 67141; 67177; 67628; 69270; 69716; 70099; 70218; 66336; 70385; 70472; 70645; 104271; 71819; 71988; 268697; 72107; 105988; 66929; 237911; 94352; 94353; 107435; 110749; 319188; 272551; 76044; 108907; 208084; 110033; 11799; 11810; 12189; 12235; 12428; 12448; 12534; 12649; 12704; 13163; 18602; 13433; 67849; 14048; 14049; 14051; 14156; 14211; 215387; 14841; 14957; 15242; 1…	ENSMUSG00000031262; ENSMUSG00000058385; ENSMUSG00000040084; ENSMUSG00000028678; ENSMUSG00000027306; ENSMUSG00000029516; ENSMUSG00000037313; ENSMUSG00000045328; ENSMUSG00000018654; ENSMUSG00000062727; ENSMUSG00000069308; ENSMUSG00000021948; ENSMUSG00000040007; ENSMUSG00000022360; ENSMUSG00000017146; ENSMUSG00000027379; ENSMUSG00000004698; ENSMUSG00000020897; ENSMUSG00000034329; ENSMUSG00000060639;…	1161	1161
9.43304e-07	6.89377e-06	GO:0002478	b	4	antigen processing and presentation of exogenous peptide antigen	65972; 12010; 14127; 14129; 14130; 14131; 14961; 14991; 14998; 14999; 54445; 26888	ENSMUSG00000059498; ENSMUSG00000036908; ENSMUSG00000060802; ENSMUSG00000026656; ENSMUSG00000030148; ENSMUSG00000015947; ENSMUSG00000037649; ENSMUSG00000073421; ENSMUSG00000079547; ENSMUSG00000016206; ENSMUSG00000058715; ENSMUSG00000031838	24	24
9.77828e-07	7.10766e-06	GO:0007160	b	4	cell-matrix adhesion	16419; 100952; 105298; 12125; 107581; 109711; 11501; 11815; 11854; 11856; 12043; 53867; 78473; 12182; 12512; 12631; 12977; 14219; 14260; 29875; 16401; 16408; 16410; 16414; 16416; 16420; 16421; 16971; 17381; 17387; 83436; 17926; 18787; 18792; 19229; 19261; 19271; 20194; 21825; 21838; 22329; 23790; 223272; 15442	ENSMUSG00000040249; ENSMUSG00000035273; ENSMUSG00000000957; ENSMUSG00000027381; ENSMUSG00000019997; ENSMUSG00000025351; ENSMUSG00000001281; ENSMUSG00000031355; ENSMUSG00000040690; ENSMUSG00000027009; ENSMUSG00000026697; ENSMUSG00000032011; ENSMUSG00000021822; ENSMUSG00000022817; ENSMUSG00000020689; ENSMUSG00000015143; ENSMUSG00000027962; ENSMUSG00000032925; ENSMUSG00000057058; ENSMUSG00000056201;…	204	204
1.02818e-06	7.4337e-06	GO:0043903	b	4	regulation of symbiosis, encompassing mutualism through parasitism	66141; 66848; 231655; 69550; 246730; 12125; 107373; 74735; 11846; 12043; 12306; 12504; 12631; 23962; 12767; 12774; 24088; 14825; 15364; 15900; 16153; 16410; 16476; 16543; 16803; 246727; 17858; 18453; 18643; 19288; 20128; 20302; 20303; 20311; 21926; 21973; 22038; 80287; 66371; 23960; 23961; 24014; 66949; 257632; 100038882	ENSMUSG00000066861; ENSMUSG00000032661; ENSMUSG00000041390; ENSMUSG00000046718; ENSMUSG00000066800; ENSMUSG00000024691; ENSMUSG00000056758; ENSMUSG00000027381; ENSMUSG00000016529; ENSMUSG00000045382; ENSMUSG00000009585; ENSMUSG00000025130; ENSMUSG00000027832; ENSMUSG00000052684; ENSMUSG00000041827; ENSMUSG00000018293; ENSMUSG00000055994; ENSMUSG00000023341; ENSMUSG00000020914; ENSMUSG00000016024;…	211	211
1.2216e-06	8.7851e-06	GO:0001782	b	4	B cell homeostasis	105855; 12044; 12125; 75974; 11486; 12028; 12043; 12505; 210293; 17096; 18707; 18733; 21929; 238875; 57916	ENSMUSG00000058818; ENSMUSG00000022488; ENSMUSG00000003873; ENSMUSG00000010142; ENSMUSG00000057329; ENSMUSG00000005087; ENSMUSG00000102037; ENSMUSG00000038608; ENSMUSG00000046006; ENSMUSG00000027381; ENSMUSG00000039936; ENSMUSG00000017697; ENSMUSG00000031093; ENSMUSG00000042228; ENSMUSG00000019850	37	37
1.36399e-06	9.7572e-06	GO:0043312	b	4	neutrophil degranulation	68891; 74732; 109934; 11745; 16409; 16414; 17916; 19204; 20963	ENSMUSG00000000290; ENSMUSG00000030786; ENSMUSG00000029484; ENSMUSG00000021457; ENSMUSG00000052212; ENSMUSG00000024300; ENSMUSG00000039232; ENSMUSG00000056529; ENSMUSG00000017631	14	14
1.41326e-06	1.00564e-05	GO:0055001	b	4	muscle cell development	226101; 68802; 233199; 50874; 268697; 72330; 68794; 12292; 74777; 11465; 11535; 12043; 12373; 12534; 13009; 14200; 16000; 16905; 17868; 17906; 17930; 18019; 18175; 18479; 79221; 21957; 20969; 21955; 22003; 22388; 22402; 22437; 23828; 24131; 20541; 320502; 58522; 59006; 59011; 93677; 227325; 30948; 228003	ENSMUSG00000028063; ENSMUSG00000013936; ENSMUSG00000062077; ENSMUSG00000027544; ENSMUSG00000030790; ENSMUSG00000068699; ENSMUSG00000064179; ENSMUSG00000031461; ENSMUSG00000068697; ENSMUSG00000050989; ENSMUSG00000041431; ENSMUSG00000028116; ENSMUSG00000019942; ENSMUSG00000027861; ENSMUSG00000074001; ENSMUSG00000061723; ENSMUSG00000004698; ENSMUSG00000054640; ENSMUSG00000020592; ENSMUSG00000020067;…	200	200
1.50918e-06	1.06828e-05	GO:0038061	b	4	NIK/NF-kappaB signaling	21898; 11820; 268857; 170743; 170799; 215653; 171285; 12317; 12475; 24088; 16173; 16176; 81799; 81897; 17394; 19260; 19696; 20698; 21897; 21926; 216799; 56489; 56496; 56532; 56722; 58994; 93692; 257632; 50930	ENSMUSG00000067377; ENSMUSG00000045322; ENSMUSG00000005800; ENSMUSG00000022892; ENSMUSG00000005824; ENSMUSG00000022500; ENSMUSG00000049871; ENSMUSG00000021591; ENSMUSG00000022221; ENSMUSG00000027843; ENSMUSG00000055994; ENSMUSG00000042349; ENSMUSG00000031906; ENSMUSG00000003814; ENSMUSG00000024401; ENSMUSG00000027339; ENSMUSG00000039005; ENSMUSG00000058914; ENSMUSG00000039217; ENSMUSG00000020275;…	112	112
1.61656e-06	1.13833e-05	GO:0051303	b	4	establishment of chromosome localization	229841; 66713; 67052; 67177; 70385; 268697; 74117; 108000; 110033; 11799; 67849; 83815; 66977; 52276; 100502766; 73804; 54141; 66371; 56742; 71878; 381293; 54204; 228421	ENSMUSG00000024056; ENSMUSG00000002055; ENSMUSG00000045328; ENSMUSG00000024791; ENSMUSG00000030677; ENSMUSG00000041431; ENSMUSG00000026341; ENSMUSG00000028678; ENSMUSG00000041498; ENSMUSG00000027115; ENSMUSG00000020152; ENSMUSG00000000486; ENSMUSG00000069910; ENSMUSG00000068744; ENSMUSG00000023919; ENSMUSG00000027654; ENSMUSG00000026683; ENSMUSG00000028873; ENSMUSG00000017716; ENSMUSG00000006585;…	78	78
1.7201e-06	1.20496e-05	GO:0000302	b	4	response to reactive oxygen species	70415; 71805; 11486; 11815; 11846; 12043; 12229; 12428; 12534; 12631; 12955; 13605; 14226; 14281; 14283; 14360; 14528; 15234; 15368; 15439; 16153; 16174; 16193; 16410; 16476; 16819; 16881; 16952; 17189; 17751; 17969; 18753; 19229; 19261; 19275; 20969; 21825; 21926; 21929; 22003; 22228; 56532; 20541; 26362; 212032; 93692; 28240; 23939; 13078	ENSMUSG00000025877; ENSMUSG00000032939; ENSMUSG00000037580; ENSMUSG00000031264; ENSMUSG00000020635; ENSMUSG00000009292; ENSMUSG00000016529; ENSMUSG00000024912; ENSMUSG00000056394; ENSMUSG00000052684; ENSMUSG00000021591; ENSMUSG00000021948; ENSMUSG00000022221; ENSMUSG00000031722; ENSMUSG00000020592; ENSMUSG00000019942; ENSMUSG00000028864; ENSMUSG00000026068; ENSMUSG00000024401; ENSMUSG00000019843;…	242	242
2.06383e-06	1.4383e-05	GO:0050000	b	4	chromosome localization	229841; 66713; 67052; 67177; 70385; 268697; 74117; 108000; 110033; 11799; 67849; 83815; 66977; 52276; 100502766; 73804; 54141; 66371; 56742; 71878; 381293; 54204; 228421	ENSMUSG00000024056; ENSMUSG00000002055; ENSMUSG00000045328; ENSMUSG00000024791; ENSMUSG00000030677; ENSMUSG00000041431; ENSMUSG00000026341; ENSMUSG00000028678; ENSMUSG00000041498; ENSMUSG00000027115; ENSMUSG00000020152; ENSMUSG00000000486; ENSMUSG00000069910; ENSMUSG00000068744; ENSMUSG00000023919; ENSMUSG00000027654; ENSMUSG00000026683; ENSMUSG00000028873; ENSMUSG00000017716; ENSMUSG00000006585;…	79	79
2.6377e-06	1.82664e-05	GO:0140013	b	4	meiotic nuclear division	66197; 66713; 67141; 232174; 69716; 70099; 104271; 268465; 105988; 237911; 74117; 214901; 12235; 12316; 12317; 12448; 14087; 14211; 215387; 17687; 17864; 68549; 18817; 67121; 19361; 66977; 20878; 21973; 22137; 211651; 107995; 12236; 72415; 60530; 54427; 83560; 54204; 228421; 64707	ENSMUSG00000032815; ENSMUSG00000040084; ENSMUSG00000038379; ENSMUSG00000000730; ENSMUSG00000006398; ENSMUSG00000034023; ENSMUSG00000019214; ENSMUSG00000034906; ENSMUSG00000063415; ENSMUSG00000010342; ENSMUSG00000023940; ENSMUSG00000034349; ENSMUSG00000020914; ENSMUSG00000030867; ENSMUSG00000026779; ENSMUSG00000027379; ENSMUSG00000003814; ENSMUSG00000034329; ENSMUSG00000027115; ENSMUSG00000025912;…	178	178
2.64808e-06	1.82664e-05	GO:0051302	b	4	regulation of cell division	101488212; 70218; 71819; 268451; 71877; 108961; 240641; 12314; 12316; 12704; 13605; 14164; 14178; 14205; 15559; 16176; 17869; 18590; 18654; 18817; 19348; 19650; 20877; 20878; 21803; 21809; 21828; 54635; 66371; 23834; 216984; 381293; 26934; 83560; 233406; 207175; 16319	ENSMUSG00000031380; ENSMUSG00000093938; ENSMUSG00000029516; ENSMUSG00000025856; ENSMUSG00000024795; ENSMUSG00000017639; ENSMUSG00000010342; ENSMUSG00000036438; ENSMUSG00000003779; ENSMUSG00000022346; ENSMUSG00000002603; ENSMUSG00000027641; ENSMUSG00000023015; ENSMUSG00000036585; ENSMUSG00000030867; ENSMUSG00000041498; ENSMUSG00000033952; ENSMUSG00000026228; ENSMUSG00000027699; ENSMUSG00000021253;…	165	165
2.74925e-06	1.8868e-05	GO:0036211	b	4	protein modification process	271697; 98496; 21898; 229841; 105855; 98878; 54722; 66197; 230145; 66357; 13051; 76630; 66824; 66889; 67138; 230979; 56792; 67141; 67196; 67397; 67742; 76843; 11308; 330177; 16822; 68169; 100952; 232313; 68612; 232984; 233115; 235505; 142687; 241062; 70415; 332579; 70536; 110075; 11820; 71481; 71660; 279572; 71816; 71988; 268697; 72107; 72119; 268857; 72330; 170643; 269016; 170743; 170744; 105278…	ENSMUSG00000040084; ENSMUSG00000003873; ENSMUSG00000028028; ENSMUSG00000029516; ENSMUSG00000032011; ENSMUSG00000030117; ENSMUSG00000027460; ENSMUSG00000030562; ENSMUSG00000037405; ENSMUSG00000045322; ENSMUSG00000027843; ENSMUSG00000051650; ENSMUSG00000050315; ENSMUSG00000025185; ENSMUSG00000017146; ENSMUSG00000004698; ENSMUSG00000019773; ENSMUSG00000048779; ENSMUSG00000074361; ENSMUSG00000073375;…	3822	3821
2.76916e-06	1.89086e-05	GO:0034599	b	4	cellular response to oxidative stress	21898; 67689; 104156; 70415; 71805; 74041; 74772; 74777; 231207; 11629; 11846; 12043; 12229; 12428; 12534; 12631; 13605; 14281; 14360; 14528; 15234; 15368; 16153; 16174; 16193; 16409; 16476; 16819; 16952; 17210; 17279; 17392; 17751; 229731; 17969; 18453; 18753; 19261; 21825; 21926; 21929; 22003; 56532; 211651; 21899; 20541; 26362; 26570; 212032; 93692; 28240; 56642; 23939; 13078; 65106	ENSMUSG00000025877; ENSMUSG00000032939; ENSMUSG00000037580; ENSMUSG00000031264; ENSMUSG00000035199; ENSMUSG00000034023; ENSMUSG00000040322; ENSMUSG00000009292; ENSMUSG00000024397; ENSMUSG00000016529; ENSMUSG00000013089; ENSMUSG00000050989; ENSMUSG00000021591; ENSMUSG00000030641; ENSMUSG00000035683; ENSMUSG00000026822; ENSMUSG00000002602; ENSMUSG00000024885; ENSMUSG00000019942; ENSMUSG00000028864;…	288	288
2.79997e-06	1.90229e-05	GO:1901652	b	4	response to peptide	98496; 21898; 230514; 67092; 232975; 332579; 11820; 71660; 237542; 106572; 237911; 76267; 231207; 11747; 11810; 11821; 11846; 12322; 12363; 12428; 12631; 12702; 13057; 13058; 13654; 14068; 14130; 14219; 14289; 14360; 14537; 14678; 14784; 29875; 15894; 16000; 16153; 16173; 16176; 16193; 16324; 16416; 16478; 16625; 16800; 16846; 16952; 16971; 17096; 17700; 18430; 18479; 18605; 18751; 18753; 18761; …	ENSMUSG00000029771; ENSMUSG00000035212; ENSMUSG00000059923; ENSMUSG00000021091; ENSMUSG00000071076; ENSMUSG00000040249; ENSMUSG00000032487; ENSMUSG00000026928; ENSMUSG00000016529; ENSMUSG00000069830; ENSMUSG00000030659; ENSMUSG00000030447; ENSMUSG00000022892; ENSMUSG00000031443; ENSMUSG00000052681; ENSMUSG00000020053; ENSMUSG00000026100; ENSMUSG00000006519; ENSMUSG00000024052; ENSMUSG00000037405;…	503	503
3.01244e-06	2.03641e-05	GO:0044784	b	4	metaphase/anaphase transition of cell cycle	229841; 67052; 67141; 67177; 69716; 70385; 268697; 11799; 12235; 12704; 18817; 20877; 22137; 56150; 23834; 21335; 12236; 59126; 83560	ENSMUSG00000017499; ENSMUSG00000069910; ENSMUSG00000040084; ENSMUSG00000041431; ENSMUSG00000038379; ENSMUSG00000021569; ENSMUSG00000024056; ENSMUSG00000026749; ENSMUSG00000029516; ENSMUSG00000045328; ENSMUSG00000017716; ENSMUSG00000029910; ENSMUSG00000030867; ENSMUSG00000020897; ENSMUSG00000010342; ENSMUSG00000027379; ENSMUSG00000037313; ENSMUSG00000006585; ENSMUSG00000019773	59	59
3.2667e-06	2.1973e-05	GO:0030101	b	4	natural killer cell activation	70450; 11891; 171285; 77777; 14456; 74732; 75345; 12142; 12721; 15040; 16173; 16185; 16414; 16846; 18106; 19260; 19264; 19368; 19369; 19370; 22177; 22778; 252838; 56501; 56554; 19419; 26362; 27007	ENSMUSG00000038151; ENSMUSG00000031103; ENSMUSG00000067212; ENSMUSG00000059201; ENSMUSG00000041272; ENSMUSG00000030707; ENSMUSG00000032202; ENSMUSG00000079685; ENSMUSG00000027843; ENSMUSG00000002602; ENSMUSG00000018654; ENSMUSG00000068227; ENSMUSG00000038179; ENSMUSG00000057948; ENSMUSG00000026395; ENSMUSG00000039232; ENSMUSG00000039217; ENSMUSG00000030149; ENSMUSG00000030579; ENSMUSG00000031451;…	110	110
3.40714e-06	2.28042e-05	GO:0043086	b	4	negative regulation of catalytic activity	105855; 66107; 66222; 66824; 67141; 235505; 69550; 17951; 11820; 241197; 104418; 11983; 12047; 269016; 394430; 394434; 394436; 171580; 14456; 74191; 74734; 107895; 231125; 76464; 76469; 72828; 231207; 240672; 240754; 11461; 208084; 11605; 114715; 11745; 11799; 329679; 12306; 12505; 12579; 12802; 12835; 12955; 13011; 13014; 13025; 13197; 14226; 17940; 14678; 14938; 15170; 15234; 15242; 51791; 1535…	ENSMUSG00000099974; ENSMUSG00000051998; ENSMUSG00000031266; ENSMUSG00000045322; ENSMUSG00000057719; ENSMUSG00000029204; ENSMUSG00000021948; ENSMUSG00000044734; ENSMUSG00000031387; ENSMUSG00000027843; ENSMUSG00000026315; ENSMUSG00000004266; ENSMUSG00000090877; ENSMUSG00000029664; ENSMUSG00000018822; ENSMUSG00000040479; ENSMUSG00000001131; ENSMUSG00000034652; ENSMUSG00000019773; ENSMUSG00000026395;…	808	806
3.54031e-06	2.35788e-05	GO:0042542	b	4	response to hydrogen peroxide	70415; 71805; 11486; 11846; 12043; 12534; 12631; 12955; 13605; 14226; 14283; 14360; 15234; 15368; 15439; 16153; 16174; 16193; 16476; 16819; 16881; 16952; 17189; 18753; 19229; 19261; 20969; 21929; 56532; 26362; 212032; 93692; 28240; 23939; 13078	ENSMUSG00000025877; ENSMUSG00000032939; ENSMUSG00000026822; ENSMUSG00000020635; ENSMUSG00000009292; ENSMUSG00000016529; ENSMUSG00000024912; ENSMUSG00000056394; ENSMUSG00000052684; ENSMUSG00000021591; ENSMUSG00000021948; ENSMUSG00000022221; ENSMUSG00000031722; ENSMUSG00000002602; ENSMUSG00000019942; ENSMUSG00000028864; ENSMUSG00000026068; ENSMUSG00000019843; ENSMUSG00000020592; ENSMUSG00000027699;…	154	154
3.99279e-06	2.6319e-05	GO:0048247	b	4	lymphocyte chemotaxis	66102; 14456; 75458; 11501; 12772; 15945; 18600; 19229; 20307; 20293; 20296; 20302; 20303; 20305; 20306; 20308; 321019; 27007; 50930	ENSMUSG00000000982; ENSMUSG00000005824; ENSMUSG00000035385; ENSMUSG00000025473; ENSMUSG00000034855; ENSMUSG00000028927; ENSMUSG00000030149; ENSMUSG00000059456; ENSMUSG00000035352; ENSMUSG00000018927; ENSMUSG00000018920; ENSMUSG00000019122; ENSMUSG00000051212; ENSMUSG00000049103; ENSMUSG00000031451; ENSMUSG00000054400; ENSMUSG00000018930; ENSMUSG00000009185; ENSMUSG00000035373	60	60
3.99279e-06	2.6319e-05	GO:0051306	b	4	mitotic sister chromatid separation	229841; 67052; 67141; 67177; 69716; 70385; 268697; 11799; 12235; 12704; 18817; 20877; 22137; 56150; 23834; 21335; 12236; 59126; 83560	ENSMUSG00000017499; ENSMUSG00000069910; ENSMUSG00000040084; ENSMUSG00000041431; ENSMUSG00000038379; ENSMUSG00000021569; ENSMUSG00000024056; ENSMUSG00000026749; ENSMUSG00000029516; ENSMUSG00000045328; ENSMUSG00000017716; ENSMUSG00000029910; ENSMUSG00000030867; ENSMUSG00000020897; ENSMUSG00000010342; ENSMUSG00000027379; ENSMUSG00000037313; ENSMUSG00000006585; ENSMUSG00000019773	60	60
4.01015e-06	2.6319e-05	GO:0042832	b	4	defense response to protozoan	74481; 11846; 12493; 14469; 15900; 16153; 16190; 16193; 18173; 53314; 21939; 56744; 27027	ENSMUSG00000030798; ENSMUSG00000034266; ENSMUSG00000000244; ENSMUSG00000028270; ENSMUSG00000030748; ENSMUSG00000026177; ENSMUSG00000039699; ENSMUSG00000025746; ENSMUSG00000016529; ENSMUSG00000017652; ENSMUSG00000041515; ENSMUSG00000019987; ENSMUSG00000029373	31	31
4.29862e-06	2.80004e-05	GO:0030239	b	4	myofibril assembly	68802; 233199; 50874; 11465; 12373; 13009; 17868; 17906; 17930; 18175; 21957; 21955; 22003; 22388; 22437; 24131; 320502; 59006; 59011; 93677; 228003	ENSMUSG00000029683; ENSMUSG00000079243; ENSMUSG00000013936; ENSMUSG00000002100; ENSMUSG00000061723; ENSMUSG00000028116; ENSMUSG00000005103; ENSMUSG00000032366; ENSMUSG00000027861; ENSMUSG00000031461; ENSMUSG00000062825; ENSMUSG00000038670; ENSMUSG00000030470; ENSMUSG00000049134; ENSMUSG00000075307; ENSMUSG00000064179; ENSMUSG00000005628; ENSMUSG00000044086; ENSMUSG00000020067; ENSMUSG00000068697;…	71	71
4.30775e-06	2.80004e-05	GO:0002495	b	4	antigen processing and presentation of peptide antigen via MHC class II	65972; 66824; 83433; 14127; 14130; 14961; 14998; 14999; 54445; 72925	ENSMUSG00000073421; ENSMUSG00000026656; ENSMUSG00000030793; ENSMUSG00000037649; ENSMUSG00000036469; ENSMUSG00000036908; ENSMUSG00000079547; ENSMUSG00000023992; ENSMUSG00000058715; ENSMUSG00000031838	19	19
5.21829e-06	3.37566e-05	GO:0051279	b	4	regulation of release of sequestered calcium ion into cytosol	68460; 69810; 71912; 433294; 74777; 233571; 72828; 76757; 12028; 12314; 12373; 12721; 13057; 14226; 15170; 15945; 16416; 17096; 19229; 20191; 21803; 21838; 20541	ENSMUSG00000020635; ENSMUSG00000003873; ENSMUSG00000036438; ENSMUSG00000006519; ENSMUSG00000030707; ENSMUSG00000033044; ENSMUSG00000004266; ENSMUSG00000002603; ENSMUSG00000032011; ENSMUSG00000027861; ENSMUSG00000047343; ENSMUSG00000054640; ENSMUSG00000050989; ENSMUSG00000048779; ENSMUSG00000030147; ENSMUSG00000021313; ENSMUSG00000019787; ENSMUSG00000034855; ENSMUSG00000042228; ENSMUSG00000020689;…	83	83
5.80007e-06	3.73414e-05	GO:0010522	b	4	regulation of calcium ion transport into cytosol	68460; 69810; 71912; 433294; 74777; 233571; 72828; 76757; 12028; 12043; 12314; 12373; 12504; 12721; 13057; 14226; 14360; 15170; 15945; 16416; 17096; 18439; 19229; 20191; 21803; 21838; 20541	ENSMUSG00000020635; ENSMUSG00000003873; ENSMUSG00000036438; ENSMUSG00000006519; ENSMUSG00000030707; ENSMUSG00000033044; ENSMUSG00000004266; ENSMUSG00000002603; ENSMUSG00000032011; ENSMUSG00000027861; ENSMUSG00000047343; ENSMUSG00000050989; ENSMUSG00000054640; ENSMUSG00000019843; ENSMUSG00000048779; ENSMUSG00000030147; ENSMUSG00000029468; ENSMUSG00000021313; ENSMUSG00000019787; ENSMUSG00000034855;…	107	107
5.85645e-06	3.75257e-05	GO:0031098	b	4	stress-activated protein kinase signaling cascade	21898; 66824; 330177; 70415; 332579; 11820; 269016; 215653; 12955; 13132; 13197; 100532; 14125; 14130; 14219; 14235; 15234; 15357; 16176; 16181; 81897; 16543; 16846; 16906; 17096; 17318; 17394; 17873; 17969; 18479; 19229; 19260; 19261; 52033; 20963; 74568; 21926; 21934; 21943; 22350; 24136; 21899; 57912; 19419; 26382; 26410; 26411; 20868; 59126; 257632; 63873; 245527; 338372; 65106; 54612	ENSMUSG00000024013; ENSMUSG00000035199; ENSMUSG00000036390; ENSMUSG00000041390; ENSMUSG00000045322; ENSMUSG00000034457; ENSMUSG00000026656; ENSMUSG00000012519; ENSMUSG00000022892; ENSMUSG00000030793; ENSMUSG00000021457; ENSMUSG00000046722; ENSMUSG00000005800; ENSMUSG00000057719; ENSMUSG00000019997; ENSMUSG00000035299; ENSMUSG00000027843; ENSMUSG00000055994; ENSMUSG00000022150; ENSMUSG00000028864;…	295	295
6.19002e-06	3.9476e-05	GO:0034109	b	4	homotypic cell-cell adhesion	70839; 74012; 108101; 72828; 67451; 12484; 12527; 13506; 14726; 15170; 56193; 16416; 17096; 18753; 18761; 20963; 21943; 20720; 26570; 27027	ENSMUSG00000041957; ENSMUSG00000022015; ENSMUSG00000021948; ENSMUSG00000026249; ENSMUSG00000021457; ENSMUSG00000004266; ENSMUSG00000032020; ENSMUSG00000030342; ENSMUSG00000024331; ENSMUSG00000042228; ENSMUSG00000000244; ENSMUSG00000036353; ENSMUSG00000028583; ENSMUSG00000026778; ENSMUSG00000047139; ENSMUSG00000020120; ENSMUSG00000036894; ENSMUSG00000027737; ENSMUSG00000024965; ENSMUSG00000020689	68	67
6.63411e-06	4.21095e-05	GO:0097193	b	4	intrinsic apoptotic signaling pathway	54722; 66824; 66940; 67397; 12044; 12047; 170799; 12125; 237877; 74041; 11783; 329679; 12028; 12043; 12045; 12122; 12189; 12235; 12363; 12364; 12505; 110876; 12759; 12925; 13555; 15368; 15951; 81535; 17193; 17210; 17279; 68428; 17869; 18453; 18793; 19225; 20201; 20202; 21926; 21938; 22038; 56489; 56532; 56772; 15201; 58801; 26941; 26427; 60530; 56642; 23939; 245527; 13078; 65106	ENSMUSG00000099974; ENSMUSG00000035199; ENSMUSG00000003873; ENSMUSG00000032487; ENSMUSG00000053192; ENSMUSG00000034457; ENSMUSG00000038612; ENSMUSG00000030793; ENSMUSG00000027381; ENSMUSG00000004446; ENSMUSG00000025130; ENSMUSG00000029616; ENSMUSG00000006360; ENSMUSG00000026389; ENSMUSG00000030641; ENSMUSG00000035683; ENSMUSG00000022346; ENSMUSG00000027230; ENSMUSG00000046223; ENSMUSG00000029821;…	289	289
7.01363e-06	4.43104e-05	GO:0048017	b	4	inositol lipid-mediated signaling	268857; 12487; 12978; 14191; 14299; 14360; 15163; 15170; 15234; 244882; 15559; 16000; 16173; 16846; 83490; 17926; 17969; 18162; 18590; 74107; 18707; 19204; 20354; 20682; 54635; 21926; 22350; 20344; 216991; 320207; 20720; 19419; 26941; 30955	ENSMUSG00000022831; ENSMUSG00000021451; ENSMUSG00000059201; ENSMUSG00000025856; ENSMUSG00000020573; ENSMUSG00000025017; ENSMUSG00000062661; ENSMUSG00000056529; ENSMUSG00000049871; ENSMUSG00000022206; ENSMUSG00000026249; ENSMUSG00000004266; ENSMUSG00000026697; ENSMUSG00000024621; ENSMUSG00000028864; ENSMUSG00000024401; ENSMUSG00000019843; ENSMUSG00000024989; ENSMUSG00000020733; ENSMUSG00000026228;…	152	152
7.60497e-06	4.77686e-05	GO:0051051	b	4	negative regulation of transport	98496; 67397; 56807; 69550; 70839; 72054; 170744; 14456; 76757; 12798; 11486; 109934; 11746; 11747; 11815; 12021; 12043; 12314; 12373; 12483; 12495; 12523; 12721; 12772; 12955; 78771; 24088; 14130; 14226; 14678; 15357; 15368; 15464; 15894; 16153; 16165; 16176; 16181; 16193; 81799; 16324; 81897; 16410; 16416; 16423; 16543; 16790; 16846; 16854; 16952; 246746; 279561; 17869; 18430; 18605; 18611; 187…	ENSMUSG00000045322; ENSMUSG00000026656; ENSMUSG00000030447; ENSMUSG00000016529; ENSMUSG00000036438; ENSMUSG00000017631; ENSMUSG00000037405; ENSMUSG00000003484; ENSMUSG00000026249; ENSMUSG00000027843; ENSMUSG00000034652; ENSMUSG00000058914; ENSMUSG00000074361; ENSMUSG00000031880; ENSMUSG00000027398; ENSMUSG00000030577; ENSMUSG00000013698; ENSMUSG00000040152; ENSMUSG00000027499; ENSMUSG00000027712;…	547	547
7.63167e-06	4.77686e-05	GO:0042692	b	4	muscle cell differentiation	232174; 226101; 68802; 233199; 50874; 268697; 72330; 68794; 50490; 12292; 74777; 67220; 207215; 11465; 11535; 12043; 12317; 12362; 12373; 12508; 12534; 13009; 13163; 13433; 14200; 15945; 16000; 16190; 16905; 17387; 17868; 17886; 17906; 17930; 18019; 18175; 18479; 19241; 19664; 79221; 20307; 21957; 20682; 20969; 21803; 21955; 22003; 211323; 22388; 22402; 22437; 216869; 23828; 23886; 24131; 20541; …	ENSMUSG00000028063; ENSMUSG00000042292; ENSMUSG00000013936; ENSMUSG00000005124; ENSMUSG00000062077; ENSMUSG00000000957; ENSMUSG00000027544; ENSMUSG00000030790; ENSMUSG00000068699; ENSMUSG00000063415; ENSMUSG00000064179; ENSMUSG00000038508; ENSMUSG00000005824; ENSMUSG00000030562; ENSMUSG00000022443; ENSMUSG00000068697; ENSMUSG00000050989; ENSMUSG00000021798; ENSMUSG00000041431; ENSMUSG00000002603;…	386	386
7.83242e-06	4.87992e-05	GO:0070269	b	4	pyroptosis	54722; 69146; 17951; 268973; 12362; 12363; 637515; 17948; 17952; 383619	ENSMUSG00000078942; ENSMUSG00000025888; ENSMUSG00000078945; ENSMUSG00000039193; ENSMUSG00000029821; ENSMUSG00000070390; ENSMUSG00000033538; ENSMUSG00000071203; ENSMUSG00000037860; ENSMUSG00000022575	20	20
1.02421e-05	6.35199e-05	GO:0033273	b	4	response to vitamin	67972; 232174; 70789; 14456; 237911; 76267; 11486; 11846; 12443; 14068; 14159; 14226; 14276; 16846; 19225; 19378; 19659; 20296; 20750; 21803; 21923; 21939; 22171; 233979	ENSMUSG00000020635; ENSMUSG00000032487; ENSMUSG00000028364; ENSMUSG00000013584; ENSMUSG00000029304; ENSMUSG00000063415; ENSMUSG00000026866; ENSMUSG00000031443; ENSMUSG00000017652; ENSMUSG00000010663; ENSMUSG00000002603; ENSMUSG00000019943; ENSMUSG00000053158; ENSMUSG00000070348; ENSMUSG00000034329; ENSMUSG00000032725; ENSMUSG00000059201; ENSMUSG00000046402; ENSMUSG00000031451; ENSMUSG00000019987;…	92	92
1.04315e-05	6.41065e-05	GO:0071173	b	4	spindle assembly checkpoint	229841; 67052; 67177; 69716; 70385; 268697; 11799; 12235; 18817; 20877; 22137; 56150; 12236; 83560	ENSMUSG00000069910; ENSMUSG00000040084; ENSMUSG00000041431; ENSMUSG00000038379; ENSMUSG00000021569; ENSMUSG00000024056; ENSMUSG00000045328; ENSMUSG00000017716; ENSMUSG00000029910; ENSMUSG00000030867; ENSMUSG00000020897; ENSMUSG00000010342; ENSMUSG00000027379; ENSMUSG00000006585	38	38
1.04315e-05	6.41065e-05	GO:0071174	b	4	mitotic spindle checkpoint	229841; 67052; 67177; 69716; 70385; 268697; 11799; 12235; 18817; 20877; 22137; 56150; 12236; 83560	ENSMUSG00000069910; ENSMUSG00000040084; ENSMUSG00000041431; ENSMUSG00000038379; ENSMUSG00000021569; ENSMUSG00000024056; ENSMUSG00000045328; ENSMUSG00000017716; ENSMUSG00000029910; ENSMUSG00000030867; ENSMUSG00000020897; ENSMUSG00000010342; ENSMUSG00000027379; ENSMUSG00000006585	38	38
1.11036e-05	6.79281e-05	GO:0031100	b	4	animal organ regeneration	394436; 14456; 11601; 11745; 12428; 12443; 12534; 110639; 14068; 15234; 15368; 16153; 18654; 18826; 20296; 20311; 20878; 21803; 22171; 22228; 26362	ENSMUSG00000025742; ENSMUSG00000025747; ENSMUSG00000002603; ENSMUSG00000029484; ENSMUSG00000027715; ENSMUSG00000005413; ENSMUSG00000019942; ENSMUSG00000070348; ENSMUSG00000028864; ENSMUSG00000035385; ENSMUSG00000089960; ENSMUSG00000004791; ENSMUSG00000021998; ENSMUSG00000002602; ENSMUSG00000031443; ENSMUSG00000031451; ENSMUSG00000031465; ENSMUSG00000033685; ENSMUSG00000029371; ENSMUSG00000016529;…	75	75
1.16326e-05	7.08438e-05	GO:0071236	b	4	cellular response to antibiotic	66713; 70415; 71805; 394436; 76709; 11513; 11846; 12534; 12631; 12759; 12925; 13058; 13163; 13605; 15234; 16153; 16174; 16193; 81897; 16819; 16952; 18753; 18783; 19261; 19385; 20306; 21929; 56532; 20375; 26362; 212032; 93692; 28240; 23939; 13078	ENSMUSG00000025877; ENSMUSG00000032939; ENSMUSG00000006360; ENSMUSG00000026822; ENSMUSG00000006304; ENSMUSG00000056220; ENSMUSG00000016529; ENSMUSG00000005732; ENSMUSG00000002111; ENSMUSG00000021948; ENSMUSG00000022221; ENSMUSG00000045322; ENSMUSG00000002602; ENSMUSG00000019942; ENSMUSG00000028864; ENSMUSG00000026068; ENSMUSG00000089960; ENSMUSG00000022037; ENSMUSG00000020152; ENSMUSG00000035373;…	162	162
1.39064e-05	8.43115e-05	GO:0030199	b	4	collagen fibril organization	100952; 237360; 94352; 56429; 12843; 53867; 12306; 12816; 12832; 16948; 16950; 216725; 56401; 26432; 234407; 67573; 13078	ENSMUSG00000024529; ENSMUSG00000028641; ENSMUSG00000032231; ENSMUSG00000026574; ENSMUSG00000000693; ENSMUSG00000032374; ENSMUSG00000029661; ENSMUSG00000025185; ENSMUSG00000034205; ENSMUSG00000024087; ENSMUSG00000026042; ENSMUSG00000004098; ENSMUSG00000032332; ENSMUSG00000059901; ENSMUSG00000034807; ENSMUSG00000036545; ENSMUSG00000029163	54	54
1.4619e-05	8.82359e-05	GO:0034103	b	4	regulation of tissue remodeling	72828; 11501; 109934; 12028; 12484; 12978; 16173; 16193; 16331; 16410; 16416; 16846; 246256; 18439; 20750; 20963; 21828; 21934; 21943; 23849; 93695; 75766	ENSMUSG00000003873; ENSMUSG00000059089; ENSMUSG00000059201; ENSMUSG00000021457; ENSMUSG00000029304; ENSMUSG00000017631; ENSMUSG00000026288; ENSMUSG00000024621; ENSMUSG00000022303; ENSMUSG00000022015; ENSMUSG00000027087; ENSMUSG00000029468; ENSMUSG00000039217; ENSMUSG00000021702; ENSMUSG00000000078; ENSMUSG00000025746; ENSMUSG00000020689; ENSMUSG00000032020; ENSMUSG00000026321; ENSMUSG00000029816;…	82	82
1.51162e-05	9.04296e-05	GO:0033628	b	4	regulation of cell adhesion mediated by integrin	105855; 70839; 108101; 11486; 78473; 12484; 15170; 16416; 17096; 18787; 18792; 20947; 20963; 107321; 13078	ENSMUSG00000022488; ENSMUSG00000024087; ENSMUSG00000031015; ENSMUSG00000057058; ENSMUSG00000004266; ENSMUSG00000037411; ENSMUSG00000024696; ENSMUSG00000021457; ENSMUSG00000036353; ENSMUSG00000021822; ENSMUSG00000017697; ENSMUSG00000047139; ENSMUSG00000042228; ENSMUSG00000024965; ENSMUSG00000020689	44	44
1.51162e-05	9.04296e-05	GO:0007080	b	4	mitotic metaphase plate congression	229841; 67052; 67177; 70385; 268697; 110033; 67849; 66977; 52276; 100502766; 73804; 66371; 56742; 381293; 228421	ENSMUSG00000069910; ENSMUSG00000041431; ENSMUSG00000026683; ENSMUSG00000024056; ENSMUSG00000028873; ENSMUSG00000028678; ENSMUSG00000045328; ENSMUSG00000041498; ENSMUSG00000068744; ENSMUSG00000024791; ENSMUSG00000006585; ENSMUSG00000027115; ENSMUSG00000079553; ENSMUSG00000030677; ENSMUSG00000027536	44	44
1.7708e-05	0.000105468	GO:0051225	b	4	spindle assembly	76478; 66311; 67141; 71819; 72119; 73420; 76123; 11799; 12316; 15511; 212307; 16551; 16571; 18005; 18817; 100502766; 20877; 20878; 54141; 22154; 66371; 107995; 26934; 192176; 193740; 54204	ENSMUSG00000017716; ENSMUSG00000002055; ENSMUSG00000090877; ENSMUSG00000023015; ENSMUSG00000024277; ENSMUSG00000034311; ENSMUSG00000091971; ENSMUSG00000030867; ENSMUSG00000020897; ENSMUSG00000075266; ENSMUSG00000027469; ENSMUSG00000001525; ENSMUSG00000000486; ENSMUSG00000027883; ENSMUSG00000033952; ENSMUSG00000035439; ENSMUSG00000027496; ENSMUSG00000032254; ENSMUSG00000031328; ENSMUSG00000006398;…	107	107
1.85967e-05	0.000110275	GO:0006063	b	4	uronic acid metabolic process	394432; 394433; 394435; 394430; 394434; 394436; 22236; 94284	ENSMUSG00000054545; ENSMUSG00000090124; ENSMUSG00000089960; ENSMUSG00000090145; ENSMUSG00000089943; ENSMUSG00000090175; ENSMUSG00000090165; ENSMUSG00000090171	14	14
2.17114e-05	0.000128183	GO:0097305	b	4	response to alcohol	225872; 21898; 66713; 67972; 394436; 12550; 76709; 233571; 11513; 11668; 11810; 12043; 12189; 12314; 12370; 12443; 12475; 12534; 12774; 13057; 13058; 13860; 14068; 14281; 14283; 14360; 14702; 15357; 16000; 16323; 16324; 16846; 17700; 19220; 19229; 19361; 20296; 20302; 20306; 217843; 21803; 21923; 22171; 20375; 26411; 15446; 21391	ENSMUSG00000020053; ENSMUSG00000006304; ENSMUSG00000028364; ENSMUSG00000059201; ENSMUSG00000053279; ENSMUSG00000025747; ENSMUSG00000031613; ENSMUSG00000031443; ENSMUSG00000036438; ENSMUSG00000024912; ENSMUSG00000006519; ENSMUSG00000002111; ENSMUSG00000029925; ENSMUSG00000026029; ENSMUSG00000002603; ENSMUSG00000019943; ENSMUSG00000019942; ENSMUSG00000089960; ENSMUSG00000070348; ENSMUSG00000026100;…	250	250
2.20052e-05	0.000129352	GO:0051093	b	4	negative regulation of developmental process	65963; 13051; 56792; 67141; 67628; 100952; 233781; 70809; 70839; 11820; 170741; 270120; 12262; 14456; 74117; 12394; 74511; 238377; 94352; 74762; 76044; 72828; 67451; 240888; 11601; 11602; 109934; 114715; 11857; 12010; 12043; 12306; 12316; 12317; 12399; 12400; 12443; 12484; 12505; 12524; 241950; 12579; 12631; 12704; 12768; 12772; 12774; 231507; 12832; 13009; 13038; 13132; 13163; 13433; 24088; 1355…	ENSMUSG00000037370; ENSMUSG00000040249; ENSMUSG00000027460; ENSMUSG00000038508; ENSMUSG00000018965; ENSMUSG00000029516; ENSMUSG00000042029; ENSMUSG00000027544; ENSMUSG00000029322; ENSMUSG00000000861; ENSMUSG00000031465; ENSMUSG00000017631; ENSMUSG00000023367; ENSMUSG00000042286; ENSMUSG00000070348; ENSMUSG00000018822; ENSMUSG00000004698; ENSMUSG00000033952; ENSMUSG00000027351; ENSMUSG00000063632;…	1089	1089
2.34544e-05	0.000137274	GO:0043412	b	4	macromolecule modification	271697; 98496; 21898; 229841; 105855; 328162; 98878; 54722; 66197; 230145; 66357; 13051; 76630; 66578; 66824; 66889; 67138; 230979; 56792; 67141; 67196; 67397; 67742; 76843; 11308; 330177; 16822; 68169; 100952; 232313; 68612; 232984; 233115; 235505; 142687; 241062; 70415; 332579; 70536; 110075; 11811; 11820; 71481; 71660; 279572; 71816; 71988; 268697; 72107; 72119; 268857; 72330; 170643; 269016; …	ENSMUSG00000040084; ENSMUSG00000003873; ENSMUSG00000028028; ENSMUSG00000029516; ENSMUSG00000032011; ENSMUSG00000030117; ENSMUSG00000027460; ENSMUSG00000030562; ENSMUSG00000037405; ENSMUSG00000045322; ENSMUSG00000027843; ENSMUSG00000051650; ENSMUSG00000050315; ENSMUSG00000025185; ENSMUSG00000017146; ENSMUSG00000004698; ENSMUSG00000019773; ENSMUSG00000048779; ENSMUSG00000074361; ENSMUSG00000073375;…	4001	4000
2.49814e-05	0.000145581	GO:0044267	b	4	cellular protein metabolic process	100040823; 271697; 98496; 21898; 229841; 105855; 66107; 98878; 54722; 66197; 66222; 230145; 66357; 13051; 76630; 66824; 66889; 67138; 230979; 56792; 67141; 67196; 67397; 67557; 67628; 67742; 76843; 11308; 330177; 16822; 68169; 100952; 68318; 232313; 68612; 77011; 232984; 69178; 233115; 235505; 69550; 66211; 142687; 17951; 241062; 332397; 215114; 70415; 332579; 70536; 110075; 11820; 241197; 71373;…	ENSMUSG00000040084; ENSMUSG00000046591; ENSMUSG00000003873; ENSMUSG00000028028; ENSMUSG00000029516; ENSMUSG00000032011; ENSMUSG00000030117; ENSMUSG00000027460; ENSMUSG00000030447; ENSMUSG00000016529; ENSMUSG00000030562; ENSMUSG00000030560; ENSMUSG00000037405; ENSMUSG00000045322; ENSMUSG00000005054; ENSMUSG00000051650; ENSMUSG00000050315; ENSMUSG00000025185; ENSMUSG00000017146; ENSMUSG00000004698;…	4923	4920
2.66616e-05	0.000154706	GO:0031109	b	4	microtubule polymerization or depolymerization	66468; 67141; 16765; 70218; 80986; 17754; 73420; 109242; 12955; 14159; 14168; 15511; 212307; 16800; 17318; 18080; 18479; 19888; 73804; 14544; 219114; 56742; 58522; 381293; 193740; 78767; 63873; 228421	ENSMUSG00000062077; ENSMUSG00000024277; ENSMUSG00000058624; ENSMUSG00000028438; ENSMUSG00000035299; ENSMUSG00000090877; ENSMUSG00000028678; ENSMUSG00000053158; ENSMUSG00000041498; ENSMUSG00000021068; ENSMUSG00000027115; ENSMUSG00000027254; ENSMUSG00000019773; ENSMUSG00000028059; ENSMUSG00000031137; ENSMUSG00000028832; ENSMUSG00000068744; ENSMUSG00000051378; ENSMUSG00000014158; ENSMUSG00000021965;…	122	122
2.71071e-05	0.000156619	GO:0002381	b	4	immunoglobulin production involved in immunoglobulin mediated immune response	50723; 237877; 50931; 12229; 12487; 14961; 16019; 18987; 19264; 53314; 20947; 21803; 21939; 238875; 57914; 69583; 26909; 257632	ENSMUSG00000017550; ENSMUSG00000039748; ENSMUSG00000008496; ENSMUSG00000031015; ENSMUSG00000033467; ENSMUSG00000031264; ENSMUSG00000034266; ENSMUSG00000002603; ENSMUSG00000000732; ENSMUSG00000026012; ENSMUSG00000046006; ENSMUSG00000017652; ENSMUSG00000089669; ENSMUSG00000076617; ENSMUSG00000005465; ENSMUSG00000073421; ENSMUSG00000055994; ENSMUSG00000026395	62	62
3.64616e-05	0.000209771	GO:0035588	b	4	G protein-coupled purinergic receptor signaling pathway	140795; 70839; 74191; 233571; 11486; 11541; 78826; 14678; 19204; 23890	ENSMUSG00000048779; ENSMUSG00000032562; ENSMUSG00000050921; ENSMUSG00000036362; ENSMUSG00000040229; ENSMUSG00000036353; ENSMUSG00000017697; ENSMUSG00000056529; ENSMUSG00000036381; ENSMUSG00000018500	23	23
3.68193e-05	0.000210931	GO:0014812	b	4	muscle cell migration	50490; 76709; 67220; 233571; 11629; 12043; 15117; 29875; 16000; 16173; 16416; 16952; 16971; 17700; 17869; 67771; 18479; 18590; 18787; 18792; 19241; 19664; 21828; 22003; 13078	ENSMUSG00000040249; ENSMUSG00000006304; ENSMUSG00000025856; ENSMUSG00000024397; ENSMUSG00000030562; ENSMUSG00000022346; ENSMUSG00000022367; ENSMUSG00000049775; ENSMUSG00000026100; ENSMUSG00000021822; ENSMUSG00000015745; ENSMUSG00000020053; ENSMUSG00000048779; ENSMUSG00000039217; ENSMUSG00000021702; ENSMUSG00000008475; ENSMUSG00000030536; ENSMUSG00000020689; ENSMUSG00000024087; ENSMUSG00000039191;…	105	105
3.71033e-05	0.000211661	GO:0032418	b	4	lysosome localization	70450; 11541; 12229; 12523; 14125; 14127; 14159; 14191; 15368; 16165; 16190; 17096; 73689; 19354; 217303; 20963; 380732; 56743; 19419	ENSMUSG00000031289; ENSMUSG00000040751; ENSMUSG00000031264; ENSMUSG00000040528; ENSMUSG00000033220; ENSMUSG00000005413; ENSMUSG00000053158; ENSMUSG00000028874; ENSMUSG00000021457; ENSMUSG00000027347; ENSMUSG00000030748; ENSMUSG00000057506; ENSMUSG00000005339; ENSMUSG00000057948; ENSMUSG00000058715; ENSMUSG00000038147; ENSMUSG00000042228; ENSMUSG00000034652; ENSMUSG00000018500	69	69
4.62132e-05	0.000262522	GO:0014070	b	4	response to organic cyclic compound	225872; 66713; 67972; 104174; 230099; 332579; 70789; 70839; 11820; 234779; 268697; 433294; 394436; 433766; 50490; 12292; 55991; 74191; 192662; 74777; 12550; 76709; 214763; 233571; 76267; 11461; 11486; 11601; 11629; 11745; 11846; 11867; 11928; 12043; 12122; 12189; 12314; 12317; 12362; 12373; 12428; 12443; 12522; 12534; 12631; 12759; 12774; 12894; 12955; 13039; 13057; 13058; 13132; 13163; 14068; 14…	ENSMUSG00000018965; ENSMUSG00000045322; ENSMUSG00000016529; ENSMUSG00000031465; ENSMUSG00000036438; ENSMUSG00000030562; ENSMUSG00000050989; ENSMUSG00000047343; ENSMUSG00000070348; ENSMUSG00000017146; ENSMUSG00000054640; ENSMUSG00000020592; ENSMUSG00000063142; ENSMUSG00000048779; ENSMUSG00000054115; ENSMUSG00000028036; ENSMUSG00000058427; ENSMUSG00000015340; ENSMUSG00000024087; ENSMUSG00000027398;…	989	986
5.00825e-05	0.000283312	GO:1901570	b	4	fatty acid derivative biosynthetic process	67420; 66469; 11687; 11689; 11690; 14125; 66447; 16952; 17001; 18783; 19225; 216739; 20698; 20963; 21391; 54486; 54325	ENSMUSG00000018924; ENSMUSG00000029919; ENSMUSG00000025701; ENSMUSG00000020377; ENSMUSG00000032487; ENSMUSG00000026688; ENSMUSG00000056220; ENSMUSG00000021457; ENSMUSG00000030759; ENSMUSG00000006390; ENSMUSG00000060063; ENSMUSG00000005339; ENSMUSG00000020333; ENSMUSG00000024659; ENSMUSG00000029925; ENSMUSG00000061878; ENSMUSG00000029059	59	59
5.03926e-05	0.000283878	GO:0016032	b	4	viral process	66141; 231655; 69550; 246730; 71740; 12125; 14456; 23845; 107373; 74735; 12028; 12043; 12306; 12504; 12631; 23962; 12767; 12774; 15364; 15894; 16410; 16416; 16476; 16543; 246727; 246746; 17858; 17869; 18453; 18643; 19288; 19882; 20128; 20302; 20303; 217305; 21803; 21926; 21973; 22038; 22171; 22329; 80287; 66371; 56532; 23960; 23961; 24014; 58203; 66949; 26362; 100038882	ENSMUSG00000066861; ENSMUSG00000032661; ENSMUSG00000003873; ENSMUSG00000002603; ENSMUSG00000046718; ENSMUSG00000032584; ENSMUSG00000066800; ENSMUSG00000024691; ENSMUSG00000056758; ENSMUSG00000006411; ENSMUSG00000027381; ENSMUSG00000045382; ENSMUSG00000009585; ENSMUSG00000025130; ENSMUSG00000027832; ENSMUSG00000052684; ENSMUSG00000041827; ENSMUSG00000037405; ENSMUSG00000047798; ENSMUSG00000022346;…	295	295
5.15081e-05	0.000288959	GO:0021782	b	4	glial cell development	21898; 11820; 236539; 74761; 12527; 12759; 24088; 14289; 16176; 16409; 16835; 16971; 17096; 17751; 17926; 215798; 20201; 20202; 20666; 21803; 211323; 22352; 56336; 56386; 224109	ENSMUSG00000040249; ENSMUSG00000052384; ENSMUSG00000022892; ENSMUSG00000029070; ENSMUSG00000053398; ENSMUSG00000002603; ENSMUSG00000026697; ENSMUSG00000017929; ENSMUSG00000022037; ENSMUSG00000063632; ENSMUSG00000039005; ENSMUSG00000026728; ENSMUSG00000030786; ENSMUSG00000056124; ENSMUSG00000030342; ENSMUSG00000056054; ENSMUSG00000032193; ENSMUSG00000027398; ENSMUSG00000031760; ENSMUSG00000042228;…	107	107
5.68457e-05	0.000317584	GO:0002474	b	4	antigen processing and presentation of peptide antigen via MHC class I	65972; 12010; 12317; 14127; 14129; 14131; 14964; 15018; 15040; 26888	ENSMUSG00000073411; ENSMUSG00000059498; ENSMUSG00000060802; ENSMUSG00000067212; ENSMUSG00000030148; ENSMUSG00000015947; ENSMUSG00000003814; ENSMUSG00000058715; ENSMUSG00000031838; ENSMUSG00000060550	24	24
5.77545e-05	0.000321334	GO:0097237	b	4	cellular response to toxic substance	67305; 70415; 66469; 71805; 394436; 11461; 11513; 11690; 11846; 77974; 12534; 12631; 13058; 13163; 13605; 14528; 15234; 15368; 15439; 66447; 16153; 16174; 16193; 16819; 16952; 17001; 17751; 18753; 19225; 19261; 19361; 20201; 20202; 20306; 53381; 21926; 21929; 56532; 20375; 26362; 212032; 93692; 28240; 23939; 13078	ENSMUSG00000025877; ENSMUSG00000032939; ENSMUSG00000021123; ENSMUSG00000037580; ENSMUSG00000026822; ENSMUSG00000020377; ENSMUSG00000032487; ENSMUSG00000009292; ENSMUSG00000029059; ENSMUSG00000016529; ENSMUSG00000019987; ENSMUSG00000002111; ENSMUSG00000021948; ENSMUSG00000022221; ENSMUSG00000031722; ENSMUSG00000002602; ENSMUSG00000019942; ENSMUSG00000028864; ENSMUSG00000026068; ENSMUSG00000089960;…	247	245
5.80482e-05	0.000321644	GO:0071608	b	4	macrophage inflammatory protein-1 alpha production	68279; 19261; 54483; 257632; 63873	ENSMUSG00000014158; ENSMUSG00000055994; ENSMUSG00000037902; ENSMUSG00000011008; ENSMUSG00000022534	6	6
5.84371e-05	0.000322478	GO:0097192	b	4	extrinsic apoptotic signaling pathway in absence of ligand	12044; 12047; 12125; 12028; 12043; 12045; 14048; 14049; 14051; 14360; 16000; 16176; 16196; 16323; 16410; 16819; 17210; 21926; 56744; 23939	ENSMUSG00000099974; ENSMUSG00000025932; ENSMUSG00000038612; ENSMUSG00000003873; ENSMUSG00000040329; ENSMUSG00000010461; ENSMUSG00000057329; ENSMUSG00000102037; ENSMUSG00000026822; ENSMUSG00000017897; ENSMUSG00000027381; ENSMUSG00000041324; ENSMUSG00000029373; ENSMUSG00000001034; ENSMUSG00000089929; ENSMUSG00000027398; ENSMUSG00000019843; ENSMUSG00000020053; ENSMUSG00000024401; ENSMUSG00000027087	77	77
5.9193e-05	0.000325032	GO:0071705	b	4	nitrogen compound transport	54563; 21898; 50934; 54725; 54598; 66824; 230979; 67397; 240638; 56807; 67628; 67844; 231834; 68040; 16822; 68278; 84112; 232414; 69146; 69178; 67775; 69608; 102657; 241062; 234396; 70839; 103710; 71279; 71310; 11891; 71607; 71805; 11983; 11987; 268973; 170744; 170829; 269224; 171285; 105785; 270160; 14456; 12289; 17754; 55991; 106572; 74117; 56079; 23845; 238377; 94353; 74732; 74772; 12481; 1404…	ENSMUSG00000040249; ENSMUSG00000032939; ENSMUSG00000073678; ENSMUSG00000018965; ENSMUSG00000031264; ENSMUSG00000030774; ENSMUSG00000046295; ENSMUSG00000001027; ENSMUSG00000051998; ENSMUSG00000059498; ENSMUSG00000037035; ENSMUSG00000029126; ENSMUSG00000016529; ENSMUSG00000024511; ENSMUSG00000025351; ENSMUSG00000029616; ENSMUSG00000030577; ENSMUSG00000018500; ENSMUSG00000056054; ENSMUSG00000021948;…	2157	2156
5.93808e-05	0.000325032	GO:0060249	b	4	anatomical structure homeostasis	21898; 67972; 332397; 104271; 50490; 12289; 17754; 74131; 72828; 207777; 208084; 11501; 12028; 12043; 12290; 12448; 241950; 12721; 12772; 12977; 12978; 13036; 13038; 13040; 14178; 14219; 14255; 14299; 14538; 16193; 16196; 16331; 81897; 16410; 16416; 16541; 246256; 16889; 16905; 17357; 17700; 17869; 18005; 18439; 18538; 18761; 18768; 18783; 19229; 19354; 19361; 216049; 52377; 19888; 20682; 20750; …	ENSMUSG00000021457; ENSMUSG00000028063; ENSMUSG00000026321; ENSMUSG00000003873; ENSMUSG00000040329; ENSMUSG00000042817; ENSMUSG00000059089; ENSMUSG00000031101; ENSMUSG00000047945; ENSMUSG00000072437; ENSMUSG00000026778; ENSMUSG00000029304; ENSMUSG00000021360; ENSMUSG00000062661; ENSMUSG00000019997; ENSMUSG00000000673; ENSMUSG00000027323; ENSMUSG00000030562; ENSMUSG00000019539; ENSMUSG00000030707;…	411	411
6.02183e-05	0.000328287	GO:0045055	b	4	regulated exocytosis	56807; 68891; 70450; 11891; 171580; 12289; 106572; 74732; 11541; 109934; 11745; 12229; 12314; 12322; 12523; 12721; 12772; 242662; 14125; 14127; 14159; 14191; 14299; 14678; 15368; 16165; 16190; 56193; 16409; 16414; 17096; 17916; 18439; 18751; 18752; 215449; 18951; 19204; 19354; 20302; 217303; 20963; 380732; 56743; 319924; 19419; 74051	ENSMUSG00000024300; ENSMUSG00000040751; ENSMUSG00000031264; ENSMUSG00000021457; ENSMUSG00000062661; ENSMUSG00000015968; ENSMUSG00000036438; ENSMUSG00000056529; ENSMUSG00000017631; ENSMUSG00000058715; ENSMUSG00000018500; ENSMUSG00000030707; ENSMUSG00000072214; ENSMUSG00000032202; ENSMUSG00000032562; ENSMUSG00000029484; ENSMUSG00000040722; ENSMUSG00000053158; ENSMUSG00000015653; ENSMUSG00000052681;…	260	260
6.20105e-05	0.0003367	GO:0044057	b	4	regulation of system process	21898; 54598; 69178; 140781; 11820; 433766; 14456; 12289; 12394; 74777; 110880; 76469; 240672; 109624; 11486; 67451; 11535; 11541; 11629; 11689; 11928; 12290; 12314; 12373; 13009; 13040; 13057; 13132; 78830; 13506; 14168; 14219; 14226; 14528; 14660; 14678; 14739; 15200; 15234; 15464; 15894; 16000; 16153; 16176; 16193; 81799; 16323; 16324; 16518; 16531; 16790; 16846; 246256; 16905; 17386; 279561; …	ENSMUSG00000013936; ENSMUSG00000059089; ENSMUSG00000016529; ENSMUSG00000019997; ENSMUSG00000036438; ENSMUSG00000018500; ENSMUSG00000050989; ENSMUSG00000037405; ENSMUSG00000061723; ENSMUSG00000029925; ENSMUSG00000015968; ENSMUSG00000004110; ENSMUSG00000054640; ENSMUSG00000063142; ENSMUSG00000058914; ENSMUSG00000030470; ENSMUSG00000015829; ENSMUSG00000027398; ENSMUSG00000000982; ENSMUSG00000027010;…	595	594
6.40198e-05	0.000346219	GO:0032231	b	4	regulation of actin filament bundle assembly	16765; 268396; 72754; 50490; 11853; 11856; 12631; 14026; 14219; 14744; 56193; 16423; 17926; 18479; 18643; 18761; 118449; 20194; 20947; 21809; 22003; 22376; 192176; 30794	ENSMUSG00000055447; ENSMUSG00000031165; ENSMUSG00000021262; ENSMUSG00000019997; ENSMUSG00000030562; ENSMUSG00000021886; ENSMUSG00000031355; ENSMUSG00000018293; ENSMUSG00000026697; ENSMUSG00000050315; ENSMUSG00000026778; ENSMUSG00000002233; ENSMUSG00000031015; ENSMUSG00000021253; ENSMUSG00000056201; ENSMUSG00000020388; ENSMUSG00000040964; ENSMUSG00000040711; ENSMUSG00000030774; ENSMUSG00000031328;…	102	102
6.49743e-05	0.000349981	GO:0051383	b	4	kinetochore organization	229841; 66311; 67052; 67177; 70099; 14211; 66977; 320394; 26886	ENSMUSG00000028312; ENSMUSG00000026683; ENSMUSG00000024056; ENSMUSG00000034349; ENSMUSG00000045328; ENSMUSG00000045273; ENSMUSG00000006585; ENSMUSG00000036672; ENSMUSG00000075266	20	20
6.61582e-05	0.000354944	GO:0016045	b	4	detection of bacterium	17951; 268973; 24088; 17948; 17952; 21897; 21899; 257632	ENSMUSG00000078942; ENSMUSG00000051498; ENSMUSG00000078945; ENSMUSG00000039193; ENSMUSG00000027995; ENSMUSG00000044827; ENSMUSG00000071203; ENSMUSG00000055994	16	16
7.27689e-05	0.000388868	GO:0002369	b	4	T cell cytokine production	74048; 74131; 11846; 12010; 16173; 16174; 16176; 16177; 16193; 18173; 21938; 216799; 57914	ENSMUSG00000026068; ENSMUSG00000033467; ENSMUSG00000060802; ENSMUSG00000039217; ENSMUSG00000031101; ENSMUSG00000032691; ENSMUSG00000020101; ENSMUSG00000026177; ENSMUSG00000025746; ENSMUSG00000027398; ENSMUSG00000019987; ENSMUSG00000026072; ENSMUSG00000028599	40	39
7.55764e-05	0.000402281	GO:0006936	b	4	muscle contraction	54598; 232975; 233199; 140781; 50874; 71912; 433766; 12289; 12292; 110880; 109624; 11486; 67451; 11541; 11928; 12314; 12373; 12767; 13009; 13506; 14219; 14226; 15559; 16518; 16531; 17189; 17868; 17879; 17884; 17897; 17906; 17930; 18430; 19204; 19225; 20191; 21957; 20698; 21953; 21955; 22003; 22004; 56012; 20541; 320502; 58994; 233979; 93677; 192176; 30948; 212937	ENSMUSG00000057003; ENSMUSG00000020635; ENSMUSG00000013936; ENSMUSG00000053093; ENSMUSG00000032487; ENSMUSG00000020475; ENSMUSG00000041695; ENSMUSG00000064179; ENSMUSG00000045382; ENSMUSG00000019997; ENSMUSG00000036438; ENSMUSG00000056529; ENSMUSG00000031461; ENSMUSG00000018500; ENSMUSG00000002100; ENSMUSG00000040907; ENSMUSG00000001027; ENSMUSG00000027861; ENSMUSG00000024331; ENSMUSG00000061723;…	292	292
8.20264e-05	0.000434901	GO:0071702	b	4	organic substance transport	98496; 54563; 21898; 50934; 54725; 54598; 66824; 230979; 67397; 240638; 56807; 67628; 67844; 231834; 68040; 16822; 68278; 84112; 232414; 69146; 69178; 67775; 69608; 102657; 241062; 234396; 70839; 103710; 71279; 71310; 11891; 71607; 71720; 71805; 71898; 11983; 104681; 11987; 71939; 72054; 268973; 170744; 170829; 269224; 171285; 105785; 270160; 14456; 237542; 12289; 17754; 55991; 106572; 73822; 741…	ENSMUSG00000040249; ENSMUSG00000032939; ENSMUSG00000073678; ENSMUSG00000018965; ENSMUSG00000031264; ENSMUSG00000030774; ENSMUSG00000046295; ENSMUSG00000001027; ENSMUSG00000051998; ENSMUSG00000036992; ENSMUSG00000059498; ENSMUSG00000037035; ENSMUSG00000029126; ENSMUSG00000020865; ENSMUSG00000024511; ENSMUSG00000025351; ENSMUSG00000031539; ENSMUSG00000029616; ENSMUSG00000025324; ENSMUSG00000018500;…	2556	2555
8.5979e-05	0.000453325	GO:0036293	b	4	response to decreased oxygen levels	68169; 230099; 268697; 236900; 50490; 237911; 94352; 231207; 11486; 11501; 11601; 11602; 11783; 12043; 12362; 12428; 12484; 12955; 13057; 13058; 13555; 14068; 14205; 14219; 15368; 16173; 16531; 246154; 16846; 16905; 17189; 17381; 17387; 17392; 17751; 17869; 18430; 18453; 18479; 18654; 18792; 19225; 19229; 19664; 20191; 20296; 20525; 21803; 21809; 22228; 69573; 20541; 21335; 64707	ENSMUSG00000031380; ENSMUSG00000027460; ENSMUSG00000028063; ENSMUSG00000032487; ENSMUSG00000037313; ENSMUSG00000059201; ENSMUSG00000043421; ENSMUSG00000031465; ENSMUSG00000031443; ENSMUSG00000025130; ENSMUSG00000030562; ENSMUSG00000006519; ENSMUSG00000031760; ENSMUSG00000041431; ENSMUSG00000022346; ENSMUSG00000043613; ENSMUSG00000033685; ENSMUSG00000034205; ENSMUSG00000021822; ENSMUSG00000034329;…	316	316
8.6172e-05	0.000453325	GO:1900048	b	4	positive regulation of hemostasis	21898; 14068; 14726; 56193; 18787; 19271; 20202; 21825; 20344; 15442	ENSMUSG00000025314; ENSMUSG00000035273; ENSMUSG00000040152; ENSMUSG00000056071; ENSMUSG00000037411; ENSMUSG00000026580; ENSMUSG00000028583; ENSMUSG00000031443; ENSMUSG00000020120; ENSMUSG00000039005	25	25
9.64429e-05	0.0005052	GO:0002831	b	4	regulation of response to biotic stimulus	66824; 234311; 171285; 77777; 214763; 11846; 12484; 12493; 12523; 13057; 24088; 14825; 16176; 16365; 17079; 17084; 17087; 17381; 80861; 19260; 19369; 20311; 20737; 21929; 80287; 383619; 56496; 27007; 27027; 257632	ENSMUSG00000067377; ENSMUSG00000030798; ENSMUSG00000078452; ENSMUSG00000030793; ENSMUSG00000009585; ENSMUSG00000037921; ENSMUSG00000006519; ENSMUSG00000025779; ENSMUSG00000079685; ENSMUSG00000027843; ENSMUSG00000000244; ENSMUSG00000055994; ENSMUSG00000037860; ENSMUSG00000021624; ENSMUSG00000017830; ENSMUSG00000030149; ENSMUSG00000027398; ENSMUSG00000019987; ENSMUSG00000029371; ENSMUSG00000047139;…	144	144
9.67801e-05	0.0005052	GO:0006665	b	4	sphingolipid metabolic process	66775; 100340; 66190; 100503915; 11886; 74442; 11605; 12028; 241447; 13244; 14347; 14421; 15211; 15212; 81535; 18439; 18753; 20698; 22234; 56336; 56386; 58994; 26877; 239559; 26889; 54325; 223753	ENSMUSG00000021665; ENSMUSG00000031266; ENSMUSG00000003873; ENSMUSG00000034780; ENSMUSG00000021948; ENSMUSG00000028885; ENSMUSG00000036587; ENSMUSG00000017929; ENSMUSG00000031906; ENSMUSG00000047878; ENSMUSG00000006731; ENSMUSG00000029468; ENSMUSG00000050931; ENSMUSG00000071724; ENSMUSG00000056124; ENSMUSG00000035891; ENSMUSG00000031591; ENSMUSG00000030760; ENSMUSG00000061878; ENSMUSG00000026317;…	124	124
0.000114503	0.000595414	GO:0040013	b	4	negative regulation of locomotion	13051; 56792; 100952; 69550; 70415; 237542; 74012; 192662; 74748; 12550; 12798; 11486; 67451; 11601; 11602; 11629; 109934; 114715; 11815; 11857; 12043; 12317; 12512; 12631; 12774; 78771; 14026; 15116; 16181; 16971; 17342; 18600; 18787; 19271; 52392; 19664; 20293; 20354; 217303; 20355; 21803; 21825; 21838; 21857; 22003; 211323; 22240; 22376; 319430; 57781; 23790; 26941; 27007; 110168; 13078	ENSMUSG00000040249; ENSMUSG00000027460; ENSMUSG00000031165; ENSMUSG00000021451; ENSMUSG00000046718; ENSMUSG00000053318; ENSMUSG00000024397; ENSMUSG00000021262; ENSMUSG00000044768; ENSMUSG00000022667; ENSMUSG00000004665; ENSMUSG00000025132; ENSMUSG00000031465; ENSMUSG00000025351; ENSMUSG00000017631; ENSMUSG00000021596; ENSMUSG00000002603; ENSMUSG00000035158; ENSMUSG00000032011; ENSMUSG00000000627;…	327	327
0.000137611	0.000710117	GO:0002438	b	4	acute inflammatory response to antigenic stimulus	12229; 12511; 14125; 14127; 14129; 14130; 14131; 15040; 15894; 16016; 20737	ENSMUSG00000037405; ENSMUSG00000059498; ENSMUSG00000031264; ENSMUSG00000026656; ENSMUSG00000067212; ENSMUSG00000051457; ENSMUSG00000015947; ENSMUSG00000005339; ENSMUSG00000058715; ENSMUSG00000076613; ENSMUSG00000024670	31	31
0.000137611	0.000710117	GO:0032607	b	4	interferon-alpha production	21898; 268857; 170743; 170744; 171285; 14255; 81897; 17381; 19260; 54123; 64685	ENSMUSG00000027843; ENSMUSG00000045322; ENSMUSG00000049723; ENSMUSG00000042817; ENSMUSG00000040522; ENSMUSG00000020399; ENSMUSG00000025498; ENSMUSG00000044583; ENSMUSG00000026946; ENSMUSG00000049871; ENSMUSG00000039005	31	31
0.000139848	0.000718914	GO:0032886	b	4	regulation of microtubule-based process	66468; 16765; 72119; 80986; 17754; 66985; 73420; 76123; 77744; 12449; 12649; 14159; 14168; 15511; 212307; 16551; 16800; 17318; 18005; 18080; 18479; 18817; 19385; 100502766; 19888; 20460; 20620; 20873; 54141; 14544; 219114; 66371; 56742; 21335; 58251; 58522; 28105; 193740; 207175; 56289; 63873; 228421	ENSMUSG00000062077; ENSMUSG00000024277; ENSMUSG00000027469; ENSMUSG00000027883; ENSMUSG00000058624; ENSMUSG00000005732; ENSMUSG00000010067; ENSMUSG00000076433; ENSMUSG00000028718; ENSMUSG00000033949; ENSMUSG00000035299; ENSMUSG00000090877; ENSMUSG00000032113; ENSMUSG00000014158; ENSMUSG00000053158; ENSMUSG00000091971; ENSMUSG00000030867; ENSMUSG00000022070; ENSMUSG00000021068; ENSMUSG00000027115;…	232	232
0.000156142	0.000796619	GO:0033029	b	4	regulation of neutrophil apoptotic process	12505; 14130; 16173; 16952; 18707; 26570	ENSMUSG00000005087; ENSMUSG00000039217; ENSMUSG00000026656; ENSMUSG00000027737; ENSMUSG00000039936; ENSMUSG00000024659	10	10
0.000156142	0.000796619	GO:0031620	b	4	regulation of fever generation	12774; 16176; 19225; 21926; 21934; 21943	ENSMUSG00000032487; ENSMUSG00000026321; ENSMUSG00000022015; ENSMUSG00000024401; ENSMUSG00000027398; ENSMUSG00000079227	10	10
0.000162852	0.000827731	GO:0070542	b	4	response to fatty acid	98496; 21898; 104174; 268697; 236900; 233571; 12894; 24088; 13555; 14219; 14702; 16835; 19204; 19220; 19225; 19385; 20296; 21923; 233079; 22228; 21391; 63873	ENSMUSG00000032487; ENSMUSG00000028364; ENSMUSG00000019997; ENSMUSG00000005732; ENSMUSG00000056529; ENSMUSG00000033685; ENSMUSG00000041431; ENSMUSG00000029925; ENSMUSG00000014158; ENSMUSG00000035232; ENSMUSG00000039005; ENSMUSG00000048779; ENSMUSG00000028036; ENSMUSG00000051314; ENSMUSG00000032193; ENSMUSG00000045658; ENSMUSG00000024827; ENSMUSG00000024900; ENSMUSG00000035385; ENSMUSG00000027995;…	95	95
0.000170952	0.000865647	GO:0007019	b	4	microtubule depolymerization	16765; 70218; 80986; 17754; 73420; 109242; 14168; 16800; 17318; 19888; 73804; 58522; 381293; 63873; 228421	ENSMUSG00000028059; ENSMUSG00000028678; ENSMUSG00000031137; ENSMUSG00000062077; ENSMUSG00000014158; ENSMUSG00000028832; ENSMUSG00000035299; ENSMUSG00000037725; ENSMUSG00000041498; ENSMUSG00000051378; ENSMUSG00000031971; ENSMUSG00000028438; ENSMUSG00000025900; ENSMUSG00000027254; ENSMUSG00000027115	53	53
0.000181879	0.000917537	GO:0008347	b	4	glial cell migration	56792; 70839; 12772; 12977; 13003; 15212; 16971; 16975; 17387; 494504; 216616; 20293; 20296; 20302; 22352; 321019	ENSMUSG00000040249; ENSMUSG00000021665; ENSMUSG00000029254; ENSMUSG00000028613; ENSMUSG00000000982; ENSMUSG00000014599; ENSMUSG00000000957; ENSMUSG00000020467; ENSMUSG00000051212; ENSMUSG00000036353; ENSMUSG00000035385; ENSMUSG00000021614; ENSMUSG00000049103; ENSMUSG00000035352; ENSMUSG00000026728; ENSMUSG00000071847	59	59
0.000184037	0.000924972	GO:0050832	b	4	defense response to fungus	71660; 72042; 100689; 11846; 14825; 16172; 17969; 18707; 21803; 56620	ENSMUSG00000023349; ENSMUSG00000002603; ENSMUSG00000031827; ENSMUSG00000029380; ENSMUSG00000009281; ENSMUSG00000002897; ENSMUSG00000015950; ENSMUSG00000037379; ENSMUSG00000039936; ENSMUSG00000019987	27	27
0.000186118	0.000929485	GO:0035701	b	4	hematopoietic stem cell migration	14456; 12767; 12772; 19264; 58208	ENSMUSG00000031451; ENSMUSG00000045382; ENSMUSG00000026395; ENSMUSG00000048251; ENSMUSG00000049103	7	7
0.000186309	0.000929485	GO:0001667	b	4	ameboidal-type cell migration	68743; 68792; 332397; 70839; 71805; 72461; 74117; 94352; 11501; 11541; 11601; 11602; 114715; 11745; 11857; 12317; 12331; 12512; 12631; 12767; 13036; 14026; 14164; 14172; 14178; 15116; 15117; 15200; 15368; 15559; 212307; 16000; 16401; 16410; 16414; 16416; 16421; 16476; 16952; 17381; 17886; 18479; 18643; 18787; 19141; 19225; 19229; 52392; 79221; 20354; 20401; 20620; 20682; 20355; 21803; 21825; 2185…	ENSMUSG00000032939; ENSMUSG00000027460; ENSMUSG00000002603; ENSMUSG00000032487; ENSMUSG00000024277; ENSMUSG00000072437; ENSMUSG00000030774; ENSMUSG00000021262; ENSMUSG00000044768; ENSMUSG00000036777; ENSMUSG00000017652; ENSMUSG00000045382; ENSMUSG00000031465; ENSMUSG00000025351; ENSMUSG00000001281; ENSMUSG00000018500; ENSMUSG00000052684; ENSMUSG00000024486; ENSMUSG00000029484; ENSMUSG00000061119;…	411	411
0.000190633	0.000947557	GO:0035587	b	4	purinergic receptor signaling pathway	140795; 70839; 74191; 233571; 11486; 11541; 78826; 14678; 18439; 19204; 23890	ENSMUSG00000048779; ENSMUSG00000029468; ENSMUSG00000032562; ENSMUSG00000050921; ENSMUSG00000036362; ENSMUSG00000040229; ENSMUSG00000036353; ENSMUSG00000017697; ENSMUSG00000056529; ENSMUSG00000036381; ENSMUSG00000018500	32	32
0.00019358	0.000957607	GO:0060348	b	4	bone development	54725; 231633; 11308; 232174; 69480; 233781; 234356; 268396; 12393; 74511; 238377; 12306; 12816; 12833; 12834; 12835; 14172; 15117; 15170; 16000; 16846; 17386; 17387; 17926; 17937; 18590; 18718; 19264; 20354; 20682; 21803; 21825; 54635; 21943; 22177; 56401; 80752; 58994; 63873; 97086; 212937	ENSMUSG00000048126; ENSMUSG00000020241; ENSMUSG00000026697; ENSMUSG00000059201; ENSMUSG00000025854; ENSMUSG00000025856; ENSMUSG00000026737; ENSMUSG00000063415; ENSMUSG00000030657; ENSMUSG00000022015; ENSMUSG00000028641; ENSMUSG00000004266; ENSMUSG00000002603; ENSMUSG00000022367; ENSMUSG00000032076; ENSMUSG00000036356; ENSMUSG00000057967; ENSMUSG00000047415; ENSMUSG00000001119; ENSMUSG00000032332;…	228	228
0.000194071	0.000957607	GO:0032494	b	4	response to peptidoglycan	332579; 83433; 12273; 24088; 216799; 27056; 257632	ENSMUSG00000029771; ENSMUSG00000026928; ENSMUSG00000027995; ENSMUSG00000032691; ENSMUSG00000049130; ENSMUSG00000023992; ENSMUSG00000055994	14	14
0.000261864	0.00128742	GO:0045132	b	4	meiotic chromosome segregation	66713; 69716; 70099; 104271; 268465; 105988; 237911; 74117; 12235; 12448; 14211; 215387; 17687; 68549; 18817; 66977; 21973; 22137; 211651; 12236; 72415; 54204	ENSMUSG00000000486; ENSMUSG00000040084; ENSMUSG00000038379; ENSMUSG00000034023; ENSMUSG00000034906; ENSMUSG00000023940; ENSMUSG00000034349; ENSMUSG00000020914; ENSMUSG00000030867; ENSMUSG00000027379; ENSMUSG00000034329; ENSMUSG00000020152; ENSMUSG00000039055; ENSMUSG00000021569; ENSMUSG00000028212; ENSMUSG00000028312; ENSMUSG00000058290; ENSMUSG00000009628; ENSMUSG00000026683; ENSMUSG00000026341;…	98	98
0.000268002	0.00131282	GO:0032608	b	4	interferon-beta production	21898; 66824; 268857; 170743; 170744; 24088; 81897; 19260; 19261; 19696; 22036; 225471; 54123; 97165; 64685	ENSMUSG00000032586; ENSMUSG00000020275; ENSMUSG00000027843; ENSMUSG00000045322; ENSMUSG00000025498; ENSMUSG00000027995; ENSMUSG00000040522; ENSMUSG00000056130; ENSMUSG00000030793; ENSMUSG00000026946; ENSMUSG00000037902; ENSMUSG00000044583; ENSMUSG00000054717; ENSMUSG00000049871; ENSMUSG00000039005	55	55
0.000294129	0.0014356	GO:0071605	b	4	monocyte chemotactic protein-1 production	11815; 12484; 12523; 16176; 81799; 68279; 257632; 63873	ENSMUSG00000058914; ENSMUSG00000055994; ENSMUSG00000022548; ENSMUSG00000011008; ENSMUSG00000014158; ENSMUSG00000027398; ENSMUSG00000047139; ENSMUSG00000038147	19	19
0.000297288	0.0014458	GO:0006690	b	4	icosanoid metabolic process	21898; 231871; 66469; 72054; 76267; 11687; 11689; 11690; 24088; 14125; 14726; 66447; 67103; 16952; 17001; 17969; 18783; 19225; 20698; 20963; 15446; 21391; 54486; 13078	ENSMUSG00000056220; ENSMUSG00000032487; ENSMUSG00000039206; ENSMUSG00000021457; ENSMUSG00000060063; ENSMUSG00000031613; ENSMUSG00000003484; ENSMUSG00000010663; ENSMUSG00000018924; ENSMUSG00000029925; ENSMUSG00000028583; ENSMUSG00000039005; ENSMUSG00000020377; ENSMUSG00000015950; ENSMUSG00000028378; ENSMUSG00000061878; ENSMUSG00000024087; ENSMUSG00000029919; ENSMUSG00000025701; ENSMUSG00000027995;…	112	112
0.000314032	0.00152176	GO:0090594	b	4	inflammatory response to wounding	12484; 12505; 12772; 15368; 17312; 21857	ENSMUSG00000005087; ENSMUSG00000005413; ENSMUSG00000000318; ENSMUSG00000001131; ENSMUSG00000049103; ENSMUSG00000047139	11	11
0.000328302	0.00158523	GO:0043902	b	4	positive regulation of multi-organism process	234311; 12125; 171285; 218454; 11846; 12306; 12504; 12631; 12774; 13057; 24088; 14825; 16173; 16323; 16324; 16365; 16476; 16543; 17079; 17084; 17087; 80861; 18430; 18453; 18643; 18792; 19204; 20128; 20878; 21973; 66371; 257632	ENSMUSG00000041390; ENSMUSG00000027381; ENSMUSG00000025130; ENSMUSG00000052684; ENSMUSG00000056529; ENSMUSG00000025779; ENSMUSG00000018293; ENSMUSG00000055994; ENSMUSG00000020914; ENSMUSG00000021822; ENSMUSG00000006519; ENSMUSG00000021624; ENSMUSG00000045312; ENSMUSG00000017830; ENSMUSG00000039217; ENSMUSG00000056201; ENSMUSG00000037035; ENSMUSG00000019987; ENSMUSG00000037921; ENSMUSG00000032231;…	168	168
0.000374234	0.0017994	GO:0010212	b	4	response to ionizing radiation	77011; 50490; 74041; 11810; 12028; 12043; 12189; 12443; 12955; 13057; 623474; 13197; 13605; 14048; 14784; 15270; 15364; 16952; 17869; 19264; 19361; 19362; 19366; 20296; 20306; 20310; 21803; 211651; 58801; 60530	ENSMUSG00000025932; ENSMUSG00000046591; ENSMUSG00000003873; ENSMUSG00000034023; ENSMUSG00000056758; ENSMUSG00000036390; ENSMUSG00000049932; ENSMUSG00000030562; ENSMUSG00000006519; ENSMUSG00000030641; ENSMUSG00000022346; ENSMUSG00000002603; ENSMUSG00000070348; ENSMUSG00000017146; ENSMUSG00000078773; ENSMUSG00000026395; ENSMUSG00000059923; ENSMUSG00000027699; ENSMUSG00000030346; ENSMUSG00000058427;…	155	155
0.000375319	0.0017994	GO:0019730	b	4	antimicrobial humoral response	71660; 71693; 100689; 404711; 14825; 15040; 15945; 16069; 16365; 20202; 20296; 20310; 20311; 56744; 319180; 319181; 319183; 319184; 319185; 319187; 57349; 257632; 78416	ENSMUSG00000058385; ENSMUSG00000067149; ENSMUSG00000067212; ENSMUSG00000037379; ENSMUSG00000062727; ENSMUSG00000021880; ENSMUSG00000055994; ENSMUSG00000036655; ENSMUSG00000069300; ENSMUSG00000076612; ENSMUSG00000094338; ENSMUSG00000058427; ENSMUSG00000009281; ENSMUSG00000034855; ENSMUSG00000029371; ENSMUSG00000029373; ENSMUSG00000029372; ENSMUSG00000035385; ENSMUSG00000056071; ENSMUSG00000029380;…	123	107
0.000385467	0.00184152	GO:0060341	b	4	regulation of cellular localization	98496; 230514; 67052; 67177; 56807; 67628; 68460; 69810; 70450; 11983; 71912; 433294; 14456; 12289; 17754; 74117; 56079; 238377; 94353; 74772; 74777; 12550; 76709; 76123; 233571; 83433; 72828; 76757; 240641; 11461; 11541; 11799; 11815; 12021; 12028; 12043; 12189; 12290; 12306; 12314; 12322; 12373; 12448; 12504; 12523; 12534; 12631; 12721; 12955; 13057; 13132; 13175; 242662; 13605; 67849; 14125; 1…	ENSMUSG00000040249; ENSMUSG00000003873; ENSMUSG00000022831; ENSMUSG00000030447; ENSMUSG00000036438; ENSMUSG00000018500; ENSMUSG00000050989; ENSMUSG00000021948; ENSMUSG00000028931; ENSMUSG00000027843; ENSMUSG00000004266; ENSMUSG00000047343; ENSMUSG00000017146; ENSMUSG00000015968; ENSMUSG00000004110; ENSMUSG00000026778; ENSMUSG00000034652; ENSMUSG00000019843; ENSMUSG00000028333; ENSMUSG00000027797;…	973	973
0.000441023	0.00209952	GO:0070848	b	4	response to growth factor	16419; 98878; 13051; 100952; 226101; 68939; 235505; 69585; 11820; 399558; 50490; 14456; 74048; 74117; 12393; 12394; 76709; 76884; 12843; 11601; 11745; 11783; 11846; 78473; 12399; 12428; 12505; 12512; 12579; 78558; 12631; 12721; 13132; 13433; 76829; 13555; 170676; 14103; 14164; 14172; 14178; 14205; 14219; 14281; 14360; 14538; 14562; 14733; 15116; 15117; 15234; 15242; 29875; 16153; 16193; 16416; 16…	ENSMUSG00000038508; ENSMUSG00000027293; ENSMUSG00000025854; ENSMUSG00000030117; ENSMUSG00000030447; ENSMUSG00000016529; ENSMUSG00000031465; ENSMUSG00000025351; ENSMUSG00000030562; ENSMUSG00000022367; ENSMUSG00000029661; ENSMUSG00000057967; ENSMUSG00000018822; ENSMUSG00000031906; ENSMUSG00000019843; ENSMUSG00000063632; ENSMUSG00000001034; ENSMUSG00000021190; ENSMUSG00000019987; ENSMUSG00000031760;…	670	670
0.000446899	0.00212002	GO:0032495	b	4	response to muramyl dipeptide	332579; 16800; 19260; 21929; 22352; 27056; 257632; 195046	ENSMUSG00000029771; ENSMUSG00000028059; ENSMUSG00000027843; ENSMUSG00000026728; ENSMUSG00000026928; ENSMUSG00000055994; ENSMUSG00000069830; ENSMUSG00000019850	20	20
0.000450596	0.00212795	GO:0022008	b	4	neurogenesis	21898; 105855; 54722; 13051; 66713; 56792; 67263; 264134; 16765; 11308; 104156; 231830; 231871; 68169; 68588; 68802; 233781; 332397; 70415; 70839; 11820; 235379; 11951; 399558; 277360; 236539; 72832; 12140; 241568; 270120; 14456; 73710; 17754; 74117; 12393; 12394; 74761; 74762; 140570; 12550; 171166; 240641; 76884; 11461; 11535; 11658; 11815; 12010; 12028; 12043; 12142; 12316; 12317; 12322; 54712…	ENSMUSG00000040249; ENSMUSG00000038151; ENSMUSG00000023015; ENSMUSG00000003873; ENSMUSG00000048251; ENSMUSG00000029516; ENSMUSG00000022150; ENSMUSG00000037313; ENSMUSG00000015829; ENSMUSG00000021665; ENSMUSG00000032011; ENSMUSG00000021262; ENSMUSG00000074785; ENSMUSG00000051650; ENSMUSG00000030447; ENSMUSG00000056071; ENSMUSG00000018507; ENSMUSG00000018965; ENSMUSG00000056054; ENSMUSG00000026249;…	1745	1744
0.000451717	0.00212795	GO:0071229	b	4	cellular response to acid chemical	98496; 232174; 232975; 11951; 268697; 236900; 107581; 12550; 233571; 12843; 12832; 12833; 12894; 13057; 13058; 13433; 13555; 14276; 14360; 14702; 16835; 16846; 17096; 17392; 19204; 19220; 19229; 19378; 19385; 20296; 20682; 54635; 21923; 21926; 233079; 23999	ENSMUSG00000028364; ENSMUSG00000059201; ENSMUSG00000063415; ENSMUSG00000005732; ENSMUSG00000056529; ENSMUSG00000006519; ENSMUSG00000041431; ENSMUSG00000040690; ENSMUSG00000040907; ENSMUSG00000043613; ENSMUSG00000029661; ENSMUSG00000026042; ENSMUSG00000001119; ENSMUSG00000024401; ENSMUSG00000019843; ENSMUSG00000032725; ENSMUSG00000048779; ENSMUSG00000013584; ENSMUSG00000006057; ENSMUSG00000028036;…	200	200
0.000469328	0.00220324	GO:1901136	b	4	carbohydrate derivative catabolic process	66848; 109901; 11811; 70025; 74091; 12655; 50773; 11486; 11605; 110006; 11810; 12505; 14733; 15211; 15212; 15452; 17381; 18753; 19703; 21803; 218461; 22271; 80287; 56045; 27052; 15442	ENSMUSG00000021665; ENSMUSG00000031266; ENSMUSG00000031387; ENSMUSG00000021322; ENSMUSG00000021684; ENSMUSG00000009585; ENSMUSG00000021948; ENSMUSG00000028937; ENSMUSG00000035273; ENSMUSG00000002603; ENSMUSG00000034220; ENSMUSG00000040809; ENSMUSG00000025630; ENSMUSG00000023031; ENSMUSG00000020736; ENSMUSG00000040613; ENSMUSG00000005087; ENSMUSG00000020407; ENSMUSG00000040694; ENSMUSG00000042684;…	129	129
0.000480622	0.00223299	GO:1903972	b	4	regulation of cellular response to macrophage colony-stimulating factor stimulus	21898; 56792; 12977; 24088	ENSMUSG00000014599; ENSMUSG00000027995; ENSMUSG00000029254; ENSMUSG00000039005	5	5
0.000480622	0.00223299	GO:0051256	b	4	mitotic spindle midzone assembly	71819; 16571; 20877; 26934	ENSMUSG00000020897; ENSMUSG00000032254; ENSMUSG00000023015; ENSMUSG00000034311	5	5
0.000480622	0.00223299	GO:0018057	b	4	peptidyl-lysine oxidation	94352; 16948; 16950; 67573	ENSMUSG00000000693; ENSMUSG00000034205; ENSMUSG00000024529; ENSMUSG00000025185	5	5
0.000484665	0.00224406	GO:0071260	b	4	cellular response to mechanical stimulus	21898; 170743; 170744; 192662; 12798; 11928; 13057; 13197; 16176; 16416; 16518; 19225; 20525; 20682; 21803; 21939; 50930	ENSMUSG00000017652; ENSMUSG00000036390; ENSMUSG00000000567; ENSMUSG00000027398; ENSMUSG00000032487; ENSMUSG00000002603; ENSMUSG00000040522; ENSMUSG00000020689; ENSMUSG00000041695; ENSMUSG00000044583; ENSMUSG00000004665; ENSMUSG00000005824; ENSMUSG00000025132; ENSMUSG00000033161; ENSMUSG00000006519; ENSMUSG00000028645; ENSMUSG00000039005	70	70
0.000491062	0.00226592	GO:0010712	b	4	regulation of collagen metabolic process	67557; 100952; 74048; 11541; 14219; 16173; 16193; 18787; 20296; 21803; 21809; 22352; 216869; 26427	ENSMUSG00000026728; ENSMUSG00000039217; ENSMUSG00000034839; ENSMUSG00000037411; ENSMUSG00000021253; ENSMUSG00000020101; ENSMUSG00000035385; ENSMUSG00000025746; ENSMUSG00000002603; ENSMUSG00000019997; ENSMUSG00000060216; ENSMUSG00000027230; ENSMUSG00000018500; ENSMUSG00000029163	52	52
0.000497696	0.00228873	GO:0031670	b	4	cellular response to nutrient	67972; 70839; 11951; 14456; 237911; 12579; 13057; 13058; 14159; 14276; 14360; 15368; 16846; 19225; 20296; 21923	ENSMUSG00000019843; ENSMUSG00000006057; ENSMUSG00000032487; ENSMUSG00000005413; ENSMUSG00000019943; ENSMUSG00000059201; ENSMUSG00000053158; ENSMUSG00000015340; ENSMUSG00000035385; ENSMUSG00000073802; ENSMUSG00000036353; ENSMUSG00000028364; ENSMUSG00000031451; ENSMUSG00000034329; ENSMUSG00000032725; ENSMUSG00000006519	64	64
0.000510408	0.00233281	GO:0045184	b	4	establishment of protein localization	54563; 21898; 229841; 54725; 66573; 54598; 66824; 230979; 67397; 56807; 67628; 67844; 231834; 68040; 16822; 68278; 84112; 232414; 69146; 69178; 67775; 69608; 102657; 241062; 234396; 71310; 11891; 71607; 71805; 11983; 268973; 170744; 170829; 171285; 105785; 270160; 14456; 12289; 17754; 55991; 106572; 74117; 56079; 23845; 238377; 94353; 74732; 74772; 12481; 140497; 209131; 108000; 12550; 76709; 766…	ENSMUSG00000040249; ENSMUSG00000032939; ENSMUSG00000073678; ENSMUSG00000003873; ENSMUSG00000022831; ENSMUSG00000030774; ENSMUSG00000046295; ENSMUSG00000022150; ENSMUSG00000045328; ENSMUSG00000051998; ENSMUSG00000018654; ENSMUSG00000016529; ENSMUSG00000024511; ENSMUSG00000036438; ENSMUSG00000029616; ENSMUSG00000018965; ENSMUSG00000021948; ENSMUSG00000003779; ENSMUSG00000045322; ENSMUSG00000027843;…	1866	1865
0.000510733	0.00233281	GO:0015031	b	4	protein transport	54563; 21898; 54725; 54598; 66824; 230979; 67397; 56807; 67628; 67844; 231834; 68040; 16822; 68278; 84112; 232414; 69146; 69178; 67775; 69608; 102657; 241062; 234396; 71310; 11891; 71607; 71805; 11983; 268973; 170744; 170829; 171285; 105785; 270160; 14456; 12289; 17754; 55991; 106572; 74117; 56079; 23845; 238377; 94353; 74732; 74772; 12481; 140497; 209131; 108000; 12550; 76709; 76687; 240641; 240…	ENSMUSG00000040249; ENSMUSG00000032939; ENSMUSG00000073678; ENSMUSG00000018965; ENSMUSG00000022831; ENSMUSG00000030774; ENSMUSG00000046295; ENSMUSG00000022150; ENSMUSG00000051998; ENSMUSG00000016529; ENSMUSG00000024511; ENSMUSG00000025351; ENSMUSG00000029616; ENSMUSG00000021948; ENSMUSG00000003779; ENSMUSG00000045322; ENSMUSG00000027843; ENSMUSG00000036943; ENSMUSG00000029923; ENSMUSG00000017146;…	1758	1757
0.000534252	0.00243202	GO:0045471	b	4	response to ethanol	21898; 66713; 394436; 11513; 11668; 11810; 12043; 12370; 12443; 12475; 12534; 13058; 13860; 14360; 15357; 16000; 16846; 17700; 19229; 20296; 20306; 217843; 21923; 22171; 20375; 15446; 21391	ENSMUSG00000020053; ENSMUSG00000002111; ENSMUSG00000028364; ENSMUSG00000059201; ENSMUSG00000053279; ENSMUSG00000031613; ENSMUSG00000026029; ENSMUSG00000019942; ENSMUSG00000089960; ENSMUSG00000070348; ENSMUSG00000026100; ENSMUSG00000029925; ENSMUSG00000015766; ENSMUSG00000019843; ENSMUSG00000020152; ENSMUSG00000035373; ENSMUSG00000021670; ENSMUSG00000015340; ENSMUSG00000040613; ENSMUSG00000021198;…	137	137
0.000557485	0.00252926	GO:0010001	b	4	glial cell differentiation	21898; 11820; 236539; 74117; 74761; 12527; 12759; 12767; 12799; 24088; 13654; 14289; 14733; 15364; 16000; 16176; 16409; 16835; 16971; 17096; 17751; 17926; 17937; 215798; 19271; 216049; 20201; 20202; 20666; 20682; 21803; 211323; 22352; 22388; 56336; 56386; 20720; 224109; 227325; 30948	ENSMUSG00000040249; ENSMUSG00000052384; ENSMUSG00000056758; ENSMUSG00000022892; ENSMUSG00000045382; ENSMUSG00000029070; ENSMUSG00000026249; ENSMUSG00000053398; ENSMUSG00000002603; ENSMUSG00000026697; ENSMUSG00000034220; ENSMUSG00000037868; ENSMUSG00000017929; ENSMUSG00000022037; ENSMUSG00000063632; ENSMUSG00000025402; ENSMUSG00000039005; ENSMUSG00000020053; ENSMUSG00000037855; ENSMUSG00000026728;…	232	232
0.00059859	0.00270667	GO:0051817	b	4	modification of morphology or physiology of other organism involved in symbiotic interaction	12125; 11846; 12306; 12314; 12504; 12631; 12774; 24088; 14825; 15364; 16476; 17869; 17969; 19288; 20302; 20303; 20311; 21803; 22171; 56744; 58217	ENSMUSG00000027995; ENSMUSG00000000982; ENSMUSG00000042265; ENSMUSG00000032231; ENSMUSG00000022346; ENSMUSG00000002603; ENSMUSG00000056201; ENSMUSG00000029380; ENSMUSG00000023274; ENSMUSG00000079227; ENSMUSG00000056758; ENSMUSG00000027381; ENSMUSG00000029373; ENSMUSG00000015950; ENSMUSG00000025747; ENSMUSG00000019987; ENSMUSG00000018930; ENSMUSG00000029371; ENSMUSG00000036438; ENSMUSG00000027832;…	97	97
0.000658215	0.00296636	GO:0090382	b	4	phagosome maturation	67844; 270160; 106572; 74748; 12721; 226421; 18439; 19332	ENSMUSG00000030707; ENSMUSG00000031504; ENSMUSG00000029468; ENSMUSG00000019832; ENSMUSG00000053318; ENSMUSG00000052688; ENSMUSG00000055069; ENSMUSG00000056515	21	21
0.000756508	0.003398	GO:0010038	b	4	response to metal ion	67092; 84112; 11820; 234779; 268697; 74096; 94352; 74772; 12550; 50799; 11465; 11513; 11687; 11690; 11747; 11810; 11846; 12010; 12043; 12259; 12314; 12317; 12443; 12475; 12534; 12925; 13058; 13163; 78830; 13605; 14281; 14913; 15368; 29875; 16193; 81897; 16476; 16478; 16531; 17751; 229731; 17969; 18164; 18439; 18783; 19141; 19225; 19229; 19385; 216343; 20191; 20969; 21825; 56012; 107766; 28240; 54…	ENSMUSG00000006360; ENSMUSG00000045322; ENSMUSG00000056220; ENSMUSG00000032487; ENSMUSG00000000673; ENSMUSG00000040322; ENSMUSG00000009292; ENSMUSG00000071076; ENSMUSG00000060063; ENSMUSG00000022892; ENSMUSG00000036887; ENSMUSG00000005732; ENSMUSG00000036438; ENSMUSG00000052684; ENSMUSG00000002307; ENSMUSG00000041431; ENSMUSG00000027762; ENSMUSG00000020592; ENSMUSG00000019942; ENSMUSG00000070348;…	376	376
0.000829678	0.00371432	GO:0010324	b	4	membrane invagination	105855; 56792; 232201; 497097; 629871; 106572; 238447; 140580; 83433; 629845; 404711; 668218; 11629; 11687; 110785; 14127; 14129; 14130; 14131; 16016; 16019; 16071; 16409; 16414; 16803; 100123473; 17304; 17886; 19261; 20288; 20401; 217303; 20877; 21825; 780931	ENSMUSG00000041112; ENSMUSG00000059498; ENSMUSG00000026656; ENSMUSG00000024397; ENSMUSG00000104876; ENSMUSG00000098112; ENSMUSG00000058715; ENSMUSG00000022443; ENSMUSG00000030047; ENSMUSG00000025044; ENSMUSG00000016024; ENSMUSG00000037902; ENSMUSG00000105906; ENSMUSG00000030605; ENSMUSG00000018924; ENSMUSG00000015947; ENSMUSG00000076677; ENSMUSG00000093894; ENSMUSG00000020897; ENSMUSG00000076617;…	212	199
0.000898801	0.00401049	GO:1900047	b	4	negative regulation of hemostasis	72828; 11747; 12306; 12527; 18590; 18753; 18787; 18792; 19128; 216350; 21825; 20720; 21788	ENSMUSG00000021948; ENSMUSG00000032231; ENSMUSG00000040152; ENSMUSG00000032020; ENSMUSG00000037411; ENSMUSG00000030342; ENSMUSG00000022912; ENSMUSG00000025856; ENSMUSG00000027712; ENSMUSG00000021822; ENSMUSG00000027082; ENSMUSG00000034127; ENSMUSG00000026249	49	49
0.00093782	0.00417083	GO:0038096	b	4	Fc-gamma receptor signaling pathway involved in phagocytosis	14130; 16423; 246177; 19264; 19271	ENSMUSG00000026656; ENSMUSG00000055447; ENSMUSG00000025314; ENSMUSG00000020437; ENSMUSG00000026395	9	9
0.000947434	0.00419977	GO:0010632	b	4	regulation of epithelial cell migration	68792; 72461; 11541; 11601; 11602; 114715; 11745; 12317; 12512; 13036; 14026; 14164; 14172; 14178; 15117; 15200; 15368; 212307; 16000; 16416; 16476; 16952; 18643; 18787; 19141; 19225; 19229; 79221; 20401; 20620; 20682; 21803; 21825; 21939; 384009; 320924; 23790; 78560	ENSMUSG00000027460; ENSMUSG00000032487; ENSMUSG00000024277; ENSMUSG00000021262; ENSMUSG00000017652; ENSMUSG00000031465; ENSMUSG00000025351; ENSMUSG00000018500; ENSMUSG00000052684; ENSMUSG00000024486; ENSMUSG00000029484; ENSMUSG00000061119; ENSMUSG00000018293; ENSMUSG00000022367; ENSMUSG00000036585; ENSMUSG00000031486; ENSMUSG00000057967; ENSMUSG00000027351; ENSMUSG00000004698; ENSMUSG00000003814;…	223	223
0.000953562	0.00421312	GO:0034329	b	4	cell junction assembly	231830; 107581; 12550; 109711; 67451; 11815; 11853; 11854; 11856; 12043; 12527; 12631; 13605; 14086; 14260; 18810; 29875; 16402; 16410; 16416; 16971; 17387; 17926; 18163; 215449; 19229; 19271; 19277; 20194; 20401; 21838; 21894; 21926; 22388; 23790; 63873	ENSMUSG00000040249; ENSMUSG00000030536; ENSMUSG00000022565; ENSMUSG00000052681; ENSMUSG00000036718; ENSMUSG00000000555; ENSMUSG00000031355; ENSMUSG00000040690; ENSMUSG00000014158; ENSMUSG00000026697; ENSMUSG00000032011; ENSMUSG00000022240; ENSMUSG00000002233; ENSMUSG00000024401; ENSMUSG00000027087; ENSMUSG00000027699; ENSMUSG00000030223; ENSMUSG00000030342; ENSMUSG00000056201; ENSMUSG00000044042;…	208	208
0.000975367	0.00429543	GO:0031652	b	4	positive regulation of heat generation	12774; 16176; 19225; 21926; 21934; 21943	ENSMUSG00000032487; ENSMUSG00000026321; ENSMUSG00000022015; ENSMUSG00000024401; ENSMUSG00000027398; ENSMUSG00000079227	13	13
0.0010348	0.00452768	GO:0002540	b	4	leukotriene production involved in inflammatory response	11689; 11690; 18787	ENSMUSG00000037411; ENSMUSG00000025701; ENSMUSG00000060063	3	3
0.0010348	0.00452768	GO:0071226	b	4	cellular response to molecule of fungal origin	12229; 20963; 56644	ENSMUSG00000079293; ENSMUSG00000031264; ENSMUSG00000021457	3	3
0.00115489	0.00503683	GO:0045445	b	4	myoblast differentiation	241075; 12508; 13009; 14562; 15357; 15945; 16000; 16173; 17700; 19664; 20307; 20308; 20682; 20969; 21803; 21926; 211323; 56642; 50930; 228003	ENSMUSG00000021670; ENSMUSG00000020053; ENSMUSG00000051344; ENSMUSG00000039191; ENSMUSG00000000567; ENSMUSG00000039217; ENSMUSG00000002603; ENSMUSG00000040747; ENSMUSG00000062991; ENSMUSG00000030117; ENSMUSG00000026100; ENSMUSG00000030470; ENSMUSG00000019122; ENSMUSG00000075307; ENSMUSG00000034855; ENSMUSG00000024401; ENSMUSG00000005824; ENSMUSG00000020592; ENSMUSG00000009185; ENSMUSG00000025172	95	95
0.00120768	0.00523758	GO:0061515	b	4	myeloid cell development	105855; 101488212; 11308; 234396; 11820; 238377; 11733; 12306; 24088; 15170; 16409; 18718; 21943; 22177; 216984; 80752; 224109; 97086	ENSMUSG00000031543; ENSMUSG00000022488; ENSMUSG00000058835; ENSMUSG00000032231; ENSMUSG00000046295; ENSMUSG00000025854; ENSMUSG00000027995; ENSMUSG00000030786; ENSMUSG00000093938; ENSMUSG00000037994; ENSMUSG00000026737; ENSMUSG00000022015; ENSMUSG00000004266; ENSMUSG00000030579; ENSMUSG00000047415; ENSMUSG00000022892; ENSMUSG00000070354; ENSMUSG00000052384	83	82
0.00120867	0.00523758	GO:0071466	b	4	cellular response to xenobiotic stimulus	394432; 394433; 394435; 232174; 236539; 394430; 394434; 433294; 394436; 433766; 12292; 74777; 11629; 11846; 12373; 12428; 13555; 16193; 17700; 18538; 20191; 20296; 21803; 22236; 20541; 320024; 27384; 94284; 13078; 622402	ENSMUSG00000090124; ENSMUSG00000024397; ENSMUSG00000090145; ENSMUSG00000090175; ENSMUSG00000050989; ENSMUSG00000053398; ENSMUSG00000028834; ENSMUSG00000002603; ENSMUSG00000027861; ENSMUSG00000047343; ENSMUSG00000089960; ENSMUSG00000026100; ENSMUSG00000089943; ENSMUSG00000054640; ENSMUSG00000027698; ENSMUSG00000021313; ENSMUSG00000021213; ENSMUSG00000021211; ENSMUSG00000019987; ENSMUSG00000090171;…	166	166
0.00127418	0.00550381	GO:0035987	b	4	endodermal cell differentiation	12816; 12832; 12833; 12837; 13813; 15364; 16323; 16402; 16410; 17387; 17394	ENSMUSG00000000555; ENSMUSG00000000957; ENSMUSG00000032446; ENSMUSG00000068196; ENSMUSG00000056758; ENSMUSG00000026042; ENSMUSG00000005800; ENSMUSG00000001119; ENSMUSG00000032332; ENSMUSG00000041324; ENSMUSG00000027087	39	39
0.00128074	0.00551453	GO:0043434	b	4	response to peptide hormone	98496; 230514; 67092; 71660; 237542; 106572; 237911; 76267; 231207; 11747; 11810; 11821; 11846; 12322; 12428; 12631; 12702; 13057; 13058; 13654; 14068; 14219; 14360; 14537; 14678; 14784; 29875; 16000; 16153; 16173; 16176; 16193; 16324; 16416; 16478; 16625; 16846; 16952; 17096; 17700; 18430; 18479; 18605; 18751; 18753; 18761; 215449; 19225; 19267; 79221; 20296; 20430; 20525; 53322; 20715; 20716; 2…	ENSMUSG00000035212; ENSMUSG00000059923; ENSMUSG00000021091; ENSMUSG00000071076; ENSMUSG00000032487; ENSMUSG00000014158; ENSMUSG00000016529; ENSMUSG00000024052; ENSMUSG00000030659; ENSMUSG00000030447; ENSMUSG00000031443; ENSMUSG00000019997; ENSMUSG00000052681; ENSMUSG00000020053; ENSMUSG00000026100; ENSMUSG00000006519; ENSMUSG00000021948; ENSMUSG00000032562; ENSMUSG00000010663; ENSMUSG00000002603;…	433	433
0.0013058	0.00560138	GO:0120036	b	4	plasma membrane bounded cell projection organization	105855; 66573; 66713; 56792; 67263; 264134; 16765; 11308; 231830; 68169; 68588; 68743; 68802; 232975; 233781; 70415; 70839; 11820; 103765; 104252; 235379; 11951; 399558; 277360; 236539; 72832; 241568; 73341; 100048534; 270120; 73710; 17754; 74117; 140570; 76709; 67220; 75974; 109242; 240641; 76884; 11461; 11535; 11629; 11658; 11815; 11854; 12010; 12043; 12322; 54712; 12399; 12484; 12505; 241950; …	ENSMUSG00000033721; ENSMUSG00000040249; ENSMUSG00000018965; ENSMUSG00000048251; ENSMUSG00000029516; ENSMUSG00000026656; ENSMUSG00000039145; ENSMUSG00000015829; ENSMUSG00000021262; ENSMUSG00000074785; ENSMUSG00000030447; ENSMUSG00000056071; ENSMUSG00000028438; ENSMUSG00000052397; ENSMUSG00000037405; ENSMUSG00000021948; ENSMUSG00000026249; ENSMUSG00000028613; ENSMUSG00000026697; ENSMUSG00000040907;…	1528	1527
0.00132577	0.00560138	GO:0002238	b	4	response to molecule of fungal origin	12229; 24088; 20963; 56644	ENSMUSG00000079293; ENSMUSG00000027995; ENSMUSG00000031264; ENSMUSG00000021457	6	6
0.00132577	0.00560138	GO:0000912	b	4	assembly of actomyosin apparatus involved in cytokinesis	68743; 71819; 13605; 26934	ENSMUSG00000027699; ENSMUSG00000032254; ENSMUSG00000023015; ENSMUSG00000036777	6	6
0.00132577	0.00560138	GO:0000915	b	4	actomyosin contractile ring assembly	68743; 71819; 13605; 26934	ENSMUSG00000027699; ENSMUSG00000032254; ENSMUSG00000023015; ENSMUSG00000036777	6	6
0.00132577	0.00560138	GO:0000022	b	4	mitotic spindle elongation	71819; 16571; 20877; 26934	ENSMUSG00000020897; ENSMUSG00000032254; ENSMUSG00000023015; ENSMUSG00000034311	6	6
0.00132577	0.00560138	GO:0010911	b	4	regulation of isomerase activity	215387; 16409; 22038; 257632	ENSMUSG00000030786; ENSMUSG00000034906; ENSMUSG00000032369; ENSMUSG00000055994	6	6
0.00133547	0.0056248	GO:0007520	b	4	myoblast fusion	226101; 12292; 67220; 12362; 12508; 15945; 16190; 17886; 18019; 20307; 23886; 50930	ENSMUSG00000025888; ENSMUSG00000038508; ENSMUSG00000026407; ENSMUSG00000040747; ENSMUSG00000027544; ENSMUSG00000009185; ENSMUSG00000030748; ENSMUSG00000048612; ENSMUSG00000034855; ENSMUSG00000005824; ENSMUSG00000022443; ENSMUSG00000015745	45	45
0.001355	0.00568931	GO:0006022	b	4	aminoglycan metabolic process	68169; 232984; 233781; 234356; 235534; 12655; 12111; 12505; 15116; 15117; 15211; 15212; 15234; 16176; 21803; 56336; 319901; 53625; 60322; 97440; 212898	ENSMUSG00000037347; ENSMUSG00000031375; ENSMUSG00000005087; ENSMUSG00000028864; ENSMUSG00000069920; ENSMUSG00000051650; ENSMUSG00000038702; ENSMUSG00000022367; ENSMUSG00000059479; ENSMUSG00000043587; ENSMUSG00000003665; ENSMUSG00000040809; ENSMUSG00000036356; ENSMUSG00000021665; ENSMUSG00000017929; ENSMUSG00000025232; ENSMUSG00000002603; ENSMUSG00000027398; ENSMUSG00000039497; ENSMUSG00000030657;…	103	103
0.00139881	0.00585507	GO:0032984	b	4	protein-containing complex disassembly	16765; 50874; 70218; 80986; 171580; 17754; 73420; 76709; 109242; 12332; 12631; 13860; 14026; 14168; 56193; 16800; 17318; 17869; 17886; 19888; 20401; 20739; 20947; 73804; 21926; 22003; 211323; 22351; 22388; 319162; 320502; 58522; 381293; 93677; 23999; 63873; 228421	ENSMUSG00000006304; ENSMUSG00000062077; ENSMUSG00000029683; ENSMUSG00000023277; ENSMUSG00000021262; ENSMUSG00000028438; ENSMUSG00000022443; ENSMUSG00000035299; ENSMUSG00000022346; ENSMUSG00000019823; ENSMUSG00000028678; ENSMUSG00000026532; ENSMUSG00000041498; ENSMUSG00000015766; ENSMUSG00000024401; ENSMUSG00000027115; ENSMUSG00000027254; ENSMUSG00000028059; ENSMUSG00000031015; ENSMUSG00000031137;…	220	220
0.00156134	0.00649517	GO:0000212	b	4	meiotic spindle organization	67141; 105988; 12316; 17886; 20878; 54204	ENSMUSG00000000486; ENSMUSG00000027496; ENSMUSG00000058290; ENSMUSG00000022443; ENSMUSG00000033952; ENSMUSG00000019773	14	14
0.00156134	0.00649517	GO:0000076	b	4	DNA replication checkpoint	67177; 77011; 269582; 18392; 23834; 327762	ENSMUSG00000017499; ENSMUSG00000046591; ENSMUSG00000028587; ENSMUSG00000042489; ENSMUSG00000036875; ENSMUSG00000006585	14	14
0.00161936	0.00671585	GO:0007292	b	4	female gamete generation	67141; 69716; 268697; 12043; 12316; 14283; 215387; 15212; 16000; 16323; 16324; 16846; 17687; 68549; 18783; 18792; 18817; 67121; 19225; 19229; 19288; 20878; 21930; 21973; 22137; 15446; 54204	ENSMUSG00000000486; ENSMUSG00000021665; ENSMUSG00000038379; ENSMUSG00000056220; ENSMUSG00000032487; ENSMUSG00000059201; ENSMUSG00000034906; ENSMUSG00000031613; ENSMUSG00000024912; ENSMUSG00000027832; ENSMUSG00000041431; ENSMUSG00000020914; ENSMUSG00000030867; ENSMUSG00000026779; ENSMUSG00000021822; ENSMUSG00000033952; ENSMUSG00000019773; ENSMUSG00000020053; ENSMUSG00000021569; ENSMUSG00000037035;…	147	147
0.00165287	0.00683387	GO:0008015	b	4	blood circulation	84112; 232975; 69178; 140781; 72054; 72461; 14456; 12289; 76757; 240672; 11486; 67451; 12843; 11535; 11541; 109934; 11689; 11928; 12267; 12290; 12314; 12373; 12767; 12873; 13009; 13057; 13506; 14067; 14219; 14226; 14528; 14678; 15200; 15357; 15368; 15464; 15559; 15894; 16173; 16518; 16531; 16846; 17868; 17897; 17906; 17970; 18162; 18430; 19204; 19225; 19271; 19277; 52150; 20191; 21957; 20303; 218…	ENSMUSG00000020635; ENSMUSG00000013936; ENSMUSG00000037580; ENSMUSG00000053093; ENSMUSG00000032487; ENSMUSG00000014158; ENSMUSG00000059201; ENSMUSG00000027423; ENSMUSG00000030790; ENSMUSG00000052821; ENSMUSG00000041695; ENSMUSG00000027861; ENSMUSG00000046410; ENSMUSG00000045382; ENSMUSG00000019997; ENSMUSG00000036438; ENSMUSG00000056529; ENSMUSG00000017631; ENSMUSG00000018500; ENSMUSG00000006519;…	488	487
0.00167036	0.00688515	GO:0061082	b	4	myeloid leukocyte cytokine production	21898; 14456; 100689; 24088; 14127; 14991; 15368; 21803; 21809	ENSMUSG00000005413; ENSMUSG00000027995; ENSMUSG00000021253; ENSMUSG00000037379; ENSMUSG00000031451; ENSMUSG00000016206; ENSMUSG00000058715; ENSMUSG00000002603; ENSMUSG00000039005	29	29
0.0017195	0.00706615	GO:0070391	b	4	response to lipoteichoic acid	21898; 83433; 12475; 24088; 16803	ENSMUSG00000051439; ENSMUSG00000023992; ENSMUSG00000027995; ENSMUSG00000016024; ENSMUSG00000039005	10	10
0.00188571	0.0077257	GO:0033198	b	4	response to ATP	70839; 234779; 55991; 12362; 16176; 18439; 19225; 20296; 20343; 20541	ENSMUSG00000054640; ENSMUSG00000025888; ENSMUSG00000029468; ENSMUSG00000032487; ENSMUSG00000031934; ENSMUSG00000035385; ENSMUSG00000036353; ENSMUSG00000026581; ENSMUSG00000034330; ENSMUSG00000027398	35	35
0.00205051	0.00837551	GO:0055085	b	4	transmembrane transport	98496; 50934; 229933; 27405; 66395; 66815; 66868; 240638; 67972; 68460; 331004; 232975; 233246; 69810; 70357; 70839; 234779; 103710; 110895; 71279; 11951; 71912; 104681; 11987; 170829; 433294; 236727; 433470; 269717; 14456; 237542; 12289; 12292; 55991; 73822; 74096; 74152; 74513; 74772; 74777; 50799; 110880; 233571; 76408; 72828; 171166; 76757; 78339; 11461; 11745; 11747; 11829; 11928; 12028; 120…	ENSMUSG00000003873; ENSMUSG00000045322; ENSMUSG00000048677; ENSMUSG00000027861; ENSMUSG00000020865; ENSMUSG00000018507; ENSMUSG00000036438; ENSMUSG00000009731; ENSMUSG00000050989; ENSMUSG00000021948; ENSMUSG00000028931; ENSMUSG00000027843; ENSMUSG00000040907; ENSMUSG00000032548; ENSMUSG00000024270; ENSMUSG00000001986; ENSMUSG00000047343; ENSMUSG00000036960; ENSMUSG00000028583; ENSMUSG00000015968;…	1489	1488
0.00238082	0.00966628	GO:0031650	b	4	regulation of heat generation	12774; 16176; 19225; 21926; 21934; 21943	ENSMUSG00000032487; ENSMUSG00000026321; ENSMUSG00000022015; ENSMUSG00000024401; ENSMUSG00000027398; ENSMUSG00000079227	15	15
0.00238082	0.00966628	GO:0007076	b	4	mitotic chromosome condensation	70099; 108907; 67849; 14211; 215387; 54392	ENSMUSG00000028312; ENSMUSG00000034349; ENSMUSG00000027306; ENSMUSG00000034906; ENSMUSG00000024791; ENSMUSG00000015880	15	15
0.00240977	0.00975453	GO:0007399	b	4	nervous system development	225872; 21898; 105855; 54722; 54725; 13051; 66713; 56792; 67263; 264134; 67628; 16765; 11308; 104156; 67972; 231830; 231871; 68169; 68588; 68792; 68802; 232975; 66190; 233781; 241062; 332397; 70415; 70839; 11820; 235379; 11951; 71877; 399558; 277360; 72324; 236539; 12125; 72832; 12140; 241568; 270120; 14456; 73710; 17754; 270685; 74117; 12393; 12394; 74761; 74762; 140570; 108000; 12550; 171166; 2…	ENSMUSG00000040249; ENSMUSG00000038151; ENSMUSG00000073678; ENSMUSG00000003873; ENSMUSG00000048251; ENSMUSG00000029516; ENSMUSG00000022150; ENSMUSG00000037313; ENSMUSG00000015829; ENSMUSG00000021665; ENSMUSG00000032011; ENSMUSG00000023805; ENSMUSG00000021262; ENSMUSG00000027381; ENSMUSG00000051650; ENSMUSG00000030447; ENSMUSG00000056071; ENSMUSG00000014158; ENSMUSG00000018507; ENSMUSG00000017631;…	2373	2371
0.00242125	0.00977172	GO:0048305	b	4	immunoglobulin secretion	240754; 12483; 15040; 16193; 18987; 21926; 21939; 57914	ENSMUSG00000051998; ENSMUSG00000033467; ENSMUSG00000067212; ENSMUSG00000025746; ENSMUSG00000017652; ENSMUSG00000024401; ENSMUSG00000030577; ENSMUSG00000008496	25	25
0.00243998	0.00981802	GO:0051341	b	4	regulation of oxidoreductase activity	74748; 11605; 12314; 12802; 13057; 14528; 14678; 14938; 15439; 15559; 16176; 16846; 17751; 18162; 19229; 21926; 56532; 257632	ENSMUSG00000024401; ENSMUSG00000022206; ENSMUSG00000023132; ENSMUSG00000031266; ENSMUSG00000037580; ENSMUSG00000032562; ENSMUSG00000031722; ENSMUSG00000055994; ENSMUSG00000059201; ENSMUSG00000053318; ENSMUSG00000022221; ENSMUSG00000059456; ENSMUSG00000027398; ENSMUSG00000036438; ENSMUSG00000031760; ENSMUSG00000062585; ENSMUSG00000026228; ENSMUSG00000006519	87	87
0.00254028	0.0101913	GO:0002577	b	4	regulation of antigen processing and presentation	66824; 83433; 18173; 19260; 21825; 22376; 257632	ENSMUSG00000027843; ENSMUSG00000040152; ENSMUSG00000031165; ENSMUSG00000055994; ENSMUSG00000030793; ENSMUSG00000026177; ENSMUSG00000023992	20	20
0.00272345	0.0108938	GO:0034332	b	4	adherens junction organization	107581; 12550; 109711; 67451; 11815; 11854; 11856; 12043; 12631; 14260; 29875; 212307; 16410; 16971; 17387; 17926; 18223; 19229; 19271; 20194; 21838; 235442; 23790	ENSMUSG00000040249; ENSMUSG00000026697; ENSMUSG00000030536; ENSMUSG00000031355; ENSMUSG00000040690; ENSMUSG00000024277; ENSMUSG00000032011; ENSMUSG00000036943; ENSMUSG00000063160; ENSMUSG00000027087; ENSMUSG00000056201; ENSMUSG00000044042; ENSMUSG00000004530; ENSMUSG00000041845; ENSMUSG00000000957; ENSMUSG00000041957; ENSMUSG00000000303; ENSMUSG00000025314; ENSMUSG00000059456; ENSMUSG00000057329;…	123	123
0.00284531	0.0113143	GO:0090306	b	4	spindle assembly involved in meiosis	67141; 12316; 20878; 54204	ENSMUSG00000033952; ENSMUSG00000027496; ENSMUSG00000000486; ENSMUSG00000019773	7	7
0.00284531	0.0113143	GO:0034238	b	4	macrophage fusion	83433; 12505; 22177; 75766	ENSMUSG00000023992; ENSMUSG00000005087; ENSMUSG00000030579; ENSMUSG00000022303	7	7
0.00289072	0.0114612	GO:0070943	b	4	neutrophil mediated killing of symbiont cell	11846; 14825; 17969; 20311; 58217	ENSMUSG00000029371; ENSMUSG00000019987; ENSMUSG00000029380; ENSMUSG00000042265; ENSMUSG00000015950	11	11
0.00316014	0.0124927	GO:0046683	b	4	response to organophosphorus	69263; 70839; 11820; 234779; 50490; 55991; 233571; 12362; 14281; 14283; 16176; 16476; 16478; 18439; 215449; 19204; 19225; 19229; 20296; 20343; 20969; 22171; 22350; 20541; 30955	ENSMUSG00000071076; ENSMUSG00000032487; ENSMUSG00000020573; ENSMUSG00000022892; ENSMUSG00000052681; ENSMUSG00000056529; ENSMUSG00000024912; ENSMUSG00000052684; ENSMUSG00000033970; ENSMUSG00000030562; ENSMUSG00000036353; ENSMUSG00000054640; ENSMUSG00000020592; ENSMUSG00000048779; ENSMUSG00000052397; ENSMUSG00000029468; ENSMUSG00000021250; ENSMUSG00000034330; ENSMUSG00000026581; ENSMUSG00000027398;…	139	139
0.0031911	0.0125418	GO:0090077	b	4	foam cell differentiation	12977; 16173; 16410; 16416; 20288; 20652; 56744; 11307	ENSMUSG00000025044; ENSMUSG00000014599; ENSMUSG00000039217; ENSMUSG00000029373; ENSMUSG00000024030; ENSMUSG00000026600; ENSMUSG00000027087; ENSMUSG00000020689	26	26
0.0031911	0.0125418	GO:0036120	b	4	cellular response to platelet-derived growth factor stimulus	76709; 12428; 14360; 15116; 15117; 29875; 16416; 20296	ENSMUSG00000006304; ENSMUSG00000027715; ENSMUSG00000022367; ENSMUSG00000003665; ENSMUSG00000035385; ENSMUSG00000030536; ENSMUSG00000019843; ENSMUSG00000020689	26	26
0.00322701	0.0126461	GO:0030278	b	4	regulation of ossification	67141; 67399; 231633; 68588; 102657; 215653; 12393; 140780; 12043; 12768; 12977; 13654; 15951; 16000; 114584; 16478; 16905; 18022; 18439; 18605; 19229; 19664; 20354; 20666; 20682; 21803; 21809; 21926; 14588; 56401; 20541; 80752; 26427; 100038882; 228357	ENSMUSG00000028063; ENSMUSG00000058794; ENSMUSG00000071076; ENSMUSG00000021451; ENSMUSG00000025854; ENSMUSG00000028641; ENSMUSG00000054640; ENSMUSG00000021493; ENSMUSG00000002603; ENSMUSG00000027230; ENSMUSG00000035914; ENSMUSG00000027316; ENSMUSG00000037868; ENSMUSG00000024401; ENSMUSG00000027339; ENSMUSG00000027253; ENSMUSG00000063632; ENSMUSG00000019773; ENSMUSG00000020053; ENSMUSG00000029468;…	215	215
0.00326459	0.0127564	GO:0060491	b	4	regulation of cell projection assembly	66573; 56792; 68743; 70839; 104943; 104252; 74117; 76709; 75974; 12631; 13860; 14026; 14086; 15894; 213575; 17700; 18439; 18643; 18753; 18761; 19354; 19888; 20430; 21809; 54670; 22240; 22376; 56212; 23790; 28240; 23999; 228003	ENSMUSG00000030447; ENSMUSG00000006304; ENSMUSG00000031165; ENSMUSG00000009292; ENSMUSG00000021262; ENSMUSG00000036777; ENSMUSG00000045664; ENSMUSG00000037405; ENSMUSG00000024253; ENSMUSG00000018293; ENSMUSG00000026100; ENSMUSG00000026778; ENSMUSG00000015766; ENSMUSG00000036353; ENSMUSG00000029468; ENSMUSG00000021253; ENSMUSG00000056201; ENSMUSG00000021948; ENSMUSG00000004530; ENSMUSG00000029254;…	192	192
0.00333488	0.0129935	GO:0001501	b	4	skeletal system development	54725; 231633; 11308; 232174; 69480; 233781; 234356; 110075; 268396; 215653; 12292; 270685; 12393; 12394; 74511; 238377; 94352; 12843; 12306; 12399; 12816; 12832; 12833; 12834; 12835; 13003; 13038; 14048; 14172; 14191; 14219; 14260; 14562; 15117; 15170; 15211; 15212; 15364; 16000; 212712; 16846; 16854; 17132; 17386; 17387; 17869; 17926; 17937; 18162; 18439; 18590; 18718; 18933; 19264; 216616; 203…	ENSMUSG00000025932; ENSMUSG00000021665; ENSMUSG00000048126; ENSMUSG00000020241; ENSMUSG00000022367; ENSMUSG00000059201; ENSMUSG00000025854; ENSMUSG00000038331; ENSMUSG00000025856; ENSMUSG00000026737; ENSMUSG00000030117; ENSMUSG00000056758; ENSMUSG00000035493; ENSMUSG00000063415; ENSMUSG00000025747; ENSMUSG00000019997; ENSMUSG00000021451; ENSMUSG00000030657; ENSMUSG00000029468; ENSMUSG00000022015;…	526	526
0.00337107	0.0130968	GO:0031214	b	4	biomineral tissue development	67141; 231633; 102657; 14456; 140780; 11605; 11687; 12306; 12768; 14191; 16000; 16846; 17386; 18022; 18439; 18605; 19225; 19229; 20682; 20750; 21803; 21809; 22156; 20541; 80752; 58994; 93695; 100038882	ENSMUSG00000058794; ENSMUSG00000031266; ENSMUSG00000032487; ENSMUSG00000059201; ENSMUSG00000025854; ENSMUSG00000029304; ENSMUSG00000005968; ENSMUSG00000002603; ENSMUSG00000035914; ENSMUSG00000018924; ENSMUSG00000029816; ENSMUSG00000031906; ENSMUSG00000054640; ENSMUSG00000019773; ENSMUSG00000020053; ENSMUSG00000029468; ENSMUSG00000025804; ENSMUSG00000021253; ENSMUSG00000031451; ENSMUSG00000037370;…	162	162
0.00348593	0.0135042	GO:0033631	b	4	cell-cell adhesion mediated by integrin	108101; 11486; 78473; 12484; 16402; 20947	ENSMUSG00000000555; ENSMUSG00000031015; ENSMUSG00000057058; ENSMUSG00000017697; ENSMUSG00000047139; ENSMUSG00000024965	16	16
0.00382549	0.0147048	GO:0002442	b	4	serotonin secretion involved in inflammatory response	14127; 217303; 20963	ENSMUSG00000058715; ENSMUSG00000034652; ENSMUSG00000021457	4	4
0.00382549	0.0147048	GO:0002232	b	4	leukocyte chemotaxis involved in inflammatory response	74748; 16803; 233079	ENSMUSG00000051314; ENSMUSG00000016024; ENSMUSG00000053318	4	4
0.00382846	0.0147048	GO:0006643	b	4	membrane lipid metabolic process	66775; 100340; 66190; 100503915; 241062; 11886; 74442; 11605; 12028; 241447; 13244; 14347; 14421; 15211; 15212; 81535; 18439; 18753; 20698; 22234; 56336; 56386; 58994; 26877; 239559; 26889; 54325; 223753; 13078	ENSMUSG00000021665; ENSMUSG00000073678; ENSMUSG00000031266; ENSMUSG00000003873; ENSMUSG00000034780; ENSMUSG00000021948; ENSMUSG00000028885; ENSMUSG00000036587; ENSMUSG00000017929; ENSMUSG00000031906; ENSMUSG00000047878; ENSMUSG00000006731; ENSMUSG00000029468; ENSMUSG00000050931; ENSMUSG00000071724; ENSMUSG00000056124; ENSMUSG00000035891; ENSMUSG00000031591; ENSMUSG00000030760; ENSMUSG00000061878;…	171	171
0.00403413	0.0154508	GO:1901888	b	4	regulation of cell junction assembly	107581; 67451; 11815; 11854; 11856; 12631; 14260; 29875; 16971; 17387; 17926; 215449; 19271; 20194; 21838; 21926; 23790	ENSMUSG00000041957; ENSMUSG00000040249; ENSMUSG00000031355; ENSMUSG00000040690; ENSMUSG00000026697; ENSMUSG00000056201; ENSMUSG00000000957; ENSMUSG00000044042; ENSMUSG00000032011; ENSMUSG00000041959; ENSMUSG00000022548; ENSMUSG00000004530; ENSMUSG00000025314; ENSMUSG00000041845; ENSMUSG00000030536; ENSMUSG00000024401; ENSMUSG00000052681	84	84
0.00413826	0.0157604	GO:0045780	b	4	positive regulation of bone resorption	11501; 16416; 246256; 20750; 20963; 21934; 21943; 75766	ENSMUSG00000022015; ENSMUSG00000025473; ENSMUSG00000026321; ENSMUSG00000022303; ENSMUSG00000021457; ENSMUSG00000029304; ENSMUSG00000059089; ENSMUSG00000020689	27	27
0.00413826	0.0157604	GO:0043501	b	4	skeletal muscle adaptation	140781; 12292; 76469; 17700; 17926; 21955; 59006; 59011	ENSMUSG00000053093; ENSMUSG00000026407; ENSMUSG00000026697; ENSMUSG00000026100; ENSMUSG00000047419; ENSMUSG00000064179; ENSMUSG00000028116; ENSMUSG00000068697	27	27
0.00438286	0.0165984	GO:0001706	b	4	endoderm formation	12816; 12832; 12833; 12837; 13813; 15364; 16323; 16402; 16410; 17387; 17394	ENSMUSG00000000555; ENSMUSG00000000957; ENSMUSG00000032446; ENSMUSG00000068196; ENSMUSG00000056758; ENSMUSG00000026042; ENSMUSG00000005800; ENSMUSG00000001119; ENSMUSG00000032332; ENSMUSG00000041324; ENSMUSG00000027087	45	45
0.00438286	0.0165984	GO:0043029	b	4	T cell homeostasis	105855; 12125; 12028; 12043; 12442; 12484; 12721; 18439; 21803; 56532; 58801	ENSMUSG00000030707; ENSMUSG00000022488; ENSMUSG00000022221; ENSMUSG00000003873; ENSMUSG00000002603; ENSMUSG00000057329; ENSMUSG00000024521; ENSMUSG00000027381; ENSMUSG00000047139; ENSMUSG00000032218; ENSMUSG00000029468	45	45
0.00441496	0.0166733	GO:0003015	b	4	heart process	232975; 140781; 50490; 12289; 76757; 11486; 67451; 11535; 11928; 12290; 12314; 12373; 12767; 13009; 13506; 14219; 14226; 14360; 14528; 14678; 15200; 15464; 16518; 17868; 17897; 17906; 20191; 21957; 21953; 21955; 22003; 23828; 24053; 20541; 192176; 30948	ENSMUSG00000020635; ENSMUSG00000013936; ENSMUSG00000037580; ENSMUSG00000053093; ENSMUSG00000030790; ENSMUSG00000041695; ENSMUSG00000045382; ENSMUSG00000019997; ENSMUSG00000036438; ENSMUSG00000030562; ENSMUSG00000024486; ENSMUSG00000040907; ENSMUSG00000035296; ENSMUSG00000027861; ENSMUSG00000024331; ENSMUSG00000061723; ENSMUSG00000038239; ENSMUSG00000015968; ENSMUSG00000004110; ENSMUSG00000054640;…	227	227
0.00449318	0.0169214	GO:0044364	b	4	disruption of cells of other organism	12125; 11846; 12774; 14825; 17969; 20296; 20311; 56744; 319184; 58217	ENSMUSG00000042265; ENSMUSG00000035385; ENSMUSG00000029380; ENSMUSG00000027381; ENSMUSG00000015950; ENSMUSG00000062727; ENSMUSG00000019987; ENSMUSG00000029371; ENSMUSG00000079227; ENSMUSG00000029373	40	39
0.00451916	0.0169249	GO:0007492	b	4	endoderm development	11601; 11602; 12816; 12832; 12833; 12837; 13813; 14562; 15242; 15364; 16323; 16402; 16410; 17387; 17394; 21803	ENSMUSG00000030117; ENSMUSG00000027460; ENSMUSG00000000555; ENSMUSG00000002603; ENSMUSG00000000957; ENSMUSG00000032446; ENSMUSG00000068196; ENSMUSG00000056758; ENSMUSG00000024986; ENSMUSG00000026042; ENSMUSG00000041324; ENSMUSG00000001119; ENSMUSG00000032332; ENSMUSG00000031465; ENSMUSG00000027087; ENSMUSG00000005800	78	78
0.00451916	0.0169249	GO:0051881	b	4	regulation of mitochondrial membrane potential	98496; 11951; 11983; 12028; 12043; 12122; 12362; 209488; 114584; 17869; 17926; 18439; 22228; 56772; 58801; 65106	ENSMUSG00000035199; ENSMUSG00000025888; ENSMUSG00000006057; ENSMUSG00000054428; ENSMUSG00000029468; ENSMUSG00000022346; ENSMUSG00000057329; ENSMUSG00000026697; ENSMUSG00000024521; ENSMUSG00000053192; ENSMUSG00000045658; ENSMUSG00000004446; ENSMUSG00000007041; ENSMUSG00000033685; ENSMUSG00000062007; ENSMUSG00000003873	78	78
0.00454533	0.0169759	GO:0007100	b	4	mitotic centrosome separation	12649; 16551; 18005; 19385; 20878	ENSMUSG00000026622; ENSMUSG00000005732; ENSMUSG00000032113; ENSMUSG00000012443; ENSMUSG00000027496	12	12
0.00476298	0.0177398	GO:0060537	b	4	muscle tissue development	232174; 233199; 140781; 268697; 72330; 241431; 433294; 50490; 12292; 74777; 108000; 67451; 12043; 12317; 12370; 667772; 12534; 12823; 13009; 13654; 13813; 14048; 14049; 14164; 14200; 14281; 14733; 15357; 16000; 16905; 17133; 17700; 17868; 17869; 17897; 17906; 17907; 17930; 18175; 18479; 11910; 19378; 19664; 79221; 20191; 20666; 20682; 21803; 22003; 211323; 22402; 22437; 216869; 23828; 24053; 2054…	ENSMUSG00000025932; ENSMUSG00000013936; ENSMUSG00000005124; ENSMUSG00000053093; ENSMUSG00000028063; ENSMUSG00000020053; ENSMUSG00000013584; ENSMUSG00000034220; ENSMUSG00000063415; ENSMUSG00000030672; ENSMUSG00000036585; ENSMUSG00000030562; ENSMUSG00000031461; ENSMUSG00000068697; ENSMUSG00000050989; ENSMUSG00000041431; ENSMUSG00000022346; ENSMUSG00000027022; ENSMUSG00000019942; ENSMUSG00000032446;…	449	449
0.00485942	0.0180493	GO:0031102	b	4	neuron projection regeneration	233781; 11535; 11815; 12043; 14226; 15234; 16476; 16971; 237847; 18933; 21838; 21923; 21960; 27528	ENSMUSG00000040249; ENSMUSG00000020635; ENSMUSG00000045287; ENSMUSG00000042834; ENSMUSG00000026586; ENSMUSG00000057329; ENSMUSG00000015829; ENSMUSG00000030790; ENSMUSG00000028864; ENSMUSG00000022548; ENSMUSG00000032011; ENSMUSG00000028364; ENSMUSG00000030657; ENSMUSG00000052684	65	65
0.00493105	0.0180672	GO:0051852	b	4	disruption by host of symbiont cells	11846; 14825; 17969; 20311; 56744; 58217	ENSMUSG00000042265; ENSMUSG00000029380; ENSMUSG00000015950; ENSMUSG00000019987; ENSMUSG00000029371; ENSMUSG00000029373	17	17
0.00493105	0.0180672	GO:0051873	b	4	killing by host of symbiont cells	11846; 14825; 17969; 20311; 56744; 58217	ENSMUSG00000042265; ENSMUSG00000029380; ENSMUSG00000015950; ENSMUSG00000019987; ENSMUSG00000029371; ENSMUSG00000029373	17	17
0.00493105	0.0180672	GO:0070293	b	4	renal absorption	14456; 11829; 15117; 80884; 100503085; 26941	ENSMUSG00000022367; ENSMUSG00000014164; ENSMUSG00000025268; ENSMUSG00000031451; ENSMUSG00000020733; ENSMUSG00000024411	17	17
0.00493105	0.0180672	GO:0051284	b	4	positive regulation of sequestering of calcium ion	76757; 12314; 12373; 14226; 20191; 21803	ENSMUSG00000020635; ENSMUSG00000002603; ENSMUSG00000027861; ENSMUSG00000021313; ENSMUSG00000019787; ENSMUSG00000036438	17	17
0.00493105	0.0180672	GO:0001771	b	4	immunological synapse formation	171285; 94176; 12511; 16854; 17698; 93675	ENSMUSG00000050335; ENSMUSG00000020399; ENSMUSG00000030365; ENSMUSG00000031207; ENSMUSG00000020143; ENSMUSG00000024670	17	17
0.00518036	0.0189293	GO:0048678	b	4	response to axon injury	233781; 70839; 11629; 11815; 11846; 12028; 12043; 12534; 14226; 16476; 16971; 17096; 237847; 21923; 21960; 22240; 27528	ENSMUSG00000024501; ENSMUSG00000040249; ENSMUSG00000020635; ENSMUSG00000045287; ENSMUSG00000003873; ENSMUSG00000042834; ENSMUSG00000028364; ENSMUSG00000057329; ENSMUSG00000019942; ENSMUSG00000022548; ENSMUSG00000015829; ENSMUSG00000036353; ENSMUSG00000024397; ENSMUSG00000019987; ENSMUSG00000030657; ENSMUSG00000042228; ENSMUSG00000052684	86	86
0.00523584	0.0189782	GO:0043320	b	4	natural killer cell degranulation	70450; 11891; 74732; 12721	ENSMUSG00000030707; ENSMUSG00000039232; ENSMUSG00000032202; ENSMUSG00000057948	8	8
0.00523584	0.0189782	GO:0043101	b	4	purine-containing compound salvage	229665; 11486; 11821; 15452	ENSMUSG00000017697; ENSMUSG00000025630; ENSMUSG00000070385; ENSMUSG00000006589	8	8
0.00523584	0.0189782	GO:0035696	b	4	monocyte extravasation	270152; 12772; 16423; 19261	ENSMUSG00000037902; ENSMUSG00000055447; ENSMUSG00000048534; ENSMUSG00000049103	8	8
0.00528787	0.0191155	GO:0002360	b	4	T cell lineage commitment	12043; 16193; 16196; 16950; 17085; 53314; 20737; 21803	ENSMUSG00000040329; ENSMUSG00000034266; ENSMUSG00000000693; ENSMUSG00000002603; ENSMUSG00000057329; ENSMUSG00000004707; ENSMUSG00000051457; ENSMUSG00000025746	28	28
0.00530452	0.0191246	GO:0002244	b	4	hematopoietic progenitor cell differentiation	67138; 68743; 234396; 71988; 104759; 12394; 12043; 12978; 14255; 15170; 16323; 56193; 16498; 17285; 17349; 19261; 19264; 53314; 21803; 21973; 219144; 80287; 23828; 20375; 57916; 58994	ENSMUSG00000052160; ENSMUSG00000002111; ENSMUSG00000046295; ENSMUSG00000043157; ENSMUSG00000036777; ENSMUSG00000009585; ENSMUSG00000010142; ENSMUSG00000028931; ENSMUSG00000034266; ENSMUSG00000004266; ENSMUSG00000002603; ENSMUSG00000024621; ENSMUSG00000020914; ENSMUSG00000042817; ENSMUSG00000031906; ENSMUSG00000022952; ENSMUSG00000022034; ENSMUSG00000026395; ENSMUSG00000029798; ENSMUSG00000057329;…	152	152
0.00550615	0.0197987	GO:0044818	b	4	mitotic G2/M transition checkpoint	330177; 77011; 269582; 12189; 12534; 15364; 17193; 18392; 23834	ENSMUSG00000017499; ENSMUSG00000046591; ENSMUSG00000030322; ENSMUSG00000061288; ENSMUSG00000019942; ENSMUSG00000056758; ENSMUSG00000028587; ENSMUSG00000042489; ENSMUSG00000017146	34	34
0.005769	0.0206888	GO:0051828	b	4	entry into other organism involved in symbiotic interaction	66141; 66848; 71740; 14456; 23845; 12504; 16410; 16416; 246746; 18453; 19288; 20128; 217305; 66949; 26362	ENSMUSG00000025492; ENSMUSG00000047798; ENSMUSG00000029915; ENSMUSG00000034317; ENSMUSG00000023274; ENSMUSG00000002602; ENSMUSG00000006411; ENSMUSG00000019810; ENSMUSG00000027832; ENSMUSG00000030921; ENSMUSG00000031451; ENSMUSG00000025130; ENSMUSG00000034641; ENSMUSG00000027087; ENSMUSG00000020689	73	73
0.00580568	0.0207653	GO:0045926	b	4	negative regulation of growth	68567; 69550; 71839; 74117; 12043; 12631; 12774; 231507; 12955; 13132; 24088; 14199; 237256; 211652; 15900; 16153; 16323; 16803; 17700; 17751; 17906; 18479; 18605; 14025; 19141; 19271; 20354; 20355; 21803; 21926; 21960; 56191; 56401; 56437; 23886; 56742; 20720; 59011; 257632; 75766; 193740; 54612	ENSMUSG00000074063; ENSMUSG00000021451; ENSMUSG00000046718; ENSMUSG00000018849; ENSMUSG00000029322; ENSMUSG00000000861; ENSMUSG00000016529; ENSMUSG00000023092; ENSMUSG00000028641; ENSMUSG00000068697; ENSMUSG00000016024; ENSMUSG00000002603; ENSMUSG00000055994; ENSMUSG00000022150; ENSMUSG00000018822; ENSMUSG00000022303; ENSMUSG00000091971; ENSMUSG00000026100; ENSMUSG00000037370; ENSMUSG00000024401;…	279	279
0.00612997	0.0218673	GO:0085029	b	4	extracellular matrix assembly	100952; 14456; 15116; 15117; 16948; 20682; 21803	ENSMUSG00000024529; ENSMUSG00000000567; ENSMUSG00000002603; ENSMUSG00000022367; ENSMUSG00000003665; ENSMUSG00000031451; ENSMUSG00000029163	23	23
0.0062623	0.0222806	GO:0071560	b	4	cellular response to transforming growth factor beta stimulus	16419; 13051; 100952; 68939; 235505; 50490; 74117; 12394; 12843; 11783; 11846; 12579; 78558; 13132; 13433; 170676; 14281; 14360; 14538; 16476; 246154; 17700; 214425; 18787; 20296; 20666; 20682; 21803; 21809; 21825; 216869; 15446; 224109; 27528; 23939	ENSMUSG00000042834; ENSMUSG00000052384; ENSMUSG00000021360; ENSMUSG00000029096; ENSMUSG00000031613; ENSMUSG00000042254; ENSMUSG00000030562; ENSMUSG00000052684; ENSMUSG00000002603; ENSMUSG00000022150; ENSMUSG00000029661; ENSMUSG00000026100; ENSMUSG00000022952; ENSMUSG00000092035; ENSMUSG00000022817; ENSMUSG00000019843; ENSMUSG00000063632; ENSMUSG00000040152; ENSMUSG00000021253; ENSMUSG00000021250;…	224	224
0.00641047	0.0227479	GO:0044843	b	4	cell cycle G1/S phase transition	67628; 104418; 106795; 404710; 11629; 12043; 12122; 12322; 12428; 12443; 12448; 12579; 13555; 14199; 237256; 14726; 14841; 15170; 16323; 16952; 18973; 19650; 20293; 20620; 71878; 381293; 27214; 27401; 20555; 93695	ENSMUSG00000002297; ENSMUSG00000023092; ENSMUSG00000028068; ENSMUSG00000024397; ENSMUSG00000050410; ENSMUSG00000027490; ENSMUSG00000004446; ENSMUSG00000007080; ENSMUSG00000004266; ENSMUSG00000027641; ENSMUSG00000054115; ENSMUSG00000039981; ENSMUSG00000050107; ENSMUSG00000070348; ENSMUSG00000028583; ENSMUSG00000035352; ENSMUSG00000028333; ENSMUSG00000028212; ENSMUSG00000040479; ENSMUSG00000041498;…	185	185
0.00657919	0.0232855	GO:1905954	b	4	positive regulation of lipid localization	72054; 12394; 12306; 13132; 16176; 16971; 18439; 18753; 216739; 20288; 53322; 20750; 21934; 21943; 56489; 69573; 11307	ENSMUSG00000040249; ENSMUSG00000021948; ENSMUSG00000003484; ENSMUSG00000032231; ENSMUSG00000026321; ENSMUSG00000022150; ENSMUSG00000043421; ENSMUSG00000042349; ENSMUSG00000029304; ENSMUSG00000025044; ENSMUSG00000030659; ENSMUSG00000022952; ENSMUSG00000020333; ENSMUSG00000027398; ENSMUSG00000022015; ENSMUSG00000024030; ENSMUSG00000029468	88	88
0.00677157	0.023476	GO:0031664	b	4	regulation of lipopolysaccharide-mediated signaling pathway	12523; 16365; 17079; 17084; 17087; 21929	ENSMUSG00000025779; ENSMUSG00000021624; ENSMUSG00000022126; ENSMUSG00000021423; ENSMUSG00000038147; ENSMUSG00000019850	18	18
0.00677157	0.023476	GO:0010523	b	4	negative regulation of calcium ion transport into cytosol	76757; 12043; 12314; 12373; 14226; 21803	ENSMUSG00000020635; ENSMUSG00000002603; ENSMUSG00000057329; ENSMUSG00000027861; ENSMUSG00000019787; ENSMUSG00000036438	18	18
0.00677655	0.023476	GO:0033197	b	4	response to vitamin E	11486; 11846; 12443; 14226; 16846	ENSMUSG00000017697; ENSMUSG00000019987; ENSMUSG00000059201; ENSMUSG00000070348; ENSMUSG00000020635	13	13
0.00677655	0.023476	GO:0048143	b	4	astrocyte activation	11820; 14289; 16176; 16835; 16971	ENSMUSG00000027398; ENSMUSG00000052270; ENSMUSG00000040249; ENSMUSG00000032193; ENSMUSG00000022892	13	13
0.00677655	0.023476	GO:0002551	b	4	mast cell chemotaxis	12771; 14205; 18654; 19354; 20947	ENSMUSG00000033220; ENSMUSG00000031380; ENSMUSG00000004791; ENSMUSG00000031015; ENSMUSG00000035448	13	13
0.00677655	0.023476	GO:0072672	b	4	neutrophil extravasation	68891; 270152; 11501; 16177; 58217	ENSMUSG00000025473; ENSMUSG00000052212; ENSMUSG00000026072; ENSMUSG00000048534; ENSMUSG00000042265	14	13
0.00677655	0.023476	GO:0060263	b	4	regulation of respiratory burst	74748; 16069; 16803; 19354; 227541	ENSMUSG00000033220; ENSMUSG00000067149; ENSMUSG00000039145; ENSMUSG00000016024; ENSMUSG00000053318	13	13
0.00677655	0.023476	GO:0051315	b	4	attachment of mitotic spindle microtubules to kinetochore	229841; 67052; 67177; 66977; 73804	ENSMUSG00000006585; ENSMUSG00000024056; ENSMUSG00000028678; ENSMUSG00000045328; ENSMUSG00000026683	13	13
0.00678929	0.023476	GO:1990874	b	4	vascular smooth muscle cell proliferation	233571; 13433; 14678; 15368; 16000; 16153; 16476; 18479; 21809; 21926; 22003; 15446	ENSMUSG00000020053; ENSMUSG00000048779; ENSMUSG00000032562; ENSMUSG00000030774; ENSMUSG00000005413; ENSMUSG00000032366; ENSMUSG00000021253; ENSMUSG00000004099; ENSMUSG00000016529; ENSMUSG00000031613; ENSMUSG00000024401; ENSMUSG00000052684	54	54
0.00709579	0.0244732	GO:0009743	b	4	response to carbohydrate	54598; 67177; 236900; 50490; 14456; 12289; 238377; 94353; 76267; 11601; 11799; 11829; 12290; 12834; 13039; 13057; 14219; 14226; 15357; 15894; 16000; 16176; 16846; 16971; 17096; 17970; 18111; 18751; 215449; 19225; 19229; 19275; 20296; 21803; 21825; 218461; 22228; 22329; 14761; 97086	ENSMUSG00000021477; ENSMUSG00000020635; ENSMUSG00000020241; ENSMUSG00000032487; ENSMUSG00000059201; ENSMUSG00000021684; ENSMUSG00000037994; ENSMUSG00000031465; ENSMUSG00000019997; ENSMUSG00000052681; ENSMUSG00000020053; ENSMUSG00000006519; ENSMUSG00000037405; ENSMUSG00000027962; ENSMUSG00000010663; ENSMUSG00000030562; ENSMUSG00000033685; ENSMUSG00000047415; ENSMUSG00000015968; ENSMUSG00000004110;…	266	266
0.00717265	0.0246754	GO:0071241	b	4	cellular response to inorganic substance	11820; 268697; 74096; 74772; 12550; 11513; 11687; 11690; 11747; 12010; 12317; 12428; 13058; 13163; 13605; 14281; 14913; 15368; 29875; 81897; 16476; 16478; 17751; 229731; 17969; 18164; 19141; 19225; 19361; 216343; 21825; 28240; 54153; 234577	ENSMUSG00000071076; ENSMUSG00000045322; ENSMUSG00000032487; ENSMUSG00000040322; ENSMUSG00000009292; ENSMUSG00000060063; ENSMUSG00000022892; ENSMUSG00000027323; ENSMUSG00000052684; ENSMUSG00000041431; ENSMUSG00000018924; ENSMUSG00000036622; ENSMUSG00000023982; ENSMUSG00000003814; ENSMUSG00000034361; ENSMUSG00000027699; ENSMUSG00000004952; ENSMUSG00000021250; ENSMUSG00000015340; ENSMUSG00000021190;…	218	218
0.00737504	0.0253072	GO:0034605	b	4	cellular response to heat	226101; 233781; 21426; 13163; 14164; 15368; 15482; 15511; 15939; 17096; 19225; 19414; 193740; 63873	ENSMUSG00000032487; ENSMUSG00000005413; ENSMUSG00000029553; ENSMUSG00000036585; ENSMUSG00000002307; ENSMUSG00000091971; ENSMUSG00000048612; ENSMUSG00000090877; ENSMUSG00000014158; ENSMUSG00000031453; ENSMUSG00000030657; ENSMUSG00000042228; ENSMUSG00000007033; ENSMUSG00000056708	68	68
0.0074684	0.0255627	GO:0050918	b	4	positive chemotaxis	11601; 12721; 14068; 14178; 14205; 14289; 15234; 15945; 16854; 16971; 18654; 19271; 20210; 20302; 97165	ENSMUSG00000031380; ENSMUSG00000052270; ENSMUSG00000025314; ENSMUSG00000050335; ENSMUSG00000030707; ENSMUSG00000034855; ENSMUSG00000028864; ENSMUSG00000004791; ENSMUSG00000040249; ENSMUSG00000040026; ENSMUSG00000031465; ENSMUSG00000000982; ENSMUSG00000031443; ENSMUSG00000027208; ENSMUSG00000054717	75	75
0.00807902	0.0275829	GO:0007200	b	4	phospholipase C-activating G protein-coupled receptor signaling pathway	13051; 70839; 12267; 12273; 78826; 14289; 14676; 14744; 14747; 15559; 213438; 18162; 18796; 14761; 319430; 26941; 64095; 110168	ENSMUSG00000050921; ENSMUSG00000052270; ENSMUSG00000040061; ENSMUSG00000049130; ENSMUSG00000026271; ENSMUSG00000021886; ENSMUSG00000050350; ENSMUSG00000022206; ENSMUSG00000052336; ENSMUSG00000042190; ENSMUSG00000034792; ENSMUSG00000036353; ENSMUSG00000074361; ENSMUSG00000054293; ENSMUSG00000040552; ENSMUSG00000020733; ENSMUSG00000026228; ENSMUSG00000072875	97	97
0.00867426	0.0293925	GO:0071609	b	4	chemokine (C-C motif) ligand 5 production	68279; 19261; 225471; 63873	ENSMUSG00000014158; ENSMUSG00000037902; ENSMUSG00000011008; ENSMUSG00000056130	9	9
0.00867426	0.0293925	GO:0023035	b	4	CD40 signaling pathway	83433; 14087; 21929; 211651	ENSMUSG00000023992; ENSMUSG00000019850; ENSMUSG00000034023; ENSMUSG00000032815	9	9
0.00867426	0.0293925	GO:0009113	b	4	purine nucleobase biosynthetic process	270685; 11486; 11821; 15452	ENSMUSG00000017697; ENSMUSG00000006589; ENSMUSG00000025630; ENSMUSG00000040675	9	9
0.00884279	0.0296661	GO:0033031	b	4	positive regulation of neutrophil apoptotic process	12505; 16952; 18707	ENSMUSG00000039936; ENSMUSG00000005087; ENSMUSG00000024659	5	5
0.00884279	0.0296661	GO:0060278	b	4	regulation of ovulation	16323; 16324; 18792	ENSMUSG00000037035; ENSMUSG00000041324; ENSMUSG00000021822	5	5
0.00884279	0.0296661	GO:0098735	b	4	positive regulation of the force of heart contraction	17906; 20191; 20541	ENSMUSG00000021313; ENSMUSG00000054640; ENSMUSG00000013936	5	5
0.00884279	0.0296661	GO:0003096	b	4	renal sodium ion transport	80884; 100503085; 26941	ENSMUSG00000014164; ENSMUSG00000020733; ENSMUSG00000025268	5	5
0.00906264	0.0303284	GO:0071498	b	4	cellular response to fluid shear stress	15117; 19225; 19229; 20750; 23939; 21789	ENSMUSG00000001034; ENSMUSG00000032487; ENSMUSG00000059456; ENSMUSG00000029664; ENSMUSG00000022367; ENSMUSG00000029304	19	19
0.00923149	0.0308172	GO:0009100	b	4	glycoprotein metabolic process	230145; 66357; 68169; 232313; 232984; 233115; 109901; 233781; 234356; 235534; 107895; 57357; 108150; 207839; 12043; 12111; 14347; 14425; 14537; 14538; 14594; 14733; 15200; 16000; 16848; 17155; 17158; 17159; 17381; 230815; 17751; 19288; 20448; 20652; 381903; 21982; 51801; 56336; 56386; 319901; 53418; 53625; 26877; 15442; 60322; 239559; 227671; 64294; 97440; 212898	ENSMUSG00000069920; ENSMUSG00000035273; ENSMUSG00000038702; ENSMUSG00000039774; ENSMUSG00000030074; ENSMUSG00000026829; ENSMUSG00000031375; ENSMUSG00000034780; ENSMUSG00000021360; ENSMUSG00000029570; ENSMUSG00000039497; ENSMUSG00000030657; ENSMUSG00000037306; ENSMUSG00000027832; ENSMUSG00000029233; ENSMUSG00000029234; ENSMUSG00000024486; ENSMUSG00000023031; ENSMUSG00000051650; ENSMUSG00000017929;…	353	353
0.00959637	0.0319002	GO:0032355	b	4	response to estradiol	394436; 11867; 12122; 12317; 12428; 12443; 12955; 14068; 14219; 14824; 16153; 16193; 16846; 16952; 18430; 19220; 19225; 19378; 20296; 20310; 21803; 15446; 93692	ENSMUSG00000032487; ENSMUSG00000059201; ENSMUSG00000031443; ENSMUSG00000004446; ENSMUSG00000016529; ENSMUSG00000031613; ENSMUSG00000019997; ENSMUSG00000021591; ENSMUSG00000029622; ENSMUSG00000002603; ENSMUSG00000089960; ENSMUSG00000070348; ENSMUSG00000003814; ENSMUSG00000013584; ENSMUSG00000028036; ENSMUSG00000058427; ENSMUSG00000034708; ENSMUSG00000035385; ENSMUSG00000027715; ENSMUSG00000032060;…	136	136
0.00967389	0.0319002	GO:0006968	b	4	cellular defense response	12010; 12772; 17969; 19229; 20400	ENSMUSG00000059456; ENSMUSG00000005696; ENSMUSG00000015950; ENSMUSG00000060802; ENSMUSG00000049103	14	14
0.00967389	0.0319002	GO:0097531	b	4	mast cell migration	12771; 14205; 18654; 19354; 20947	ENSMUSG00000033220; ENSMUSG00000031380; ENSMUSG00000004791; ENSMUSG00000031015; ENSMUSG00000035448	14	14
0.00967389	0.0319002	GO:0090136	b	4	epithelial cell-cell adhesion	16419; 20725; 21828; 23828; 13078	ENSMUSG00000071317; ENSMUSG00000022817; ENSMUSG00000024087; ENSMUSG00000021702; ENSMUSG00000026315	14	14
0.00967389	0.0319002	GO:0002371	b	4	dendritic cell cytokine production	21898; 69550; 24088; 81897; 257632	ENSMUSG00000027995; ENSMUSG00000046718; ENSMUSG00000055994; ENSMUSG00000045322; ENSMUSG00000039005	14	14
0.00990837	0.032594	GO:0098751	b	4	bone cell development	11308; 238377; 12306; 15170; 18718; 21943; 22177; 80752; 97086	ENSMUSG00000058835; ENSMUSG00000032231; ENSMUSG00000004266; ENSMUSG00000025854; ENSMUSG00000037994; ENSMUSG00000026737; ENSMUSG00000022015; ENSMUSG00000030579; ENSMUSG00000047415	37	37
